# Supplementary material
Source: publisher figshare collection journal article supplement (https://future-science-group.figshare.com/ndownloader/files/31698059)
Supplement: Supplementary file 1 [file 31698059]

## Sheet: Mothers
DMR	pval	padj	log2err	ES	NES	size	leadingEdge
BCOR	1e-10	3.892e-07	#N/A	-0.622734	-3.41676	143	cg18385808, cg11650160, cg05804339, cg07096038, cg26046341, cg01490258, cg18748527, cg04413754, cg16802801, cg10856819, cg15627188, cg02931660, cg02932805, cg16153146, cg07099245, cg18610223, cg09810925, cg18744436, cg15887754, cg06010380, cg01321830, cg20197861, cg11620557, cg23701759, cg01224425, cg00016934, cg14393968, cg15133344, cg02433927, cg21180513, cg06276798, cg21662807, cg04992335, cg1…
ISM1	1e-10	3.892e-07	#N/A	-0.796784	-3.1759	30	cg26322248, cg12664209, cg21561970, cg14060111, cg12448198, cg09491991, cg25178765, cg25606624, cg02145932, cg11155707, cg06262436, cg27427234, cg19938101, cg06355010, cg12741255, cg04432319, cg19118558, cg03172651, cg25796439
CCNA1	1e-10	3.892e-07	#N/A	-0.706062	-2.91395	38	cg11023392, cg14089714, cg24334591, cg08676975, cg00370179, cg05137358, cg07962128, cg02478448, cg14499563, cg24154053, cg06260815, cg19866195, cg12417071, cg26345046, cg21754388, cg18948722, cg23182559, cg05089090, cg13060997, cg13711394, cg12571423, cg18348647, cg23831735, cg24233119, cg17495912
HOXA5	1.02236e-09	2.68868e-06	0.788187	-0.691509	-2.83795	36	cg17432857, cg04863892, cg25506432, cg19759481, cg03368099, cg23454797, cg14882265, cg02005600, cg17569124, cg03207666, cg25307665, cg14014955, cg26023912, cg25390165, cg03744763, cg23936031, cg07049592, cg09207400, cg20517050, cg02646423, cg02916332, cg09549073, cg02106682, cg20817131, cg12015737, cg01748892, cg14058329, cg14013695
ARID5B	6.4693e-08	6.62593e-05	0.704976	-0.721166	-2.8022	27	cg25961903, cg10708548, cg16253809, cg05976652, cg19238103, cg06062519, cg24887381, cg17973778, cg01969278, cg22846816, cg20728881, cg05882781, cg05100313, cg02479789, cg15831769, cg06456847, cg26002628, cg23468816, cg10682219, cg21250167
OTX1	1.032e-09	2.68868e-06	0.788187	-0.670032	-2.79904	40	cg13471114, cg25037384, cg23116322, cg26736450, cg00374224, cg15561583, cg13409575, cg10020373, cg15853117, cg12376047, cg08210688, cg15862215, cg27581028, cg26313088, cg10658666, cg01313497, cg07776900, cg27556193, cg17162260, cg00157515, cg22944632
RPL15	2.96832e-07	0.000206298	0.674963	-0.729853	-2.72047	23	cg22897779, cg06259441, cg05571164, cg06151625, cg06949789, cg12117273, cg25466588, cg15720127, cg03749093, cg00739272, cg07002286, cg10113231, cg05036608, cg26266876, cg03754264
FOXG1	1.03402e-07	9.14634e-05	0.704976	-0.717194	-2.7099	26	cg16804284, cg09231862, cg17525102, cg26206396, cg10828337, cg05872306, cg21923619, cg25078444, cg07974473, cg23191956, cg10912240, cg12150366, cg10300684, cg07150445, cg19714132, cg18299578, cg16038120, cg16582779
DPP6	9.40275e-08	8.71322e-05	0.704976	-0.679673	-2.70911	30	cg27032232, cg19161124, cg14523847, cg08963505, cg06002683, cg04819716, cg06495961, cg13995297, cg04471914, cg09527513, cg08858690, cg23993562, cg10999407, cg19274890, cg13544851, cg22620221, cg02485566, cg15549927
FBN2	4.91255e-08	6.1752e-05	0.719513	-0.777801	-2.70795	19	cg05194233, cg04929533, cg05209584, cg12940822, cg05686497, cg25532099, cg27223047, cg11965976, cg10866940, cg23621127, cg17564775, cg25084878, cg02620875, cg17958315, cg01939274
SLITRK5	6.28986e-08	6.62593e-05	0.704976	-0.773813	-2.69406	19	cg09083627, cg19391029, cg15778745, cg15461335, cg12271981, cg08492619, cg21194448, cg27151812, cg26110710, cg07710481, cg17967577, cg25081106, cg06682197
UNC5C	2.24412e-07	0.000174682	0.690132	-0.782062	-2.66353	18	cg20377606, cg15701178, cg00329039, cg13265789, cg20051210, cg15984718, cg14107210, cg12802900, cg10520887, cg01194057, cg12584684, cg17334018, cg11723848
MED14	4.67747e-08	6.1752e-05	0.719513	-0.870731	-2.64641	12	cg24682488, cg20332242, cg02302131, cg09504728, cg03465847, cg27522270, cg04507972, cg22961098, cg00573298, cg17165799, cg07458836
TSEN34	4.81112e-07	0.000302014	0.659444	-0.669429	-2.64594	28	cg18962915, cg14070281, cg02867897, cg04512704, cg21033010, cg23233673, cg21086156, cg05314090, cg19351665, cg11680855, cg07518035, cg19542892, cg13622047, cg03457587, cg03278989, cg21577705, cg13922166, cg23968678, cg00446966, cg22737919, cg11940876, cg12173535
CXorf38	5.07724e-08	6.1752e-05	0.719513	-0.869345	-2.6422	12	cg15322570, cg17041400, cg16776114, cg18364820, cg22148243, cg20137045, cg16371488, cg13645941, cg15587142
VWDE	2.00454e-06	0.000812676	0.627257	-0.796267	-2.63512	15	cg26280682, cg03579179, cg06484146, cg10578991, cg20607287, cg05505627, cg05205670, cg19397885, cg16278512
CASP9	3.57944e-07	0.000240193	0.674963	-0.77337	-2.63393	18	cg12138346, cg18407966, cg22734925, cg11404049, cg24483825, cg16706559, cg24061073, cg25845331, cg25019631, cg04725029, cg25154447, cg16851799, cg18406510
PAX6	1e-10	3.892e-07	#N/A	-0.542783	-2.61174	77	cg02642123, cg11482099, cg11162118, cg16113298, cg23484599, cg04832932, cg25242557, cg12086936, cg26544363, cg05091519, cg13769697, cg15889872, cg23933618, cg15931945, cg25949958, cg19006378, cg09217215, cg18058532, cg18270629, cg03527353, cg11333459, cg07660750, cg09252999, cg27597956, cg11897577, cg04504066, cg15927696, cg01665555, cg16556511, cg08782920, cg10448436, cg17280740, cg16004664, cg1…
ISL1	4.52639e-07	0.000293612	0.674963	-0.784592	-2.61047	17	cg16318053, cg17412886, cg08734740, cg07270078, cg01587896, cg11039614, cg17037282, cg18716076, cg11711420, cg06424860, cg14834938, cg23318843, cg08917478, cg26965238, cg21410991
ZNF771	5.85231e-07	0.000334959	0.659444	-0.765968	-2.60872	18	cg12943364, cg20662014, cg05731156, cg19415738, cg09946496, cg01402814, cg00375157, cg09756132, cg16192149, cg21295905, cg15572689, cg12770112
TBX15	3.80382e-09	8.2247e-06	0.761461	-0.581536	-2.59772	55	cg17868079, cg25507958, cg09260773, cg02177231, cg14175690, cg23371746, cg00173504, cg26272623, cg14272433, cg06158650, cg10703826, cg14565725, cg21295088, cg27262412, cg27517681, cg23588217, cg18944010, cg24720355, cg18053470, cg12664119, cg13080379, cg07820868, cg19730691, cg14415885, cg04550737, cg24475782, cg02829688, cg24884142, cg26104752, cg06204711, cg13655674, cg02362103, cg21170796, cg2…
SNAP25	6.81294e-07	0.000368277	0.659444	-0.686651	-2.5945	26	cg11687406, cg12909741, cg22537474, cg17553634, cg11355215, cg06433879, cg14398275, cg13088102, cg16786007, cg08921126, cg23328622
DNAJC24	1.68371e-06	0.000728112	0.643552	-0.72691	-2.5938	20	cg26224996, cg01711021, cg21433330, cg00892312, cg24811929, cg22333733, cg16322655, cg25572812, cg17730486, cg13669089, cg12882726, cg16048161
MAGI2	7.93255e-07	0.000417209	0.659444	-0.692761	-2.59149	24	cg24021956, cg22409558, cg04671932, cg05270344, cg02523844, cg02699069, cg20996682, cg17880166, cg07985720, cg13382769, cg14464244, cg08641579, cg07448060, cg12258161, cg05902852, cg04652097
MBOAT7	1.55116e-06	0.000686038	0.643552	-0.650937	-2.5884	29	cg18962915, cg14070281, cg02867897, cg04512704, cg21033010, cg23233673, cg21086156, cg05314090, cg19351665, cg11680855, cg07518035, cg19542892, cg13622047, cg03457587, cg03278989, cg21577705, cg13922166, cg23968678, cg00446966, cg22737919, cg11940876, cg12173535
GATA5	9.0987e-07	0.000454002	0.659444	-0.690615	-2.58346	24	cg08568720, cg00677866, cg11982072, cg23770904, cg12664464, cg24500900, cg13845982, cg02146001, cg09339194, cg04742780, cg16714055, cg02484469, cg14831174, cg20265733, cg14388488, cg16919517, cg18278265, cg07914822, cg14980983
PITX1	4.32222e-06	0.00123692	0.610527	-0.81932	-2.57226	13	cg12018047, cg17097766, cg07803210, cg25648267, cg16232488, cg24495017, cg06933574
ARL1	4.42829e-06	0.0012489	0.610527	-0.819112	-2.5716	13	cg25655805, cg20902146, cg24923975, cg23903357, cg05469421, cg00667976, cg22417797, cg07332734, cg10656674
ATM	1.66259e-08	3.23539e-05	0.733762	-0.589919	-2.57052	46	cg25918541, cg17420659, cg18042593, cg09808176, cg01756564, cg06081482, cg05637308, cg24030675, cg18457775, cg12848864, cg01991180, cg03569616, cg17114932, cg22477592, cg05231509, cg06750635, cg24568245, cg25400013, cg12106634, cg04826772, cg27599391, cg23275463, cg17726328, cg14761454, cg03165700, cg11588932, cg16693212
FXYD5	2.29346e-06	0.000858285	0.627257	-0.773485	-2.56982	16	cg26721700, cg25148782, cg16860694, cg27349888, cg25376238, cg10227705, cg11260421, cg17922329, cg09966364, cg09386954
POLQ	8.66382e-06	0.00183259	0.593325	-0.77006	-2.54839	15	cg20427955, cg02083999, cg19524774, cg22955676, cg21097199, cg01352503, cg05990556, cg22279341, cg21994086, cg12585158, cg06267626, cg17058565
LEPROT	4.19324e-06	0.00121792	0.610527	-0.763426	-2.5364	16	cg02096219, cg03853587, cg27515746, cg26299980, cg21655790, cg25307371, cg12004643, cg07921092, cg23055818, cg07342512, cg10062258, cg16413020, cg08048135, cg08610741
GAPDH	3.92309e-06	0.00118595	0.610527	-0.71048	-2.53517	20	cg09925823, cg26366925, cg21138725, cg08074458, cg00241355, cg10772244, cg09578677, cg04881957, cg26617772, cg02519286, cg26249857, cg15812118
MME	4.95063e-06	0.00133804	0.610527	-0.695993	-2.53378	21	cg08085954, cg03648334, cg03740997, cg21496658, cg22471230, cg23273897, cg22001630, cg00992239, cg07327039, cg23209255, cg07862554, cg10094892, cg22955973
TRIM23	1.30908e-06	0.000621335	0.643552	-0.693933	-2.53292	22	cg10166159, cg10100093, cg05808399, cg10186232, cg26632494, cg27081973, cg01395394, cg23996767, cg11399754, cg05455370, cg12490816
GABRA5	2.16777e-06	0.000843696	0.627257	-0.62855	-2.53098	31	cg16967626, cg10652393, cg16803846, cg04286377, cg19005707, cg00329728, cg03325535, cg14417760, cg05614333, cg10318222, cg11786657, cg21402921
CADPS2	2.84595e-06	0.000954811	0.627257	-0.740711	-2.5227	18	cg18574157, cg03148658, cg02439311, cg21953346, cg20692011, cg06779604, cg05293994, cg13476076, cg06159603, cg10028217, cg26316023, cg25893357, cg10330371
CDH3	2.49337e-06	0.000898538	0.627257	-0.758014	-2.52204	17	cg21507238, cg19058575, cg01296763, cg19034028, cg00748373, cg04904099, cg16677923, cg17733331, cg23969378, cg21843128, cg11843735
PRDM8	4.5283e-08	6.1752e-05	0.719513	-0.587479	-2.51994	45	cg14489346, cg04235768, cg26299084, cg27018912, cg18073471, cg19595012, cg10694470, cg03463411, cg05059566, cg11388320, cg26162932, cg22186374, cg06307913, cg06373870, cg22902505, cg00138041, cg10695325, cg27242132, cg21082141, cg09595050, cg06624978, cg05452645
DPYSL4	1.3316e-05	0.00231908	0.593325	-0.759517	-2.5135	15	cg17695462, cg02578540, cg18915452, cg05652533, cg01261798, cg24215070, cg08753373, cg25041901, cg08658621, cg07295678, cg27554514
LHX5	1.3316e-05	0.00231908	0.593325	-0.759442	-2.51325	15	cg01638369, cg20670075, cg02328332, cg04624601, cg11821579, cg27554357, cg08745498, cg23497704, cg23922454, cg03190580, cg18377161
LMO3	2.6114e-07	0.000195454	0.674963	-0.57651	-2.51309	47	cg23704770, cg11511443, cg17981966, cg09596234, cg15686802, cg01181415, cg03745994, cg19140085, cg22702331, cg12210040, cg15500052, cg09683887, cg07825114, cg21016004, cg10143811, cg15401526, cg08042370, cg17736030, cg04047674, cg20576393, cg00564190, cg16412956, cg10800369, cg19016652, cg12784704, cg26044490, cg00780879, cg09526758, cg00606190, cg14905657
ERBB4	1.37713e-05	0.00235078	0.593325	-0.759138	-2.51224	15	cg00011346, cg03822365, cg22623159, cg00787188, cg06149408, cg19079194, cg20637307, cg13920232, cg07015629
RBBP7	6.15659e-06	0.00147584	0.610527	-0.755963	-2.5116	16	cg03811055, cg03171708, cg06293739, cg03048084, cg01985781, cg17880859, cg25666255, cg01947226, cg17878446, cg15289846, cg11178991, cg16978043, cg14719055, cg07096248, cg16784820, cg20246257
PLXDC2	6.63475e-06	0.00155249	0.610527	-0.75377	-2.50432	16	cg02937925, cg00939460, cg24022375, cg18779078, cg14049470, cg07534516, cg08625590, cg17603206, cg18109941, cg12563178, cg13149307, cg10652819
UBE3B	1.03802e-05	0.00208246	0.593325	-0.671095	-2.50145	23	cg11705804, cg26081466, cg21593513, cg11155082, cg20092036, cg14196331, cg08408988, cg12203080, cg14082658, cg10158077, cg19752449
OTX2	1.11848e-06	0.000544139	0.643552	-0.60888	-2.4978	35	cg04736351, cg00822495, cg10243278, cg15607672, cg22070544, cg03091551, cg16793394, cg26998537, cg13826890, cg10042106, cg27122213, cg19600750, cg23316987, cg06966811, cg05241355, cg02283081, cg13784080, cg13411015, cg23365739
TRIOBP	3.56892e-06	0.00112018	0.627257	-0.660679	-2.49636	26	cg12325455, cg15945593, cg11540735, cg06594770, cg14268632, cg10921709, cg22706634, cg12379720, cg06644488, cg13897416, cg11679014, cg05691152, cg03475527
ARHGEF11	7.54105e-06	0.00168677	0.610527	-0.833152	-2.49206	11	cg19729719, cg21134083, cg21585493, cg00615145, cg18281101, cg01511880, cg04811924, cg15883322
TMEM106A	2.63551e-06	0.00093249	0.627257	-0.819533	-2.49081	12	cg04524477, cg04482110, cg24008544, cg15026277, cg24940138, cg18222083, cg21211480, cg08377924, cg05023568
GRIN2A	3.96129e-06	0.00118595	0.610527	-0.65901	-2.49005	26	cg14011057, cg05406943, cg09239744, cg00036299, cg00287829, cg00518386, cg16904585, cg08621611, cg02585344, cg06922606, cg06193383
C14orf132	6.07274e-06	0.00147584	0.610527	-0.855674	-2.48954	10	cg07145366, cg07943633, cg07749243, cg18353837, cg23505344, cg22922226, cg05906607
DBP	3.05676e-06	0.000991409	0.627257	-0.714982	-2.48924	19	cg06530960, cg13670615, cg26789053, cg11700415, cg13239685, cg26571142, cg02221863, cg24564368, cg26914390, cg21547979, cg26761504, cg06677660, cg19090553, cg21103306, cg13402773
EYA4	3.42956e-08	5.5616e-05	0.719513	-0.564883	-2.48828	51	cg01401376, cg11518846, cg01162672, cg13854642, cg01328892, cg26501369, cg05062333, cg14287112, cg20602026, cg06764333, cg20330472, cg24842760, cg15729404, cg08885224, cg14270292, cg24176563, cg08712932, cg20286200, cg20093099, cg17348951, cg02446647, cg14343214, cg14817541, cg20422212
HCG4P6	4.16097e-06	0.00121792	0.610527	-0.747082	-2.48567	17	cg25644740, cg03876548, cg23237314, cg18741404, cg18786623, cg15070894, cg24751894, cg04520169
FOXI2	2.15104e-05	0.00307707	0.57561	-0.750466	-2.48355	15	cg02523640, cg09614415, cg04617948, cg25576011, cg02595832, cg25539045, cg16642284, cg13929328, cg08829841, cg19884262, cg24826696
INSM1	1.21337e-05	0.00226711	0.593325	-0.746707	-2.48085	16	cg09062550, cg11015038, cg06033738, cg07505725, cg07878514, cg22266602, cg03380643, cg19284211, cg00119117, cg09725195, cg06377152, cg13326227
KCTD8	2.1102e-05	0.00307707	0.57561	-0.789948	-2.48004	13	cg07650252, cg12300353, cg27051954, cg17790605, cg20646280, cg10059660, cg03836414, cg11258164, cg01254575
LOX	4.6871e-06	0.00130301	0.610527	-0.662746	-2.4792	24	cg08431704, cg21482489, cg08920068, cg15696588, cg11960393, cg03619973, cg06508445, cg02685650, cg12580445, cg16274199, cg08623535, cg15111469, cg26101143, cg20703137
HOXB4	1.33472e-05	0.00231908	0.593325	-0.664926	-2.47846	23	cg05527785, cg17144149, cg26327071, cg02132714, cg19081437, cg05822888, cg13670378, cg08089301, cg14458834, cg02422694
PCDHA7	7.97984e-06	0.00174481	0.593325	-0.851141	-2.47635	10	cg06827234, cg26247335, cg01524894, cg07858872, cg07745166, cg18117367, cg26618441
PIK3CG	8.18059e-06	0.00175366	0.593325	-0.850993	-2.47592	10	cg00604356, cg11982525, cg13214190, cg01791607, cg24384195, cg14558275, cg15881332
PCSK2	2.53911e-05	0.00333859	0.57561	-0.748089	-2.47568	15	cg04423193, cg12763671, cg05846716, cg15060366, cg02979923, cg22504204, cg27343616, cg19864758
FANCG	2.63061e-05	0.00334586	0.57561	-0.747242	-2.47288	15	cg25557827, cg05381508, cg08291335, cg05293216, cg05576539, cg13810570, cg22070613, cg16784825, cg03671189, cg04568768, cg15575165, cg12847655, cg03563403
KCNJ3	5.13286e-06	0.00136829	0.610527	-0.742813	-2.47147	17	cg25534294, cg09408768, cg25932748, cg23491599, cg08022436, cg19023359, cg17300051, cg11706467, cg11856810, cg18481230, cg11030481, cg17117827, cg24693368, cg00622661, cg14574037
SIX6	2.63061e-05	0.00334586	0.57561	-0.746477	-2.47035	15	cg06830500, cg12099524, cg06808498, cg07747306, cg13939792, cg14611174, cg19456540, cg13769906, cg22154539, cg14186066, cg20585530
HCFC1	5.31509e-06	0.00136982	0.610527	-0.741701	-2.46777	17	cg03968699, cg13937627, cg04764476, cg03250911, cg06809565, cg03177323, cg03672915, cg11778030, cg03189022, cg10155960, cg05103731, cg07086565, cg06022838, cg08627233, cg21960840, cg09222696
LSM5	1.76037e-06	0.000744714	0.643552	-0.600633	-2.46397	35	cg06331674, cg07520158, cg20042318, cg02475131, cg12349875, cg10588026, cg10576261, cg25360747, cg02944902, cg13340257, cg06929521, cg10045446, cg23993245, cg23991560, cg00374298, cg16459491, cg05989381, cg26339348, cg08701488
BMP4	4.76989e-06	0.00130735	0.610527	-0.654094	-2.46217	25	cg08162372, cg18686155, cg01873886, cg02254554, cg09226388, cg08046044, cg16277510, cg08169864, cg15318690, cg16190896, cg18951977, cg03054480, cg04245766, cg01963240, cg20297199, cg09229893, cg14310034, cg19534551, cg10952804, cg16389901
GTSE1	1.57377e-05	0.00255213	0.57561	-0.740997	-2.46188	16	cg27312717, cg10231785, cg07012999, cg25690627, cg05173324, cg01629058, cg13802192, cg24015316, cg24199050
PCDHGA2	1.24605e-05	0.00226711	0.593325	-0.689572	-2.46057	20	cg21845562, cg14505360, cg10933186, cg20717585, cg22056094, cg00798403, cg18878616, cg16541259, cg22324795, cg22028894, cg16579158, cg23262897, cg14306145, cg19689427, cg04830357
HSPA1A	6.21885e-06	0.00147584	0.610527	-0.610999	-2.4603	31	cg26616261, cg18315695, cg22466425, cg24631716, cg18846140, cg18466674, cg24888257, cg17494781, cg17186760, cg15174834, cg01639032, cg03096830, cg02897359, cg10598353, cg05920090, cg21122656
APOB	5.34975e-06	0.00136982	0.610527	-0.808364	-2.45686	12	cg20689167, cg15246511, cg26112457, cg25123895, cg14644031, cg07636176, cg25071744, cg16723488, cg17067405, cg03350299, cg16306978
ZNRD1	2.13072e-06	0.000843696	0.627257	-0.598109	-2.45362	35	cg21759797, cg01382504, cg18832902, cg05382797, cg17197870, cg21793016, cg22394535, cg05636177, cg00609363, cg12389025, cg17994050, cg09247880, cg10680836, cg02649933, cg27023654, cg07481734
WDR6	1.54638e-05	0.00252878	0.57561	-0.766206	-2.45262	14	cg07636037, cg13415434, cg01433699, cg07702554, cg08889949, cg08451218
FAM59A	6.70139e-06	0.00155249	0.610527	-0.620069	-2.45084	28	cg26427436, cg14482684, cg13559259, cg05503968, cg11393453, cg23914146, cg12692042, cg16458671, cg00576121, cg14385280, cg07306881, cg23954489, cg06972911
ADCY8	3.68149e-05	0.00414114	0.557332	-0.780426	-2.45015	13	cg02812947, cg22060073, cg22762091, cg01245966, cg21998264, cg12446629, cg16696270
ZNF667	5.59895e-06	0.00141172	0.610527	-0.703661	-2.44982	19	cg14611676, cg08063125, cg24464397, cg02671486, cg03289872, cg05508084, cg00502665, cg09927569, cg08687005, cg11472930, cg26612735, cg24411929, cg15805104, cg21676790
ZIC1	5.33867e-06	0.00136982	0.610527	-0.601925	-2.44923	33	cg08070771, cg24686610, cg12965599, cg01610632, cg05371578, cg04738965, cg23449696, cg01227537, cg26014538, cg10107050, cg16181396, cg16636671, cg00475509, cg18424634, cg23468878, cg02647941, cg09241332, cg05700079
KCTD10	1.86209e-05	0.00287589	0.57561	-0.73718	-2.4492	16	cg11705804, cg26081466, cg21593513, cg11155082, cg14196331, cg08408988, cg14082658, cg10158077, cg19752449
VWC2	4.2843e-05	0.00453111	0.557332	-0.777352	-2.4405	13	cg07039180, cg05470523, cg04904331, cg04454951, cg07379434, cg02467990, cg01893212, cg18206027, cg15963901, cg00333226, cg09493505
ACTA1	1.22264e-05	0.00226711	0.593325	-0.715972	-2.43844	18	cg12908399, cg20025656, cg23597629, cg04030615, cg07777790, cg00061145, cg09926178, cg11689813, cg00064261, cg02767613, cg26163852, cg13547644, cg05347845, cg08652487, cg14852384
C2orf7	4.36907e-05	0.00459579	0.557332	-0.736206	-2.43635	15	cg14912896, cg06642617, cg12972213, cg13685329, cg13663190, cg14421218, cg00655779, cg05291385, cg14067052, cg26478621, cg03317826, cg19543987
LHX1	1.65736e-05	0.00266547	0.57561	-0.682631	-2.4358	20	cg07885289, cg05323725, cg22660578, cg07829379, cg11078683, cg06042480, cg26134129, cg05146485, cg24761507, cg10356613, cg11769960, cg11290922, cg14114517, cg04993975, cg12279877, cg20189674
GBX2	2.12487e-05	0.00307707	0.57561	-0.76053	-2.43445	14	cg19052355, cg01973124, cg14532827, cg13895867, cg19761848, cg15765724, cg21426003, cg08767286, cg18052020
PENK	1.70575e-05	0.00269869	0.57561	-0.682059	-2.43376	20	cg19149681, cg16072688, cg11060276, cg18331519, cg27531336, cg04612444, cg11610346, cg03650233, cg10397440, cg21694941, cg06066137, cg16419235, cg16219603, cg18742346, cg20885738, cg04598121
PTGER4	1.35706e-05	0.00233703	0.593325	-0.714457	-2.43328	18	cg04727116, cg06013215, cg05006071, cg03337243, cg18314571, cg04790357, cg04824304, cg24716010, cg06802812, cg01897756
ARHGAP5	4.64356e-05	0.00470644	0.557332	-0.734517	-2.43077	15	cg04783279, cg03003608, cg08995409, cg04879390, cg26916470, cg26682510, cg20550520
SMC4	8.20059e-06	0.00175366	0.593325	-0.649299	-2.4289	24	cg09397254, cg04385305, cg16870305, cg18656265, cg01394089, cg22894434, cg16053434, cg21508214, cg16978263, cg00883249, cg24494008, cg10901031, cg16197648, cg07360893, cg00036114
DDX3X	3.17234e-05	0.00381072	0.557332	-0.808836	-2.41933	11	cg12689375, cg16117744, cg27042767, cg02892589, cg06355439, cg17823667, cg03102848, cg04820200
SPRY2	2.417e-05	0.0032971	0.57561	-0.663388	-2.41508	21	cg22417789, cg08421519, cg06585820, cg11436817, cg15629719, cg06125576, cg09546218, cg24499342, cg09833785, cg04180253, cg10994425, cg14883717, cg18032744, cg15925091, cg11599984
ANKRA2	2.47504e-05	0.0032971	0.57561	-0.647674	-2.41415	23	cg27394217, cg24459521, cg26354759, cg21269032, cg10833576, cg08728761, cg18644834, cg04261222, cg11600721, cg27236763, cg17422836, cg22811572, cg01158970
UTP15	2.47504e-05	0.0032971	0.57561	-0.647674	-2.41415	23	cg27394217, cg24459521, cg26354759, cg21269032, cg10833576, cg08728761, cg18644834, cg04261222, cg11600721, cg27236763, cg17422836, cg22811572, cg01158970
CWF19L2	6.01468e-05	0.00546942	0.557332	-0.768665	-2.41323	13	cg23880829, cg10872513, cg25102621, cg02558537, cg12578959, cg05007115, cg25435332, cg12301744, cg19009870, cg19998148, cg05386410, cg07444288
TMEM43	5.4711e-05	0.00524317	0.557332	-0.729145	-2.41299	15	cg16463573, cg14375111, cg10298173, cg14919823, cg00661202, cg13906045, cg21666675, cg27109131
SDR39U1	1.23919e-05	0.00226711	0.593325	-0.724952	-2.41204	17	cg06257945, cg22079042, cg27376464, cg22786903, cg12145739, cg00770265, cg23726762, cg13809815, cg12965799, cg05197323, cg13209455, cg22630367, cg13419797
HIST1H2BC	2.83972e-05	0.00354236	0.57561	-0.75341	-2.41166	14	cg16218610, cg12651412, cg07365404, cg05804587, cg23070249, cg19084075, cg09880012, cg25307277, cg02924961
IGSF8	9.79334e-06	0.00202743	0.593325	-0.691399	-2.40713	19	cg16553182, cg01023271, cg12390003, cg22802111, cg07377341, cg04122068, cg14416284, cg04016768, cg19097259, cg26146390
ARSK	2.97387e-05	0.0036173	0.57561	-0.751339	-2.40503	14	cg25208046, cg12310600, cg18106800, cg26657230, cg07701281, cg05177841, cg01559436, cg23396403, cg14587401, cg09085978
FGFR1OP2	1.01583e-05	0.00205917	0.593325	-0.690601	-2.40435	19	cg13952861, cg03670441, cg22457660, cg20845987, cg04786330, cg14055251, cg05554171, cg08814698, cg14666473, cg04180642, cg14409850, cg02301006, cg17643699
NEFM	1.45605e-05	0.00242176	0.593325	-0.635406	-2.40087	26	cg09234518, cg04118306, cg01583969, cg16459364, cg02761376, cg20585869, cg02106941, cg22562942, cg07552803, cg19677607, cg06210197, cg07502389, cg26980244, cg14139227, cg18267374, cg23290344, cg03169018, cg22940070, cg17078116
C2orf67	7.12619e-05	0.00607807	0.538434	-0.724779	-2.39854	15	cg13365641, cg22385827, cg01733028, cg15730860, cg07225547, cg06459166, cg09378111, cg01747077, cg04052427, cg12760041, cg01547541, cg14837800
CRY2	7.12619e-05	0.00607807	0.538434	-0.724588	-2.39791	15	cg07326765, cg16006220, cg24754334, cg20879606, cg07524456, cg26125082, cg01618083, cg26742859, cg15812322
GDNF	2.93007e-07	0.000206298	0.674963	-0.547182	-2.39566	50	cg21918513, cg02328239, cg18237607, cg26295057, cg21590264, cg07442479, cg03230469, cg25602684, cg16138150, cg14492800, cg24398268, cg26789779, cg24533810, cg21319053, cg04209913, cg03612055, cg19717018, cg16198719, cg07128111, cg26473844, cg04407962, cg05730365, cg15368455, cg02450613, cg23097534, cg20683765
PRDM14	4.0806e-05	0.00441824	0.557332	-0.719901	-2.39179	16	cg04838988, cg23758305, cg17450425, cg27029821, cg02919936, cg00384539, cg13267264, cg19363499, cg01295203, cg09050331, cg11229513, cg07719492
GNAI1	1.21048e-05	0.00226711	0.593325	-0.686774	-2.39103	19	cg09860927, cg07309764, cg18243651, cg25744767, cg04174014, cg16182691, cg09190579, cg08546933, cg05806233, cg01008057, cg27268486, cg26504980, cg19507068, cg03451029
ISG15	2.89485e-06	0.000954811	0.627257	-0.903779	-2.39077	8	cg23684711, cg20022511, cg21503301, cg08067365, cg22115423, cg08469540, cg25610492, cg22182593
PHKA2	8.43782e-05	0.00643997	0.538434	-0.76127	-2.39001	13	cg14433886, cg08521539, cg05156180, cg02161919, cg07314984, cg09909750
FBXL12	8.43782e-05	0.00643997	0.538434	-0.761243	-2.38992	13	cg22019666, cg20661311, cg09558872, cg00945377, cg19280225, cg25532409, cg14611774, cg26694566, cg03621406
LAIR1	3.2797e-05	0.00390694	0.557332	-0.656472	-2.3899	21	cg10042327, cg21878746, cg06238491, cg24147838, cg18074171, cg10132694, cg01515802, cg09733246, cg20117742, cg17713010, cg21340223
HIST1H2AC	4.12889e-05	0.00443913	0.557332	-0.719146	-2.38928	16	cg16218610, cg20153768, cg07365404, cg05804587, cg23995093, cg25341275, cg19084075, cg09880012, cg25307277
FOXB2	5.44706e-05	0.00524317	0.557332	-0.798284	-2.38777	11	cg13369611, cg20549165, cg13962186, cg13482432, cg13929627
SEC1	2.03334e-05	0.00307562	0.57561	-0.78439	-2.384	12	cg06530960, cg13670615, cg26789053, cg11700415, cg26571142, cg02221863, cg26914390, cg26761504, cg06677660, cg21103306, cg13402773
CLNS1A	2.05463e-05	0.00307562	0.57561	-0.784282	-2.38367	12	cg24534381, cg05960806, cg15593809, cg26577973, cg12195102, cg02939090
POLR2K	2.05463e-05	0.00307562	0.57561	-0.784229	-2.38351	12	cg03857509, cg16187810, cg05983883, cg04414518, cg09851883, cg26495598, cg13919215, cg20769102
UFM1	9.65366e-05	0.00703596	0.538434	-0.758091	-2.38003	13	cg11149688, cg14439324, cg18352063, cg15004706, cg07350703, cg07243519, cg23156934, cg16863212, cg13452070
ZNF57	2.16109e-05	0.00307707	0.57561	-0.782722	-2.37893	12	cg03108330, cg01467419, cg03579738, cg10661629, cg22380472, cg17880703, cg12280168, cg08870433, cg15784913
PCDHB11	4.18129e-05	0.00444633	0.557332	-0.742191	-2.37575	14	cg14065590, cg24127414, cg20214105, cg01401015, cg09286169, cg16049600, cg24533097, cg05852276, cg18417245
CTXN2	3.5256e-05	0.00407976	0.557332	-0.66542	-2.37439	20	cg18042307, cg25445017, cg03612569, cg06714776, cg00508024, cg11300596, cg24495234, cg09141216, cg14798706, cg11439821, cg12556555
NRN1	3.77288e-05	0.00419544	0.557332	-0.651375	-2.37134	21	cg11564981, cg18430295, cg22958129, cg10028717, cg01566449, cg12997637, cg25511429, cg07750782, cg14843586, cg26383307, cg17740417, cg25307691, cg14858978
STAU1	3.62285e-05	0.00412285	0.557332	-0.664283	-2.37033	20	ch.20.1062061F, cg06873027, cg20725261, cg09722420, cg24027572, cg11326640, cg08514994, cg07458471, cg14952389, cg21937284
MZF1	3.62285e-05	0.00412285	0.557332	-0.664067	-2.36956	20	cg07786254, cg22010065, cg18429685, cg10075436, cg09444255, cg05007985, cg26954695, cg23196670, cg19609315, cg13923040
RIPK4	7.0516e-05	0.00607807	0.538434	-0.791935	-2.36878	11	cg14947929, cg25033972, cg09323136, cg05025514, cg27600107, cg09160881, cg11719297, cg12476541, cg01618781
EIF4E2	9.8874e-05	0.00717944	0.538434	-0.715531	-2.36794	15	cg07590839, cg18867375, cg17935173, cg03566780, cg15243454, cg12405341, cg05911928, cg23743058, cg02359411
BCL11A	5.77505e-05	0.00535888	0.557332	-0.712471	-2.36711	16	cg03754165, cg03717201, cg22166290, cg03598080, cg03874092, cg22197434, cg22153873, cg25763031, cg26386740, cg13500074, cg17628370, cg12345955
DRD1	0.00011393	0.00772502	0.538434	-0.752661	-2.36298	13	cg00698685, cg18190187, cg11750900, cg16112129, cg17307280, cg23476076, cg26948603, cg11501905, cg08675262, cg01581781
KCNK12	2.97415e-05	0.0036173	0.57561	-0.777142	-2.36197	12	cg16621816, cg08074851, cg04431946, cg13913015, cg01826863, cg22382953, cg04934807, cg06144198, cg04981611, cg13223402
PCDHGC4	5.07832e-05	0.00499112	0.557332	-0.737121	-2.35952	14	cg23445461, cg19759129, cg26890354, cg06428620, cg11830096, cg00163472
COG4	2.49061e-05	0.0032971	0.57561	-0.709062	-2.35917	17	cg02458208, cg10497173, cg15213605, cg20435469, cg08495858, cg08682991, cg07751125, cg12560006, cg13392715, cg10141839, cg03002232
CITED1	6.49124e-05	0.00574918	0.538434	-0.606916	-2.35827	27	cg03937594, cg11932249, cg03752015, cg02690554, cg18468467, cg11707352, cg18542573, cg22364374, cg23774896, cg00238131, cg21401951, cg14073590, cg14429073, cg03761894, cg10288106, cg05449830, cg15534364, cg17868752, cg05464374, cg10706590
HMGB2	2.34983e-05	0.00326264	0.57561	-0.623831	-2.35713	26	cg03002428, cg00321931, cg11186122, cg23912930, cg09162056, cg03019944, cg23199053, cg02666901, cg20409358, cg12571493, cg16569664, cg24595723, cg25086702, cg27164753, cg06841464
HS3ST2	2.7372e-05	0.00343651	0.57561	-0.708346	-2.35679	17	cg10370599, cg01574663, cg12825577, cg00885682, cg20023231, cg08214995, cg13873813, cg03713642, cg09191731, cg03132773, cg27403265, cg18422586, cg03033688, cg03757784
SYDE2	3.53045e-05	0.00407976	0.557332	-0.775415	-2.35672	12	cg15500929, cg22949578, cg15444788, cg17019143, cg12076664, cg09981576
FAM161A	7.37536e-05	0.00613352	0.538434	-0.809375	-2.35484	10	cg14812448, cg06523404, cg14951953, cg01203426, cg16910805, cg15981295, cg20913491
HOXD8	2.32928e-05	0.003261	0.57561	-0.629183	-2.35365	24	cg17863912, cg00035316, cg05115332, cg11969556, cg11261698, cg15520279, cg25423004, cg18448949, cg09238180, cg19384289, cg23464101, cg26408914, cg20539752, cg20732478, cg03321133, cg14473102, cg02347773, cg15808943
NKX2-4	2.93447e-05	0.00361423	0.57561	-0.707384	-2.35359	17	cg12688121, cg13597851, cg05227131, cg18736063, cg22204479, cg11667020, cg21200656, cg23984929, cg27147819, cg21200408, cg20049415
TTL	8.99185e-06	0.00188152	0.593325	-0.888763	-2.35105	8	cg20401875, cg01217204, cg18442986, cg11310125, cg19895503
NDUFB3	4.44953e-05	0.00462002	0.557332	-0.658659	-2.35026	20	cg03075561, cg11907102, cg18143488, cg11937346, cg17079352, cg04865026, cg07329149, cg06725479, cg13235654, cg02198983, cg04514983, cg02994018
KLF14	1.92652e-05	0.00295198	0.57561	-0.643853	-2.35012	22	cg07955995, cg09529138, cg02778245, cg06533629, cg18645297, cg03914913, cg17317023, cg08097417, cg04528819, cg00094518, cg09823095
SOCS2	6.5353e-07	0.000363363	0.659444	-0.539741	-2.34932	48	cg09741588, cg04641905, cg17051560, cg14944190, cg26944263, cg13179085, cg17421072, cg15125424, cg06831658, cg22624017, cg04409030, cg19007602, cg25507371, cg24117442, cg15977894, cg27619149, cg20383078, cg15773726, cg10228697, cg02276860, cg22125370, cg01040535, cg03327347
FGFR2	2.27413e-06	0.000858285	0.627257	-0.568984	-2.34823	38	cg25052156, cg05368033, cg17681491, cg06791446, cg02210151, cg10379346, cg15049101, cg13437682, cg07250222, cg01385327, cg23444251, cg13175830, cg17710779, cg22633036, cg22762615, cg18566515, cg11430259, cg12835048, cg11836372, cg02412684, cg17997363
GABRB2	5.49643e-05	0.00524317	0.557332	-0.629869	-2.34778	23	cg15066954, cg19971650, cg01939681, cg11252048, cg24171764, cg00524310, cg27310319, cg10037414, cg11042722, cg00252615, cg04055989, cg09482986
NPR3	5.81051e-05	0.00535888	0.557332	-0.629352	-2.34586	23	cg01822624, cg17350226, cg19618483, cg13605526, cg22851125, cg16267343, cg17630392, cg07663789, cg24164873, cg11620238, cg01252672, cg10832005
NOVA1	4.08676e-05	0.00441824	0.557332	-0.771634	-2.34523	12	cg07543626, cg11146971, cg20478129, cg20961943, cg02014003, cg15602241, cg18468511, cg23502778, cg24236288, cg16791424
APLF	0.000162632	0.0102091	0.518848	-0.746662	-2.34415	13	cg04341202, cg03995206, cg00831048, cg22885367, cg03239202, cg16380618, cg20195957, cg26431750, cg03215730
CCDC50	6.42652e-05	0.0057367	0.538434	-0.73215	-2.34361	14	cg25235397, cg04672043, cg17559335, cg00473167, cg09688588
AIDA	4.54679e-05	0.00465687	0.557332	-0.656747	-2.34344	20	cg09533004, cg07031916, cg11177955, cg16307860, cg13210720, cg15559578, cg12700102, cg19013742, cg09820183, cg16542021, cg17160590, cg27654805, cg17069573
MKX	2.90328e-05	0.00359859	0.57561	-0.58146	-2.34136	31	cg05485137, cg03462329, cg05381746, cg08696727, cg13457209, cg08815081, cg17389504, cg14965220, cg16033053, cg18802021, cg17910121, cg07964848, cg02249292, cg19488213, cg06949394, cg09713234, cg14947429, cg06765035
GPR64	8.19031e-05	0.00637533	0.538434	-0.804736	-2.34134	10	cg01818727, cg08744017, cg24000218, cg02859554, cg17119559, cg01381545, cg16641638
HIST1H2AM	9.25061e-05	0.00679309	0.538434	-0.782501	-2.34056	11	cg20851465, cg06797525, cg07218048, cg19459093, cg10070969, cg04062567, cg16807643, cg01196495
TTC37	2.43291e-05	0.0032971	0.57561	-0.671477	-2.33777	19	cg25208046, cg12310600, cg03977394, cg18106800, cg26657230, cg07701281, cg05177841, cg01559436, cg23396403, cg20172593, cg14587401, cg09085978
GIN1	8.29856e-05	0.00640833	0.538434	-0.703132	-2.33608	16	cg25415877, cg21673079, cg07880297, cg03165769, cg15364663, cg07194689, cg27013295, cg05173698, cg05452345, cg01077267, cg08295258
GABRA2	2.21484e-05	0.00312325	0.57561	-0.639962	-2.33592	22	cg21540437, cg21820677, cg12205729, cg12858909, cg25145765, cg24244752, cg07813249
COL11A2	1.182e-05	0.00226711	0.593325	-0.572359	-2.33384	34	cg22190028, cg17161718, cg02452416, cg18744458, cg09708959, cg11652360, cg00090619, cg10010480, cg12936423, cg05615552, cg27181765, cg03473348, cg03949284, cg03882777, cg04770813, cg27287254, cg06205432, cg04138361
HOXA2	2.60194e-05	0.00334586	0.57561	-0.619574	-2.33222	25	cg04737131, cg24058604, cg22943986, cg23979631, cg06166490, cg04027736, cg23206851, cg02225599, cg06401979, cg20087093, cg13985518, cg06769202, cg04481096, cg17353412, cg09908750, cg05921905, cg09871315, cg00445443, cg01217984, cg02979457, cg06055873
TIPIN	5.2896e-05	0.00512118	0.557332	-0.76725	-2.3319	12	cg16142844, cg00801568, cg22492020, cg12541836, cg08479319, cg13362147, cg11164506, cg09262369
MGC2889	0.000104387	0.00730711	0.538434	-0.77882	-2.32955	11	cg07081465, cg08659357, cg09036563, cg19713057, cg08376864, cg20436262, cg24710320
RAB43	3.42222e-05	0.00403615	0.557332	-0.62248	-2.32858	24	cg21270508, cg05985447, cg03163878, cg00623328, cg02582682, cg05035384, cg07887806, cg08694555, cg24159435
ATF6	0.000204514	0.0114363	0.518848	-0.741498	-2.32793	13	cg26591879, cg07804963, cg22608657, cg15994321, cg01096422, cg10309957, cg00365593, cg09175582
TNFRSF21	0.000107782	0.00746419	0.538434	-0.777497	-2.32559	11	cg00407962, cg21998325, cg26422153, cg09130162, cg11848539, cg23989552, cg22100731, cg22464186, cg14332112
COL4A2	5.80565e-05	0.00535888	0.557332	-0.765054	-2.32523	12	cg26875813, cg22757824, cg15262516, cg21938148, cg24089600, cg15871127, cg17541528, cg20327444, cg13596497
SOX21	2.45074e-05	0.0032971	0.57561	-0.636553	-2.32347	22	cg02736420, cg16797691, cg00800383, cg19063972, cg11699435, cg27442308, cg01212887, cg00068160, cg16201674, cg14493161, cg12533095, cg23111830, cg10738239, cg18368297
NR2E1	5.7177e-05	0.00534935	0.557332	-0.651108	-2.32332	20	cg18918349, cg08616702, cg08640634, cg07411432, cg12463600, cg18093751, cg21239311, cg24104938, cg09343711, cg24225517, cg03383382, cg02062480, cg03958979, cg00453817
ECD	0.000102416	0.00730711	0.538434	-0.699254	-2.32319	16	cg25138168, cg13745964, cg24044147, cg22981519, cg04381006, cg03701779, cg07771331, cg08879241, cg11829033, cg04749667, cg15213114
CWC22	0.000104367	0.00730711	0.538434	-0.698774	-2.3216	16	cg21102739, cg12167790, cg18778932, cg04967250, cg10458859, cg19183433, cg20873039, cg01881094, cg02491759, cg06548069, cg00460911, cg15975990, cg20057831, cg23417306
ACTL6A	8.7634e-05	0.00657406	0.538434	-0.725216	-2.32141	14	cg10112003, cg03839554, cg03667091, cg07261848, cg04903136, cg25575835, cg25958740, cg25198545
USP42	0.000202439	0.0114032	0.518848	-0.701335	-2.32096	15	cg08109855, cg16511870, cg02517372, cg25297425, cg22387890, cg07300502, cg17911360, cg08635118, cg04213338
GAD2	8.94316e-05	0.00666796	0.538434	-0.724975	-2.32064	14	cg02129343, cg00733780, cg24097797, cg15850954, cg12527175, cg24820783, cg09056181, cg11328303, cg25835733
SSU72	5.89166e-05	0.00538271	0.557332	-0.763154	-2.31945	12	cg05338320, cg16848272, cg03528848, cg05433637, cg04637864, cg07090025, cg08271362, cg19158176, cg20755353, cg13424097
NKIRAS1	3.73775e-05	0.00418026	0.557332	-0.613721	-2.31893	26	cg22897779, cg06259441, cg05571164, cg06151625, cg06949789, cg12117273, cg25466588, cg15720127, cg03749093, cg00739272, cg07002286, cg10113231, cg05036608, cg26266876, cg03754264, cg16772120
TPX2	4.46333e-05	0.00462002	0.557332	-0.696195	-2.31636	17	cg23807894, cg02020146, cg25649779, cg02256410, cg14326210, cg21838233, cg09863659, cg10476558, cg09877164, cg16338822
BRUNOL4	1.16564e-05	0.00226711	0.593325	-0.577155	-2.31615	32	cg12161122, cg12466737, cg03151187, cg25842602, cg25023275, cg19853833, cg24107979, cg13138137, cg14350197, cg06761921, cg13382322, cg14839351, cg17227156, cg14423557, cg17973164
ZNF790	1.39163e-05	0.00235488	0.593325	-0.564289	-2.31583	36	cg14870914, cg02966453, cg01202997, cg18876786, cg19831147, cg26095210, cg10734240, cg22753918, cg22334559, cg16540393, cg18583246, cg10211019, cg07056149, cg24775172, cg07684889, cg22379207
TRMT12	0.000112874	0.00770711	0.538434	-0.774136	-2.31554	11	cg26547947, cg22853986, cg25375711, cg26141173, cg07349283, cg11829072, cg09825146
DHX29	6.49959e-05	0.00574918	0.538434	-0.648436	-2.31378	20	cg09129895, cg08591579, cg07589143, cg00798886, cg22127314, cg19079372, cg24188111, cg09230732, cg05225431
ZNF224	9.12292e-05	0.00676038	0.538434	-0.722751	-2.31352	14	cg23041193, cg25952543, cg03486540, cg18728325, cg18244544, cg10646633, cg26649251, cg23986727, cg03600886, cg22012835
PCDHB7	4.75924e-05	0.00479869	0.557332	-0.693946	-2.30888	17	cg22190023, cg25026992, cg13283199, cg11809091, cg03780733, cg01228941, cg21038220, cg16583552, cg03022653, cg19520087
TP53TG1	0.000243297	0.012691	0.518848	-0.697268	-2.3075	15	cg16063666, cg18952098, cg11252776, cg19642189, cg12969170, cg07582133, cg02673015, cg14001567, cg21526343, cg13338302
ASTN2	3.29259e-05	0.00390694	0.557332	-0.632029	-2.30696	22	cg04495116, cg02554246, cg13557688, cg14090923, cg00213714, cg27234421, cg21456112, cg09693243, cg13647523, cg13412550, cg15586196, cg08003168
MOBKL3	7.18375e-05	0.00607807	0.538434	-0.646249	-2.30598	20	cg13575058, cg01366059, cg19965941, cg10951630, cg02817981, cg08758080, cg26641578, cg00083139, cg10972865, cg04056179, cg11442734
TMEM187	7.47696e-05	0.00616532	0.538434	-0.645843	-2.30453	20	cg23124111, cg13937627, cg04764476, cg06809565, cg03177323, cg03672915, cg11778030, cg03189022, cg09275137, cg10155960, cg05103731, cg07086565, cg06022838, cg08627233, cg21960840, cg09222696
PNRC1	7.26779e-05	0.00612256	0.538434	-0.758131	-2.30419	12	cg06985640, cg25100365, cg09374648, cg18317589, cg05624707, cg19448269, cg07069107, cg06823247
ALKBH1	0.000107487	0.00746419	0.538434	-0.719457	-2.30297	14	cg14525832, cg03429278, cg09272629, cg20385229, cg06226944, cg08806711, cg26035522, cg21974996, cg14094681, cg05010333, cg15046735, cg02018089
TNFAIP1	7.67243e-05	0.00627334	0.538434	-0.645294	-2.30257	20	cg26663469, cg10112559, cg06312003, cg11656552, cg05248886, cg18712119, cg12547038, cg16326696
SERINC1	0.000288416	0.0140666	0.498493	-0.733254	-2.30205	13	cg17245576, cg09319194, cg01234950, cg24758027, cg02834886, cg20185868, cg10651306, cg10472759, cg03902233
ADAMTS16	7.77017e-05	0.00630355	0.538434	-0.644874	-2.30107	20	cg16068490, cg04136610, cg19452011, cg25536014, cg10881764, cg16892318, cg00127167, cg22784954, cg01717727, cg01085224, cg15048991, cg15409013, cg18503643, cg03209854, cg07834743
C2CD3	3.8194e-05	0.00422304	0.557332	-0.630351	-2.30083	22	cg27203558, cg16400434, cg07712444, cg21493666, cg16399312, cg01452167, cg00469635, cg23558650, cg25310822, cg10546904, cg02284889, cg23122401
LINC-PINT	0.000138334	0.00882615	0.518848	-0.768895	-2.29986	11	cg02221131, cg03072329, cg00489486, cg00280928, cg05222316, cg27284424, cg24102404
LRRIQ1	0.0001111	0.00763962	0.538434	-0.718289	-2.29924	14	cg02645710, cg14113610, cg12373573, cg16020853, cg20080079, cg10379050, cg21013725, cg13239252, cg23680282, cg01522826
TSPAN19	0.0001111	0.00763962	0.538434	-0.718289	-2.29924	14	cg02645710, cg14113610, cg12373573, cg16020853, cg20080079, cg10379050, cg21013725, cg13239252, cg23680282, cg01522826
CNTNAP5	0.000148518	0.00935325	0.518848	-0.767585	-2.29594	11	cg01308258, cg08790440, cg18582824, cg03696599, cg08523865, cg11344566, cg12919006, cg13358636
OSR2	5.07056e-05	0.00499112	0.557332	-0.607226	-2.29439	26	cg02409878, cg13016314, cg22920700, cg18428626, cg22524061, cg07358855, cg03157027, cg14657725, cg02952828, cg25167736, cg26294710, cg26570179
NUP205	0.000305895	0.0145392	0.498493	-0.73072	-2.2941	13	cg03407666, cg22761619, cg15394787, cg14182420, cg23885884, cg19477020, cg27145339, cg25119219, cg06561325, cg07577263, cg00492233
C20orf103	1.42199e-05	0.00238551	0.593325	-0.905488	-2.29371	7	cg06450650, cg03207439, cg12650655, cg09160017, cg09119967, cg20191310
ZNF677	0.000189297	0.0110622	0.518848	-0.787822	-2.29213	10	cg24685755, cg04154138, cg18335068, cg25404339, cg21907914, cg03217253, cg06506966, cg09379485
SASH1	8.47191e-05	0.00643997	0.538434	-0.753733	-2.29082	12	cg19472216, cg00380172, cg09381701, cg22474886, cg06492708, cg11870037, cg06081609, cg06166242, cg01452444, cg08365388
TWIST1	5.708e-05	0.00534935	0.557332	-0.60568	-2.28855	26	cg26279021, cg27334919, cg00240432, cg20052718, cg09799658, cg10126205, cg17839237, cg10420952, cg12307484, cg21424940, cg04904385, cg11147786, cg02400740, cg20121142, cg14391419, cg26818735, cg10624122
ZNF503-AS2	8.72993e-05	0.00657406	0.538434	-0.752939	-2.28841	12	cg04424015, cg03612462, cg19271099, cg05582577, cg13487762
SLC3A2	5.85807e-06	0.00144301	0.610527	-0.54769	-2.28796	40	cg07611106, cg00321150, cg16663674, cg01382671, cg10923246, cg03601585, cg05115468, cg23385854, cg03193698, cg24135964, cg08176194, cg10922289, cg13402055, cg02192780, cg22327576, cg11310820, cg12276228, cg03438692
FUNDC1	0.000130713	0.00851811	0.518848	-0.819823	-2.28651	9	cg04565250, cg16043943, cg01573544, cg07658614, cg21465470, cg10247267
ITPR2	4.45156e-05	0.00462002	0.557332	-0.626144	-2.28548	22	cg01103812, cg10603826, cg21094300, cg10037905, cg26320601, cg02569086, cg15620385, cg23425324, cg14847975, cg09257092, cg23332732, cg27279652, cg16846691, cg19407459, cg04837533
PCDHGA12	5.87709e-05	0.00538271	0.557332	-0.656131	-2.28434	19	cg07489502, cg21185686, cg07802710, cg24272454, cg21627409, cg12304520, cg04080041, cg23082339, cg02267483, cg07730329, cg07539798, cg02452944
CDH8	0.00014457	0.00913419	0.518848	-0.587599	-2.28321	27	cg05946623, cg08269733, cg14460291, cg06831576, cg08623357, cg17995563, cg06830659, cg07244927, cg02172312, cg13397057
ZNF226	0.000143617	0.00910353	0.518848	-0.712769	-2.28157	14	cg03559973, cg03573702, cg19331658, cg22229043, cg01627741, cg19836894, cg00023168, cg02896355, cg10138008
MCM4	0.000313871	0.014849	0.498493	-0.68916	-2.28066	15	cg03429865, cg11220133, cg07417733, cg00318618, cg10477468
SOX2	8.04711e-05	0.00630355	0.538434	-0.573267	-2.27955	29	cg00666105, cg19462523, cg25933341, cg01340005, cg04948892, cg18148179, cg09530873, cg23087992, cg22530053, cg12930100, cg11142406, cg17051733, cg21635203, cg14783675
TMPO	0.000235386	0.0125153	0.518848	-0.783481	-2.2795	10	cg11641742, cg04484232, cg26744087, cg11625178, cg12066438, cg16245726, cg21439867
WTIP	2.16629e-05	0.00307707	0.57561	-0.899733	-2.27913	7	cg10771931, cg06177396, cg11869770, cg04928251, cg11374335, cg13011006, cg24916013
RPUSD4	0.000178495	0.0107083	0.518848	-0.685808	-2.27852	16	cg13169525, cg00617979, cg03984120, cg02396009, cg09845187, cg20171807, cg23985147, cg02798749, cg21553893, cg20278498, cg24625240, cg04250867
SPINT2	0.000101128	0.00728874	0.538434	-0.74965	-2.27841	12	cg13301014, cg18354742, cg22522066, cg19767215, cg16655905, cg19261810, cg27176870, cg15375239
CATSPERG	0.000180446	0.0107385	0.518848	-0.685715	-2.27821	16	cg09094448, cg26243263, cg09999441, cg17881946, cg23894862, cg22006386, cg03251068
ARSB	0.000336157	0.0151778	0.498493	-0.687706	-2.27585	15	cg26802063, cg22224068, cg24166916, cg18828365, cg17845680, cg11541897, cg11769606, cg25318491, cg18856359
TUBE1	0.000339871	0.01531	0.498493	-0.687373	-2.27475	15	cg10078446, cg10310756, cg15155408, cg13079941, cg18350186, cg23586272, cg06878278
LRRTM1	7.78126e-05	0.00630355	0.538434	-0.683434	-2.2739	17	cg26355577, cg12078605, cg26157270, cg00465284, cg01536445, cg27629977, cg12945120, cg19925939, cg21621248, cg02856109, cg08154280, cg11231249
MARCH11	7.97951e-05	0.00630355	0.538434	-0.682924	-2.27221	17	cg23892687, cg21901718, cg16150752, cg11452391, cg25092681, cg21582253, cg17030173, cg09017434, cg00339556, cg23065934, cg19916771, cg18325622, cg17712694
PRCP	0.000196052	0.0111882	0.518848	-0.683166	-2.26974	16	cg24536410, cg03602013, cg09144302, cg05009394, cg16249821, cg15838075, cg02125600, cg13494368, cg07714534, cg04891861
FAM38B	0.0001115	0.00764013	0.538434	-0.746435	-2.26864	12	cg24362812, cg10023530, cg23556443, cg03602280, cg03117976, cg25995825, cg06510438, cg03686593, cg10567810
WNT3	0.000399412	0.0166793	0.498493	-0.685128	-2.26732	15	cg00817598, cg02017282, cg03186851, cg06785746, cg07879727, cg26575738, cg11142826, cg00126034, cg15237742, cg24114556
LRIG3	0.000169388	0.0104974	0.518848	-0.607523	-2.26449	23	cg03737073, cg26947450, cg10708905, cg07124520, cg02499494, cg19536810, cg05418657, cg06229867, cg15822795, cg05162721, cg06638827, cg26049489, cg03590296, cg25773344, cg24685998
MLLT3	0.000213686	0.0116449	0.518848	-0.680833	-2.26199	16	cg27399667, cg18264687, cg09730361, cg21683774, cg08287909, cg25887254, cg24383891, cg09273951, cg27041724, cg13621212
C5orf39	0.000429274	0.0174398	0.498493	-0.683465	-2.26182	15	cg10938702, cg17269733, cg05551979, cg08205639, cg09741070, cg26942801, cg19950474, cg04122815, cg25564121, cg14681629, cg00257271
SCAMP1	0.000128787	0.00849557	0.518848	-0.743864	-2.26083	12	cg03056766, cg18240496, cg14136506, cg12862950, cg24151027, cg12126786, cg06994657, cg04223645, cg08041208
ST7L	7.86869e-05	0.00630355	0.538434	-0.60398	-2.25937	24	cg21499782, cg19260885, cg05465104, cg05807768, cg18768400, cg17861791, cg00224275, cg03503114, cg17081063, cg12664323, cg06157285
SNAP91	7.97874e-05	0.00630355	0.538434	-0.603853	-2.2589	24	cg17767285, cg06793672, cg22782283, cg18213472, cg01965307, cg24842733, cg24638849, cg09227138, cg21704750, cg26133272, cg24190603, cg05602531, cg01828334, cg15950068, cg21688264, cg07335294, cg15810756, cg09389460
TSG101	0.000474285	0.0186834	0.498493	-0.719483	-2.25882	13	cg13383490, cg26623416, cg18469778, cg01837280, cg19001237, cg03425219, cg19225095, cg19409990, cg12912785
CD3EAP	0.000124741	0.00825664	0.518848	-0.63286	-2.2582	20	cg24415941, cg22090640, cg01870249, cg04540976, cg03208830, cg03900104, cg23953174, cg00146460, cg06663668, cg17427418, cg06237458
FZD10	0.000120107	0.00805962	0.538434	-0.663046	-2.25819	18	cg05790197, cg17537177, cg21386611, cg18209212, cg16498194, cg27232145, cg09048530, cg07742404, cg13755349, cg23054883
DDN	0.000274622	0.0136679	0.498493	-0.754067	-2.25551	11	cg03008550, cg25636132, cg19891951, cg22086322, cg20513643, cg05978988, cg01915076, cg01163298, cg24707051
HOXC10	6.19418e-05	0.00558049	0.538434	-0.617896	-2.25537	22	cg09468523, cg13426316, cg27247092, cg22711405, cg05090195, cg08737755, cg16253259, cg05420790, cg20403938, cg21898463, cg00699029
TOM1L2	0.000503928	0.019297	0.477271	-0.681259	-2.25452	15	cg12978198, cg00463594, cg11499431, cg07327864, cg22376739, cg20650513, cg08878390, cg19003389, cg00365569
C3orf25	0.000249663	0.0127776	0.498493	-0.808009	-2.25356	9	cg05958749, cg14779951, cg17468185, cg08416723, cg10474404, cg19547144, cg09650575, cg16516295
DLL4	0.000194252	0.0111753	0.518848	-0.703979	-2.25343	14	cg12064947, cg16895710, cg25204272, cg26212303, cg01323926, cg13579562, cg22276692, cg04946603, cg03421485, cg21215323, cg07873251
PCDHB6	0.000124078	0.00825664	0.518848	-0.661489	-2.25289	18	cg04743250, cg09178190, cg16622906, cg23596123, cg08212862, cg02299843, cg23247945, cg27066201, cg00617875, cg26866168, cg02403883, cg05953939, cg15038110, cg24811352
B3GALNT2	0.000367231	0.0160591	0.498493	-0.773981	-2.25186	10	cg17498841, cg26050004, cg00265415, cg03209127, cg04292187, cg19879264, cg24660828
PHLDA2	7.30993e-05	0.00613152	0.538434	-0.569692	-2.25172	28	cg26799802, cg11961618, cg06001652, cg04475877, cg24495982, cg14589014, cg19418924, cg25555424, cg24860475, cg16549085, cg04746197, cg18140683, cg01946707
PDHX	0.000134563	0.00867082	0.518848	-0.630488	-2.24974	20	cg16029975, cg25931580, cg09194750, cg03305906, cg14686008, cg18508148, cg08318506, cg07253191, cg11622362, cg20541753, cg20869710, cg17147794, cg15988239
ARL15	0.000301914	0.0144905	0.498493	-0.751974	-2.24925	11	cg18857021, cg00166213, cg15800161, cg17844160, cg18784506, cg01965598, cg17878037, cg01196404, cg13717023, cg03670816
ALOXE3	0.000194638	0.0111753	0.518848	-0.603275	-2.24866	23	cg07597269, cg13969606, cg06841486, cg09622941, cg17320454, cg22975147, cg25365794, cg12731137, cg06219041, cg12654743, cg01762263, cg10392768, cg11007542, cg14880497
STRA13	0.00023721	0.0125779	0.518848	-0.676629	-2.24803	16	cg21828899, cg19001231, cg15578811, cg11040439, cg08086652, cg04489846, cg04875987, cg17910679, cg05493356, cg17241816, cg00056628, cg10645943
PAX1	0.000201513	0.0113996	0.518848	-0.702263	-2.24794	14	cg17620199, cg01783070, cg22058250, cg03140968, cg04811512, cg19054524, cg08448701, cg04881131, cg16767801
DNAH7	0.000373847	0.0161668	0.498493	-0.771759	-2.24539	10	cg00369640, cg19374305, cg19655195, cg03888814, cg13045813
CDC37L1	0.000565628	0.0203498	0.477271	-0.714579	-2.24342	13	cg20487020, cg01296653, cg01388957, cg08350995, cg17911882, cg15661837, cg08209718, cg13433942, cg23492569
BCAS3	9.13658e-05	0.00676038	0.538434	-0.644195	-2.24279	19	cg00410467, cg03109505, cg02553987, cg25924583, cg08032519, cg14633562, cg23546619, cg04533248, cg02151358, cg07834876, cg03409120, cg23120942, cg03821916, cg00170973, cg10390922
COL9A2	0.000353118	0.0157025	0.498493	-0.749634	-2.24225	11	cg23847109, cg26011014, cg18186394, cg12733396, cg06063903, cg04100190, cg01728173, cg26710722
DKK1	0.000586707	0.0207601	0.477271	-0.714056	-2.24178	13	cg11988964, cg07684796, cg09445939, cg02162906, cg02302582, cg26677741, cg25158147, cg12621514, cg11931116, cg27411220, cg27591349
RXFP3	9.33413e-05	0.00682865	0.538434	-0.643813	-2.24146	19	cg12238343, cg10795738, cg13349651, cg03909500, cg02640041, cg00516449, cg26986911, cg26390889, cg18294646
ALX1	0.000614812	0.021101	0.477271	-0.713542	-2.24017	13	cg25678815, cg14996220, cg04245590, cg10794058, cg02409351, cg13916459, cg16413687
METTL11B	8.23908e-05	0.00638775	0.538434	-0.846832	-2.24013	8	cg03192897, cg20742415, cg03001143, cg19303898, cg19448426
HOXD10	0.000226929	0.0121654	0.518848	-0.699806	-2.24007	14	cg13217260, cg11735755, cg07625529, cg05979020, cg03043789, cg02193236, cg17489939, cg20649017, cg18115040
RPRML	0.000556186	0.0203061	0.477271	-0.675838	-2.23658	15	cg07142555, cg13825374, cg03347044, cg08631151, cg08269321, cg16179976, cg13665025
AKD1	0.000176316	0.0107083	0.518848	-0.614109	-2.23567	21	cg27392242, cg20917554, cg23959518, cg07877852, cg06694616, cg25926008, cg03976567, cg02304879, cg15847400, cg03909712, cg05512669, cg14372919
PDCD11	7.88827e-05	0.00630355	0.538434	-0.61247	-2.23557	22	cg07734351, cg20502234, cg05717160, cg04165840, cg07086898, cg03963494, cg24315770, cg03269171, cg11814667, cg05877823, cg04964416, cg00594003, cg07867052, cg20475000, cg12628033, cg26719024
HOXA9	0.000102241	0.00730711	0.538434	-0.641809	-2.23448	19	cg25999578, cg20399871, cg27009703, cg26365299, cg03464573, cg12600174, cg05065989, cg20741169, cg26521404, cg26476852, cg18447772, cg21001184, cg15506609
MEIS2	1.00142e-05	0.00205133	0.593325	-0.541246	-2.23375	38	cg23186959, cg23690033, cg12015310, cg00366722, cg11282531, cg18393040, cg10752869, cg22112443, cg19416470, cg00797346, cg25381383, cg14556531, cg13800209, cg16409367, cg17850518, cg15507730, cg20515302, cg04998702, cg23137807, cg24504442, cg08688512, cg02917381
SLC24A4	7.89732e-05	0.00630355	0.538434	-0.593291	-2.23329	25	cg01064918, cg23755704, cg03242511, cg12159314, cg04556542, cg25331196, cg11294692, cg00452561, cg18229521, cg18232401, cg02240446, cg22138430
MRI1	0.000192833	0.0111753	0.518848	-0.734797	-2.23327	12	cg24115922, cg18631292, cg25755428, cg14272688, cg16474696, cg01530988, cg24025995, cg16188681, cg20555481
SOX4	0.000104226	0.00730711	0.538434	-0.641312	-2.23275	19	cg03203320, cg23148651, cg06170053, cg00792966, cg22671938, cg05281544, cg19360886, cg08718230, cg24249751, cg13995516, cg02301209, cg23345561, cg08950757
ATG4C	0.000563652	0.0203498	0.477271	-0.674594	-2.23246	15	cg24874286, cg16739396, cg25613600, cg14143781, cg13050766, cg03370542, cg02580604, cg20595745
KIAA1524	0.000169921	0.0104974	0.518848	-0.625539	-2.23208	20	cg18452149, cg15763344, cg05772678, cg07413063, cg05888082, cg09720372, cg21972470, cg13977080, cg13901143, cg01457752, cg16279940
TBX5	2.78092e-06	0.000949416	0.627257	-0.506687	-2.23193	51	cg17462200, cg16458436, cg10392177, cg08807097, cg12670347, cg08318726, cg09623338, cg05555207, cg11841394, cg08087594, cg09042277, cg16805360, cg14264795, cg26196480, cg16559598, cg00756451, cg16605327, cg20426571, cg03569640, cg13628942, cg15025170, cg00182639, cg16517851, cg14431443, cg23820885, cg10077319, cg04685570, cg03843000, cg25079102, cg16249035, cg05929882, cg06911121, cg21907579
ANAPC1	0.000241452	0.012691	0.518848	-0.697246	-2.23188	14	cg24712005, cg23215929, cg05928219, cg18830857, cg00980776, cg11700429, cg08852667
PCDH10	0.000171723	0.0105417	0.518848	-0.655255	-2.23165	18	cg14410319, cg27600205, cg02043159, cg14146100, cg07665387, cg06667761, cg09693004, cg02114924, cg00945238, cg09221867, cg04035209, cg01408654
ASNA1	0.000678049	0.022251	0.477271	-0.710799	-2.23156	13	cg11834844, cg25642212, cg05085886, cg07751341, cg08311015, cg08205843, cg02914419
SUSD4	0.000203256	0.0114032	0.518848	-0.734153	-2.23131	12	cg12770149, cg00172597, cg12307840, cg18020547, cg03200052, cg23494458, cg04232325, cg21447550, cg07605211, cg15100599
SNORD59A	0.000678049	0.022251	0.477271	-0.710623	-2.231	13	cg22012054, cg22870344, cg06679265, cg03249590, cg16067781, cg01068913
RIOK2	0.000380544	0.0163114	0.498493	-0.745598	-2.23017	11	cg10521413, cg06664872, cg14081015, cg12346467, cg22512085, cg16537383, cg22971398
C2orf56	0.000685075	0.0223684	0.477271	-0.710345	-2.23013	13	cg02625745, cg25240445, cg07049977, cg05882878, cg06359167, cg05257610, cg16863796, cg27274558, cg25805189, cg00065921
DDIT4L	0.000593514	0.0208857	0.477271	-0.673708	-2.22953	15	cg27062369, cg18714412, cg15598154, cg08663159, cg09488621, cg19685627, cg25007312
WNT2	0.00020673	0.0114942	0.518848	-0.733271	-2.22863	12	cg17339147, cg27331524, cg07697895, cg01830294, cg01250407, cg07683820, cg20586431, cg15647515
PRAC	0.000600979	0.0209873	0.477271	-0.673267	-2.22807	15	cg17444839, cg04574034, cg04618333, cg13597528, cg09302903, cg14230397, cg09866983, cg08886727, cg20094830, cg00960395
CACNB2	1.24656e-05	0.00226711	0.593325	-0.51112	-2.22805	47	cg05351658, cg25327888, cg21191915, cg26576398, cg14094927, cg07262635, cg22269608, cg20185017, cg02635932, cg18959207, cg05719612, cg20940700, cg15720089, cg05720640, cg06159486, cg24128066, cg21778991, cg22858500, cg16108246, cg02456226
HOXB7	0.000299942	0.0144835	0.498493	-0.670195	-2.22665	16	cg11149743, cg23730436, cg21564235, cg17468987, cg25489169, cg06493080, cg24766650, cg09357097, cg20510845, cg09998632, cg10232654, cg06856188
SMC1A	0.000394257	0.0166066	0.498493	-0.743551	-2.22405	11	cg12221068, cg11449070, cg07143052, cg14993456, cg01404988, cg18741915, cg22311608, cg04932149
MRPL50	0.00048633	0.0189659	0.498493	-0.764397	-2.22397	10	cg14383545, cg21054287, cg21746459, cg02512375, cg00305046, cg05231631, cg07472329, cg17687519
MPHOSPH10	0.000185619	0.0109128	0.518848	-0.652948	-2.2238	18	cg20921688, cg20382932, cg04049556, cg01112927, cg23513644, cg10109585, cg20516151, cg01136571, cg15638547, cg19510321, cg15822934, cg20854010, cg17464212, cg21214953, cg08366196
C9orf85	0.000185619	0.0109128	0.518848	-0.652934	-2.22375	18	cg05495292, cg13747066, cg19123593, cg01167496, cg00088282, cg05595556, cg08910914, cg00034039, cg14998310, cg18627568, cg18934139, cg01873645, cg03117585, cg08827890, cg09705461
MMP16	0.000394257	0.0166066	0.498493	-0.7434	-2.2236	11	cg05033271, cg26756083, cg24456365, cg01673994, cg16852892, cg11536457, cg12818557
CPEB3	2.36399e-05	0.00326264	0.57561	-0.535922	-2.22325	37	cg26764799, cg17164745, cg19032306, cg06195279, cg23310314, cg02843010, cg26255741, cg24318495, cg09732460, cg16850511, cg00720072, cg06010382, cg04610534, cg05062679, cg05125693, cg20260563, cg05117785, cg23812778, cg00388521, cg00870849, cg23387109
SNORD28	0.000113914	0.00772502	0.538434	-0.594157	-2.22262	24	cg07611106, cg00321150, cg16663674, cg01382671, cg03601585, cg05115468, cg23385854, cg24135964, cg03438692, cg07297802, cg21733363, cg27033919, cg03851309
ZDHHC11	0.000414827	0.0169948	0.498493	-0.742674	-2.22143	11	cg26596734, cg02540781, cg23091057, cg12157377, cg15089370, cg26853976, cg20584011
CADPS	0.000645772	0.0217417	0.477271	-0.670948	-2.22039	15	cg10748355, cg11905007, cg21534264, cg13491481, cg21458907, cg14080371, cg22930588, cg25947544
ADAM5P	0.000403402	0.0167382	0.498493	-0.796009	-2.22009	9	cg07387286, cg11199639, cg19659741, cg14742937, cg10327428, cg11583762
HHIP	0.000241474	0.012691	0.518848	-0.729671	-2.21769	12	cg12936746, cg14580567, cg03446608, cg04923560
BLOC1S3	0.000130033	0.00851811	0.518848	-0.636971	-2.21764	19	cg27567587, cg00814580, cg19703494, cg22769810, cg07928695, cg11961288, cg15150615, cg18405297, cg15176664, cg04881464, cg23256630, cg00555293, cg02713563, cg11589573
TGS1	0.000203335	0.0114032	0.518848	-0.621277	-2.21688	20	cg16085986, cg05647005, cg24596592, cg07525052, cg09880117, cg03004552, cg17128666, cg12444845, cg23233138, cg10944437, cg16760490
NFE2L1	0.000783791	0.0242299	0.477271	-0.70606	-2.21668	13	cg06069861, cg05340686, cg04977109, cg03777405, cg06826431, cg24241925, cg16989148, cg01307671, cg06740897, cg03715070, cg09793807, cg04655372
ZNF566	0.000281242	0.0139077	0.498493	-0.594407	-2.2156	23	cg10767909, cg13073894, cg07753791, cg21076702, cg22886237, cg22289948, cg08475025, cg11441935, cg22852149, cg12711165, cg18945691, cg15203817, cg08039142, cg15828828
CACNA1A	0.000244948	0.0127112	0.498493	-0.728894	-2.21533	12	cg03697708, cg07005612, cg26554567, cg12092090, cg17509967, cg03232879
SSH2	0.000134004	0.0086635	0.518848	-0.635892	-2.21388	19	cg19993903, cg21469359, cg10033837, cg04440679, cg23240026, cg24958916, cg09844261, cg08693474, cg27417090
HOXC11	0.000317698	0.0149334	0.498493	-0.691249	-2.21268	14	cg00796424, cg07123069, cg22709192, cg17225923, cg03536474, cg03762366, cg26386624, cg03132556, cg04369416, cg07697238, cg15830509
PCDHAC2	0.000210224	0.0115971	0.518848	-0.607778	-2.21263	21	cg25500080, cg23347718, cg02357321, cg23440413, cg16174029, cg18991549, cg24076884, cg00682007, cg12832313, cg08772837, cg05783854, cg24119225
LOC285548	0.00056573	0.0203498	0.477271	-0.760184	-2.21172	10	cg11773816, cg10936964, cg22738516, cg21495653, cg06849515, cg16220124, cg16292168, cg01945641, cg10461004, cg20318726
ZNF37B	1.19214e-05	0.00226711	0.593325	-0.935597	-2.21132	6	cg17830980, cg07876289, cg08197448, cg14058825, cg02949969, cg17003301
CARS	0.000139959	0.00890069	0.518848	-0.635102	-2.21113	19	cg25174290, cg11849638, cg21875845, cg14935025, cg01104590, cg09911488, cg20324356, cg14312661, cg08895021, cg04433151
DZIP3	8.0304e-05	0.00630355	0.538434	-0.554362	-2.20963	30	cg18452149, cg17810802, cg15763344, cg23274264, cg05772678, cg07413063, cg16906111, cg05888082, cg09720372, cg21972470, cg13977080, cg13901143, cg01457752, cg16279940, cg10130694, cg04779640
FAM149B1	0.000335852	0.0151778	0.498493	-0.69028	-2.20958	14	cg25138168, cg13745964, cg22981519, cg04381006, cg03701779, cg08879241, cg11829033, cg04749667, cg15213114, cg04167018, cg15427656, cg16124546
SNAI2	0.000475554	0.0186955	0.498493	-0.792067	-2.2091	9	cg00116554, cg08812057, cg23277389, cg09881855, cg26055203, cg24783322
SLITRK1	0.000295292	0.0143142	0.498493	-0.568483	-2.20893	27	cg26998274, cg04095724, cg08697689, cg13988851, cg19610077, cg18937395, cg25940241, cg25938646, cg18789918, cg19696317, cg21448057, cg24905385, cg01729717, cg07104706, cg02772430, cg18215217
NEK1	0.000211232	0.0116118	0.518848	-0.619031	-2.20886	20	cg14353962, cg10573181, cg02079106, cg17278115, cg24044084, cg11800613, cg01112923, cg17649408, cg15957291, cg07701716, cg27158490, cg03267502, cg00846720, cg24768778
ZIC4	1.51453e-05	0.00249769	0.593325	-0.535177	-2.2087	38	cg08070771, cg02820514, cg24686610, cg12388007, cg26224785, cg23957311, cg05811594, cg15255896, cg13278496, cg03900143, cg02387803, cg24620761, cg21639713, cg17003736, cg03881775, cg27606499, cg03355998, cg07850418, cg13015925, cg06369327, cg26791399
KCNC3	0.000370516	0.0161664	0.498493	-0.664692	-2.20837	16	cg04862686, cg00740020, cg19753794, cg15129307, cg00342532, cg07919466, cg13670833, cg03213352, cg02854695, cg13379419, cg13378394
ZNF432	0.000272743	0.013638	0.498493	-0.726452	-2.20791	12	cg14944575, cg07629094, cg02729352, cg11945235, cg13584718, cg11919525, cg25291234, cg22690634
ADM	0.000117618	0.0079199	0.538434	-0.586331	-2.20709	25	cg03780905, cg08259810, cg20741987, cg12831925, cg17108838, cg02181247, cg00189457, cg01085454, cg09639735, cg19315081, cg16198151, cg03548673, cg05149386, cg21039208
C11orf58	0.000214228	0.0116449	0.518848	-0.606251	-2.20707	21	cg05512310, cg20172415, cg20856413, cg10353785, cg08466074, cg09555217, cg25623072, cg20474675, cg22969287, cg13475375, cg25556987, cg03129653, cg20488757
MCEE	0.000840279	0.0252343	0.477271	-0.702941	-2.20689	13	cg20921688, cg18750833, cg03397956, cg04049556, cg10109585, cg20516151, cg15638547, cg19510321, cg15822934, cg17464212, cg21214953, cg08366196
VPS52	7.45836e-05	0.00616532	0.538434	-0.542028	-2.20551	33	cg20140229, cg16052901, cg07362537, cg20557567, cg19926505, cg00879843, cg06352039, cg11615303, cg25515801, cg05216888, cg14266999, cg10301967, cg11275803, cg24664526, cg26283141, cg00058113, cg11222065, cg12086028, cg13012686, cg21096118, cg22783602
INTU	0.000346745	0.0155835	0.498493	-0.688842	-2.20497	14	cg15437651, cg24008263, cg19854376, cg21951594, cg11779273, cg22357337, cg25442239
DTD1	0.000882645	0.0258679	0.477271	-0.702285	-2.20483	13	cg21898246, cg09758623, cg06177053, cg02500267, cg27199827, cg23984997, cg04985652, cg04737319
ATOH1	0.000217461	0.0117877	0.518848	-0.647128	-2.20397	18	cg04796189, cg13511000, cg02640260, cg26124980, cg26745332, cg01612443, cg10460820, cg22604636, cg06100370, cg00335712, cg15076145, cg13316430, cg01357116, cg25367352
INPPL1	0.000283167	0.0139152	0.498493	-0.725041	-2.20362	12	cg10119679, cg16501572, cg01360224, cg12648988, cg18675244, cg19740763, cg14371107
AURKC	0.000910889	0.0261059	0.477271	-0.701637	-2.20279	13	cg22711741, cg25802888, cg14370847, cg08268757, cg26332114, cg19568003, cg25432232, cg19603903, cg15128510
GABPA	5.27001e-05	0.00512118	0.557332	-0.54873	-2.20208	32	cg01957918, cg26562424, cg17331315, cg09651630, cg07795841, cg25670690, cg06164433, cg26131381, cg15842400, cg15707568, cg25797568, cg03497482, cg00520622, cg25085950, cg12457986, cg12545570, cg12301294, cg24327803, cg21890848, cg17612569, cg16896631, cg19891733
RNF215	0.000605429	0.0209873	0.477271	-0.75673	-2.20167	10	cg08786711, cg25964984, cg20112827, cg03868770, cg05497972, cg07074042, cg10529757, cg04183381
SSBP1	0.000165767	0.0103392	0.518848	-0.632328	-2.20147	19	cg06736242, cg09248893, cg08596028, cg00710708, cg14147224, cg00748426
RPUSD2	0.000772759	0.0241287	0.477271	-0.665205	-2.20139	15	cg09167084, cg18988510, cg20139049, cg15454857, cg15825536, cg21874278, cg00066468, cg17356999, cg12754238
TCF7L2	0.000178308	0.0107083	0.518848	-0.661263	-2.20013	17	cg10607059, cg03300340, cg04953732, cg08851840, cg14737332, cg05112824, cg07128799, cg07849302, cg14562081
BAI3	0.000772759	0.0241287	0.477271	-0.664676	-2.19964	15	cg17094144, cg10467432, cg13045310, cg05295494, cg09747829, cg10244047, cg03938432, cg26862527, cg26668430, cg04569381, cg09805943, cg14031178
RFX5	0.000178308	0.0107083	0.518848	-0.661018	-2.19932	17	cg27405014, cg12944506, cg17278771, cg00003202, cg26796396, cg04900486, cg19247181, cg24872444, cg05321339, cg06904938, cg18945601
FOXA1	0.000772759	0.0241287	0.477271	-0.664555	-2.19924	15	cg10724086, cg16581536, cg01892516, cg03026462, cg01824511, cg16527491, cg27242776
GNG5	0.000832777	0.0250477	0.477271	-0.663282	-2.19502	15	cg00357368, cg13469748, cg27037943, cg11341527, cg07706442, cg00020720, cg16261581, cg19764042, cg16384088, cg23054925, cg23441167
NEFL	0.000254661	0.0129731	0.498493	-0.615153	-2.19502	20	cg15930283, cg02360305, cg24032666, cg00197313, cg01023696, cg16080876
C2orf49	0.000684894	0.0223684	0.477271	-0.754352	-2.19475	10	cg02198421, cg17274774, cg03787042, cg19996710, cg22591293, cg17485827, cg01436700
INO80B	0.00103799	0.0284096	0.45506	-0.698989	-2.19448	13	cg11376913, cg19149222, cg07023902, cg17486538, cg26479323, cg03309722, cg27136299
SLC1A3	0.000124495	0.00825664	0.518848	-0.601181	-2.19436	22	cg16610086, cg05035351, cg11283983, cg03554170, cg21612334, cg11116429, cg25316853, cg12962599, cg16963869, cg07482508, cg06960901, cg26227298, cg25010361
PRKDC	0.000383124	0.0163142	0.498493	-0.685212	-2.19336	14	cg03429865, cg11220133, cg07417733, cg00318618, cg10477468
C2orf50	0.000599952	0.0209873	0.477271	-0.733058	-2.19267	11	cg12453288, cg27471536, cg27641709, cg03251967, cg05517905, cg10334385
CETN3	0.000383124	0.0163142	0.498493	-0.684993	-2.19266	14	cg06187252, cg11589797, cg14993293, cg18179305, cg05233390, cg02407224, cg20713816, cg08935243, cg15640707
MPV17L2	0.000606809	0.0209873	0.477271	-0.732947	-2.19234	11	cg12592302, cg07730149, cg26736273, cg25307434, cg19014302, cg06889484
PID1	0.000606809	0.0209873	0.477271	-0.732841	-2.19202	11	cg26777793, cg06064269, cg26112014, cg11646986, cg16002100, cg21949333
SAR1B	0.00105211	0.0286574	0.45506	-0.698191	-2.19197	13	cg18318704, cg16832091, cg18260973, cg26293310, cg10997251, cg15385386, cg19309787
CCDC123	0.000390422	0.0165299	0.498493	-0.684644	-2.19154	14	cg15196793, cg25368113, cg23933793, cg18037230, cg07727872, cg16174234, cg24028120, cg09328527
CYR61	0.000847782	0.0252635	0.477271	-0.662223	-2.19152	15	cg20097073, cg04453065, cg07165167, cg07877243, cg13871826, cg06805280, cg12278705, cg05395648
MEGF8	0.000397719	0.0166793	0.498493	-0.68452	-2.19114	14	cg01775098, cg26548653, cg08038761, cg10054313, cg24449014, cg10381076, cg09190341, cg08371772
CLVS2	0.00013088	0.00851811	0.518848	-0.600277	-2.19106	22	cg08194879, cg05757803, cg01141812, cg20134787, cg18210226, cg10182317, cg16661755, cg07047482, cg13148130, cg18366209, cg19404453, cg21727532, cg24572358, cg01707818, cg09946253
ZNF471	0.00106623	0.0288981	0.45506	-0.697893	-2.19104	13	cg19358877, cg11539780, cg00674365, cg12844912, cg14277392, cg19811761, cg14042851, cg24713204
IKZF2	0.000191575	0.0111618	0.518848	-0.629201	-2.19059	19	cg01774108, cg17384625, cg26151940, cg20820997, cg18986489, cg23503584, cg00591406, cg07610406, cg11217840, cg02239891
AIM1	0.00108035	0.029159	0.45506	-0.697713	-2.19047	13	cg18405900, cg25944720, cg12448860, cg06025938, cg23052020
MYOF	0.000620522	0.0212221	0.477271	-0.732239	-2.19022	11	cg05176433, cg01849212, cg18514344, cg14449963, cg21364560, cg13734710, cg21453238
SMYD4	0.00108035	0.029159	0.45506	-0.697464	-2.18969	13	cg09670182, cg09901733, cg26843862, cg13946118, cg17057072, cg21920539, cg22295628, cg26733142, cg02467073
CCDC180	0.000777984	0.0241766	0.477271	-0.752289	-2.18875	10	cg17560895, cg24160278, cg26528000, cg07774938, cg27594116, cg02890052, cg17794750, cg19118791
FEZF1	0.000348908	0.0156412	0.498493	-0.587191	-2.18871	23	cg07798380, cg14627743, cg05009601, cg10485664, cg24934063, cg09511119, cg04931708, cg21332334, cg25124241, cg00419963, cg20222926, cg25045526, cg17704189, cg24308389, cg07604651, cg20974724
FAM179B	0.000242257	0.012691	0.518848	-0.601147	-2.18849	21	cg21096966, cg00660989, cg05194618, cg01340952, cg02082203, cg08961438, cg23695485, cg07783772, cg25000079, cg23285774, cg02034974
CP110	0.000321385	0.0149337	0.498493	-0.719881	-2.18794	12	cg00747859, cg09830552, cg09146325, cg01705566, cg06784594, cg27265032
PI4K2B	0.000647948	0.0217773	0.477271	-0.73134	-2.18753	11	cg09290748, cg25018951, cg05965402, cg12714758, cg01722343, cg19419801, cg12931625, cg23293878, cg27140938
POLR2F	0.000195545	0.0111882	0.518848	-0.628243	-2.18725	19	cg00802408, cg20982583, cg25314532, cg20570841, cg25786406, cg16719350, cg25051108, cg12251714, cg25296646, cg22250642, cg07979962
HOXD9	0.000200223	0.0113928	0.518848	-0.657292	-2.18692	17	cg09968620, cg02885007, cg22541735, cg14991487, cg04739647, cg05167251, cg14410016, cg09578028, cg22674699, cg06953874
PRPS2	0.000321385	0.0149337	0.498493	-0.719539	-2.1869	12	cg26059639, cg09978401, cg01669374, cg27325673, cg07874284, cg26190455
C10orf41	0.000468882	0.0185456	0.498493	-0.658223	-2.18687	16	cg04283751, cg01431972, cg10721116, cg17361803, cg15437133, cg18510056, cg26740856, cg26717995, cg17211261, cg18055125
BRD2	6.885e-08	6.69911e-05	0.704976	-0.430602	-2.18633	102	cg21003870, cg25566552, cg22798756, cg08948338, cg13465831, cg03532223, cg10792864, cg26246658, cg10919398, cg06361403, cg02653117, cg02888917, cg22131799, cg08228422, cg10211788, cg04138346, cg27501451, cg13418419, cg09209606, cg04798369, cg21081704, cg01909833, cg13224077, cg01641778, cg21755381, cg08275608, cg17451945, cg07820696, cg21580173, cg17674495, cg21174644, cg01540301, cg00956573, cg0…
FADS2	0.000133008	0.00862776	0.518848	-0.598867	-2.18591	22	cg02563962, cg11985562, cg15454066, cg21409469, cg20896974, cg25303599, cg24636220, cg09610223, cg11229063, cg09782344, cg14562930, cg23760165, cg07005513, cg05816884
GNAL	1.22247e-05	0.00226711	0.593325	-0.50953	-2.18558	45	cg03561131, cg04906950, cg02931159, cg25958283, cg12585806, cg11951019, cg27362302, cg11920122, cg03417884, cg09331011, cg04745526, cg06595595, cg25341196, cg01958356, cg10068300, cg20477644, cg15616946, cg14612428, cg12869154, cg15653282, cg12327405, cg05868911
PCDHA8	0.000892796	0.0258909	0.477271	-0.659966	-2.18405	15	cg24339092, cg24769628, cg22642909, cg17480980, cg13309828, cg06951122, cg14579239
CDC2	0.000892796	0.0258909	0.477271	-0.659861	-2.1837	15	cg13954297, cg02401235, cg06793798, cg27457323, cg15172601, cg13554667, cg25793692, cg04271103, cg17327186, cg19147990, cg25228510, cg20353480, cg01394540, cg14922279
FOXA2	0.000249381	0.0127776	0.498493	-0.641168	-2.18368	18	cg09861917, cg15218073, cg12356107, cg08225889, cg07572341, cg25218716, cg08926325, cg24324985, cg11798857, cg10003443, cg06697267, cg00331096, cg14497670
MORF4L2	0.000262278	0.0131884	0.498493	-0.599769	-2.18347	21	cg09990582, cg01290348, cg08262933, cg07039524, cg16950696, cg05184076, cg06359500, cg09598844, cg02720188, cg11641061, cg14182855
SYF2	0.000844477	0.0252635	0.477271	-0.750381	-2.18319	10	cg16245510, cg17462478, cg11518020, cg22856539, cg17651255, cg25876608, cg16663955, cg21807865
BMP7	0.000476763	0.0187052	0.498493	-0.6571	-2.18314	16	cg12518442, cg18759209, cg15069906, cg14839404, cg26516759, cg00309582, cg03573446, cg11670519, cg10941747, cg20292547, cg02942008, cg20866569, cg22047703
NMI	0.00113684	0.0302248	0.45506	-0.694828	-2.18141	13	cg24328079, cg17375798, cg22303846, cg22664064, cg08193100, cg03760265, cg14046365, cg15747933, cg09917274
EBF1	0.000492586	0.0191332	0.477271	-0.681452	-2.18132	14	cg04217450, cg11503011, cg05530568, cg16317459, cg26664797, cg07607126
COL4A6	0.000952814	0.0270683	0.477271	-0.659054	-2.18103	15	cg09792758, cg04793532, cg21064229, cg23689357, cg21705513, cg13113011, cg00815013, cg02937357, cg21051522
FAM155A	0.000201501	0.0113996	0.518848	-0.626311	-2.18053	19	cg03141482, cg14119999, cg04607400, cg24567424, cg19839798, cg05383490, cg10245910, cg05905988, cg07034928, cg06833978, cg22302985, cg13398192, cg25985659
SLIT1	0.000492586	0.0191332	0.477271	-0.680987	-2.17983	14	cg07844694, cg18795469, cg27192088, cg02741216, cg16437009, cg26164234, cg23700044, cg09276368
ZNF687	0.000982824	0.0276525	0.45506	-0.658669	-2.17976	15	cg07987842, cg02388783, cg02326858, cg07309082, cg15691841, cg03265190, cg17170458, cg10633176, cg01435515, cg02290168, cg08927489, cg00587595
SKIV2L2	0.000325728	0.014985	0.498493	-0.610798	-2.17948	20	cg09129895, cg08591579, cg07589143, cg00798886, cg22127314, cg24188111, cg04075035
NEUROG3	0.000205491	0.011458	0.518848	-0.625979	-2.17937	19	cg02262662, cg03425110, cg07647353, cg25721037, cg10001282, cg20958898
SS18	0.000352655	0.0157025	0.498493	-0.717002	-2.17918	12	cg00625131, cg05146683, cg19948974, cg13022174, cg17187922
CAND1	0.00116509	0.0307216	0.45506	-0.694099	-2.17912	13	cg15993795, cg04956790, cg06162746, cg02063925, cg26038859, cg16321806, cg18750937, cg17524854, cg16896371, cg06515732
SKA3	0.000764847	0.0241287	0.477271	-0.728518	-2.17909	11	cg13537310, cg23247274, cg06051212, cg25549747
CIDEA	0.000273321	0.013638	0.498493	-0.639635	-2.17845	18	cg12072560, cg05700339, cg20950011, cg03245632, cg21376774, cg16727201, cg14976646, cg07204280, cg00851770, cg19883905, cg18309817
HNRPA1L-2	0.000508283	0.019297	0.477271	-0.655628	-2.17825	16	cg11338003, cg20545544, cg09060496, cg03689456, cg15708001, cg02049941, cg12263485, cg24505978, cg06399839, cg14017196, cg05754589, cg09158487
TBX3	0.000508283	0.019297	0.477271	-0.655081	-2.17644	16	cg17161834, cg22797735, cg19612173, cg18575770, cg08330778, cg12530050, cg21913681, cg02121943, cg10530281
MAML3	0.00117921	0.0309264	0.45506	-0.693197	-2.17629	13	cg21917214, cg04128257, cg20908224, cg22902537, cg24389389, cg02953590, cg21313298, cg12975464, cg02346313
COPB1	0.00104284	0.0284928	0.45506	-0.657609	-2.17625	15	cg01051381, cg00704909, cg16535062, cg00248638, cg03862781, cg14215748, cg12613956, cg02869547, cg08969450
FAM117A	0.000366621	0.0160591	0.498493	-0.716002	-2.17614	12	cg26920587, cg00749852, cg05386508, cg03856492, cg23445416, cg01069707, cg04077077, cg11275626
GPR158	0.000325728	0.014985	0.498493	-0.60965	-2.17538	20	cg27408540, cg16541931, cg24439256, cg13206721, cg19044256, cg09137328, cg23944251, cg25124276, cg07206208, cg14315190, cg25531497
MTHFD2L	0.00117921	0.0309264	0.45506	-0.692742	-2.17487	13	cg04340772, cg17682704, cg05719252, cg11299459, cg23412033, cg24054191
BNC2	0.000784422	0.0242299	0.477271	-0.779712	-2.17464	9	cg04731710, cg08684546, cg21737173, cg18956029, cg05674150, cg06519278
STC2	0.000516164	0.0194285	0.477271	-0.654171	-2.17341	16	cg23746525, cg02135395, cg01685160, cg22834998, cg18335607, cg11457817, cg17802144, cg19673350, cg16600829, cg19586881
RPIA	0.000514478	0.0194026	0.477271	-0.678886	-2.17311	14	cg02988254, cg02518027, cg04742778, cg06529439, cg26249331, cg12750378, cg06358566, cg22825116
TMEM87B	0.000373604	0.0161668	0.498493	-0.714939	-2.17291	12	cg02414648, cg16327883, cg23072981, cg20063462, cg04439376, cg24343273
ELL3	0.000301251	0.0144905	0.498493	-0.637805	-2.17222	18	cg03835332, cg00396687, cg03237412, cg23279948, cg22715760, cg10144958, cg07232475, cg26024852, cg14432968, cg15199800, cg16915619, cg16325280, cg08848316, cg09836324, cg23332699, cg23790767
EMX1	0.000373604	0.0161668	0.498493	-0.714576	-2.17181	12	cg23851476, cg18704110, cg16314401, cg05707704, cg14848284, cg17090593, cg21433086, cg21351994, cg26704870, cg14940308, cg26898166
C11orf17	0.000792408	0.0242639	0.477271	-0.725923	-2.17132	11	cg05969296, cg23733744, cg09997546, cg21944027, cg05955334, cg21881798
SIX4	0.000529073	0.0197995	0.477271	-0.678276	-2.17116	14	cg22114053, cg03059018, cg06726207, cg26746010, cg16491506, cg11059617, cg20283449, cg14985973
DSC3	0.00105785	0.028751	0.45506	-0.656045	-2.17108	15	cg14534277, cg03017520, cg16492377, cg15439862, cg27648075, cg11722699, cg26861703, cg06263193
ATP6AP2	0.000850338	0.0252635	0.477271	-0.778136	-2.17024	9	cg18105467, cg18679504, cg00902308, cg11014998, cg10347293, cg19200045, cg07381502
PIBF1	0.000233421	0.0124449	0.518848	-0.623202	-2.1697	19	cg00949022, cg26597500, cg06116962, cg02162950, cg24666196, cg00509309, cg05004337, cg08910551, cg19929646, cg04393002, cg14004527
LOC441046	0.000863521	0.0255165	0.477271	-0.777901	-2.16959	9	cg06123783, cg18925923, cg06593050, cg17277949, cg13487949
DIS3	0.000262278	0.0131884	0.498493	-0.652055	-2.1695	17	cg00949022, cg26597500, cg06116962, cg02162950, cg24666196, cg00509309, cg05004337, cg08910551, cg19929646, cg04393002, cg14004527
THAP6	0.000262278	0.0131884	0.498493	-0.651959	-2.16918	17	cg19115630, cg08853494, cg12986955, cg06906395, cg12093136, cg27414571, cg18642534, cg16542283, cg10737625, cg19283470, cg03931444
SART3	0.000334353	0.0151778	0.498493	-0.595328	-2.1673	21	cg24903225, cg13240898, cg13381718, cg14419151, cg13470919, cg21167558, cg06530240, cg19162598, cg14690343, cg01972961, cg23951927, cg17319365, cg03827423
TBC1D30	0.000167015	0.0103838	0.518848	-0.855369	-2.16675	7	cg13039115, cg26667356, cg11493126, cg05344021, cg10983146
LEPRE1	0.000408519	0.0168071	0.498493	-0.712775	-2.16634	12	cg01724006, cg06802655, cg21881116, cg19044674, cg00451039, cg26337430, cg09348084, cg27657283
PCDH18	0.000408519	0.0168071	0.498493	-0.712671	-2.16602	12	cg19855285, cg06787716, cg24349132, cg27582625, cg27488530, cg12033966, cg04636538, cg15729945
ROBO1	2.59491e-05	0.00334586	0.57561	-0.518421	-2.16569	40	cg07997035, cg07467520, cg25279453, cg10929784, cg07287167, cg13141515, cg24257740, cg27221334, cg26925415, cg22457527, cg21585126, cg18703601, cg15709235, cg01239827, cg08233594, cg11630696, cg22134588, cg19823985, cg21743712
CCND1	0.000186867	0.0109531	0.518848	-0.537834	-2.16569	31	cg24419164, cg03364015, cg10539418, cg15233880, cg16969182, cg23753457, cg03735308, cg25395653, cg08170622, cg19209049, cg15954335, cg02694676, cg21742931, cg26399164, cg07149785, cg24020398, cg15330584, cg11190277, cg13720316, cg24203315, cg13271751
USO1	0.000558263	0.0203061	0.477271	-0.676437	-2.16527	14	cg02482946, cg13341135, cg03380207, cg27162881, cg07207599, cg26943399
MLLT10	0.00127806	0.032364	0.45506	-0.689621	-2.16507	13	cg03524461, cg26877631, cg23344688, cg00879184, cg27470303
ROGDI	0.00081997	0.0247819	0.477271	-0.72382	-2.16503	11	cg13721165, cg24928184, cg23279544, cg01369341, cg13537787, cg00867273, cg10382060
IFT20	0.000241401	0.012691	0.518848	-0.621736	-2.1646	19	cg26663469, cg10112559, cg06312003, cg05248886, cg18712119, cg12547038, cg16326696
PPRC1	0.00116288	0.0307051	0.45506	-0.654061	-2.16451	15	cg20549080, cg06583105, cg19569081, cg23639922, cg10477754, cg00088042, cg08854825, cg19219661, cg27230711, cg07310536, cg00369716
GNA15	0.00104396	0.0284928	0.45506	-0.743897	-2.16433	10	cg07865607, cg03188495, cg10022788, cg19783761, cg05161016, cg26924967
FAM194A	0.000178839	0.0107083	0.518848	-0.854062	-2.16344	7	cg21422424, cg05889842, cg20922251, cg11593791
KDM1B	0.000847531	0.0252635	0.477271	-0.72317	-2.16309	11	cg18243005, cg22406543, cg00102920, cg15124342, cg07465480, cg24342628
SVEP1	0.00132043	0.0328168	0.45506	-0.688785	-2.16244	13	cg07477928, cg12647560, cg15310270, cg00505361, cg00793655, cg08699164, cg13632816, cg13606569
RPS29	0.000847531	0.0252635	0.477271	-0.722903	-2.16229	11	cg10164705, cg04262419, cg00883854, cg08625335
SOX8	0.00132043	0.0328168	0.45506	-0.688657	-2.16204	13	cg05031521, cg11274843, cg05520409, cg06777194, cg09854626, cg24457008, cg08965276, cg02925162, cg09635053, cg02049499
NAT9	0.000282299	0.0139077	0.498493	-0.649664	-2.16154	17	cg12575325, cg18092021, cg08006076, cg05891497, cg09224958, cg00032227, cg07204069, cg17202948, cg15083255, cg25054828, cg23482840
ROCK1	0.000282299	0.0139077	0.498493	-0.649274	-2.16025	17	cg07557796, cg25956256, cg23360087, cg25615024, cg01195198, cg05175333, cg23882285, cg06066247, cg22792432
TBL2	0.000587452	0.0207601	0.477271	-0.674735	-2.15982	14	cg27068399, cg13434062, cg02290509, cg20004424, cg15781561
THAP10	0.000373107	0.0161668	0.498493	-0.605156	-2.15935	20	cg24740226, cg26350878, cg11993621, cg24190127, cg00366471, cg00347862, cg01710857, cg15692777, cg05764376, cg16034881, cg10285743, cg15089487, cg01323862
SNX8	0.00146179	0.0349036	0.45506	-0.687331	-2.15788	13	cg19548172, cg08224975, cg13140565, cg21030419, cg00363841, cg22650065, cg16375198
ADAM10	0.00146179	0.0349036	0.45506	-0.687288	-2.15774	13	cg15770593, cg08898775, cg20288868, cg21683678, cg20532450, cg23535753, cg15345430
KCNK9	0.0004574	0.0182772	0.498493	-0.709662	-2.15688	12	cg02505749, cg04344565, cg12175729, cg16595365, cg14930075, cg01532168, cg25932807, cg01717150, cg17834752, cg21415530
FZD2	0.000306324	0.0145392	0.498493	-0.64804	-2.15614	17	cg07929961, cg07009792, cg06257136, cg24917527, cg04981477, cg21571937, cg07596482, cg03446079
KLHL28	0.000175569	0.0107083	0.518848	-0.590416	-2.15507	22	cg21096966, cg00660989, cg05194618, cg01340952, cg02082203, cg08961438, cg23695485, cg07783772, cg25000079, cg23285774, cg02034974
PRKAA1	0.000609345	0.0209873	0.477271	-0.673244	-2.15505	14	cg26650703, cg01883943, cg05874655, cg22327282
NKAIN4	0.001114	0.0297782	0.45506	-0.772523	-2.15459	9	cg14877226, cg15974634, cg05768532, cg13459349, cg01911708, cg13657510
TAF1D	0.000175569	0.0107083	0.518848	-0.590213	-2.15433	22	cg27329005, cg22427773, cg08494300, cg01988480, cg06996869, cg21339478, cg04209631, cg19185133, cg21866596, cg17021566, cg21056715, cg03761846, cg24881229
ATP5H	0.000587086	0.0207601	0.477271	-0.648271	-2.15381	16	cg11305394, cg13920801, cg03021192, cg04547425, cg24268758, cg06995624, cg08515779, cg18049142, cg15864779, cg15221589, cg08278246
SLC16A13	0.00151856	0.035433	0.45506	-0.685848	-2.15322	13	cg09543792, cg03569506, cg24173049, cg01107801, cg22884899, cg24535234, cg20980615
PPP1R15B	0.000277311	0.0137665	0.498493	-0.618382	-2.15292	19	cg05702633, cg22449766, cg17597419, cg13150040, cg20148187, cg26906418, cg16072030, cg00952134, cg16175258, cg10057631
PTPRM	0.00120354	0.0313513	0.45506	-0.739514	-2.15158	10	cg25279586, cg07075930, cg22141456, cg22828723, cg11814464, cg19029422, cg05870479
RBM28	0.000888873	0.0258909	0.477271	-0.719292	-2.15149	11	cg11071534, cg24484268, cg26739223, cg14202601, cg26924747, cg10000639, cg11041966, cg08635249
BBS12	0.0004574	0.0182772	0.498493	-0.707811	-2.15125	12	cg09398845, cg04556854, cg26561998, cg10495464, cg05619320, cg08384502, cg23449789, cg17338352
C21orf88	8.66025e-05	0.00655753	0.538434	-0.910108	-2.15108	6	cg08448665, cg17900854, cg00850083, cg03701992, cg23057648
GNL3	0.000653129	0.0218164	0.477271	-0.671939	-2.15087	14	cg10828744, cg09817993, cg15053483, cg20166585, cg14461492, cg21899138, cg11041457, cg03822350, cg13174197
ZMPSTE24	0.000377062	0.0162697	0.498493	-0.631387	-2.15037	18	cg08645375, cg03057621, cg13502356, cg18179124, cg25275331, cg16044925, cg23710710, cg26266862, cg13673659, cg13683282, cg12155376, cg19657082
S100A1	0.000247013	0.0127776	0.498493	-0.569039	-2.1501	26	cg27469660, cg11343894, cg11915664, cg02331910, cg13946767, cg04077668, cg02873163, cg11596404, cg17776284, cg06562291, cg00012362, cg19335413, cg01347250, cg07898899
NAA10	0.000902654	0.0259835	0.477271	-0.718793	-2.15	11	cg09771319, cg02232536, cg01501311, cg04968233, cg00072288, cg12727431, cg22749239
SNORD43	0.000602846	0.0209873	0.477271	-0.646899	-2.14925	16	cg07236424, cg04419707, cg00320749, cg23880794, cg27511021, cg07628658, cg20795428, cg15010396, cg07236476
WDR77	0.000464383	0.0184427	0.498493	-0.707082	-2.14903	12	cg14092851, cg26750218, cg07151560, cg01724336, cg20276503, cg09110926, cg18367110
ECHDC3	0.00123014	0.0317486	0.45506	-0.738534	-2.14873	10	cg00673251, cg07446677, cg01619369, cg24428042, cg14032732, cg23960723, cg10543363, cg14743702
KMO	0.000220222	0.0119042	0.518848	-0.848211	-2.14862	7	cg27277403, cg20218124, cg11150901, cg10186283, cg19259783
PCDHGA11	0.000334353	0.0151778	0.498493	-0.645621	-2.14809	17	cg17857974, cg05870739, cg26647197, cg18118262, cg07179872
NOL4	6.64049e-05	0.0058209	0.538434	-0.517759	-2.1479	37	cg10978194, cg22346702, cg20388206, cg00443596, cg23419050, cg17160317, cg11791210, cg03045425, cg08195448, cg00884606, cg18114671, cg00015791, cg16979355, cg25706530, cg01656421, cg12911428, cg12084076, cg24248713, cg22095604
TTI2	0.000402559	0.0167382	0.498493	-0.811654	-2.14707	8	cg26379152, cg05580096, cg21370317, cg26712424
CCDC61	0.000957777	0.0271696	0.477271	-0.717515	-2.14618	11	cg01485046, cg26523841, cg19636492, cg21903660, cg24836072, cg01389504, cg22342564, cg10648376, cg01031177
DHRS1	0.000464226	0.0184427	0.498493	-0.601248	-2.1454	20	cg02145101, cg24129873, cg09975804, cg14911202, cg26520897, cg09546345, cg05279284, cg10352719, cg22790142, cg12431977, cg18424115, cg10027270
PAN3	0.00160371	0.0361624	0.45506	-0.683299	-2.14522	13	cg12073754, cg06477715, cg25354849, cg17380039
SHISA7	0.00128333	0.032364	0.45506	-0.737057	-2.14443	10	cg08918013, cg22095599, cg01641455, cg10638599, cg12137286, cg03124532, cg15330921
C4orf22	0.00129857	0.032481	0.45506	-0.768738	-2.14403	9	cg25994584, cg12134900, cg19995828, cg13843773, cg07668908, cg12416561
RGAG4	0.00134294	0.0329969	0.45506	-0.647754	-2.14364	15	cg03679269, cg04210573, cg00374346, cg24569746, cg19885926, cg10482495, cg09820553, cg20347665, cg12905598, cg06796204, cg01997410
SNORA76	0.00134294	0.0329969	0.45506	-0.647648	-2.14329	15	cg24139916, cg10297568, cg20969675, cg00614969, cg00380338, cg26529556, cg12977686, cg10245865, cg20850195, cg12274314
MIA3	0.000999119	0.0277755	0.45506	-0.716441	-2.14296	11	cg01065413, cg15993834, cg13357903
ZNF189	0.000711509	0.0230382	0.477271	-0.669074	-2.1417	14	cg14383545, cg21054287, cg21746459, cg13474639, cg02512375, cg00305046, cg05231631, cg07472329, cg17687519, cg11709875, cg08871467
CDGAP	0.00130993	0.032681	0.45506	-0.735925	-2.14114	10	cg12580583, cg09081994, cg25640619, cg20785333, cg12764921, cg20677142
ZFHX4	7.14642e-05	0.00607807	0.538434	-0.515922	-2.14028	37	cg00931558, cg18026227, cg08322240, cg16586418, cg23134869, cg08322102, cg07585876, cg21233847, cg08335273, cg01419567, cg11174836, cg11731507, cg25662926, cg07176589, cg00594560
ABCB4	0.00132323	0.0328218	0.45506	-0.735606	-2.14021	10	cg19041648, cg13338827, cg04996195, cg25823085, cg04438814, cg14785615
EXOSC7	0.00133812	0.0329618	0.45506	-0.767291	-2.14	9	cg13964906, cg18101118, cg21307697, cg18324596
CKS1B	0.000506282	0.019297	0.477271	-0.703675	-2.13868	12	cg15556748, cg08733086, cg04805100, cg00915289, cg20448212, cg02576073
VMAC	0.000618606	0.0211938	0.477271	-0.643684	-2.13857	16	cg02434381, cg14789178, cg18891387, cg16868177, cg19530883, cg04582374, cg14508733, cg22854549, cg25730138, cg24321432, cg26378629
FAM126B	0.000322309	0.0149337	0.498493	-0.571561	-2.1381	24	cg03075561, cg11907102, cg18143488, cg11937346, cg17079352, cg04865026, cg07329149, cg06725479, cg13235654, cg02198983, cg04514983, cg02994018
ADAMTS8	0.000378399	0.0162704	0.498493	-0.642333	-2.13715	17	cg03653835, cg01033938, cg26326033, cg06944693, cg09134593, cg00566635, cg04268950, cg14119558, cg01260219, cg13464448, cg24205332, cg12270485
TSPAN13	0.00141761	0.0342692	0.45506	-0.766079	-2.13662	9	cg12567315, cg21782247, cg24756756, cg19498319, cg18818321, cg09895586
LRP2	0.00113693	0.0302248	0.45506	-0.714163	-2.13615	11	cg16691888, cg13436799, cg10131219, cg03019033, cg16585827, cg02714065, cg13647055, cg25554917, cg01329010, cg24606651
FLJ26850	0.000484971	0.0189509	0.498493	-0.807514	-2.13612	8	cg07141565, cg21305096, cg26353468, cg27397787, cg07655045, cg26257814
SMOC2	0.00049765	0.0192437	0.477271	-0.807127	-2.1351	8	cg09214254, cg05897091, cg20755651, cg01568319, cg02540477
BSDC1	0.00049765	0.0192437	0.477271	-0.80705	-2.13489	8	cg05221875, cg02822040, cg04885470, cg06713267, cg12379989
TSPAN3	0.00149298	0.0352163	0.45506	-0.64507	-2.13475	15	cg25409785, cg14776265, cg19373938, cg10155312, cg02200402, cg23235362, cg27105813, cg12860098
ONECUT2	0.000755366	0.0240187	0.477271	-0.66666	-2.13397	14	cg20324206, cg14345128, cg23757446, cg08768621, cg02250594, cg09879099, cg25547580, cg02455094, cg25800170
GSTM5	1.10531e-09	2.68868e-06	0.788187	-0.993292	-2.13388	5	cg25210835, cg24467349, cg14377951, cg20803293, cg12858902
ILF2	0.00168886	0.0370938	0.45506	-0.679523	-2.13336	13	cg12530481, cg23654844, cg22861691, cg16101101, cg13209085, cg18623118, cg09929564, cg26037239, cg18227129, cg09366641
RNF213	0.00117827	0.0309264	0.45506	-0.713178	-2.1332	11	cg21516384, cg06751007, cg01147067, cg06665890, cg22357164, cg06380459, cg22749810, cg22935501, cg09907395
SC5DL	0.00119205	0.0311791	0.45506	-0.712983	-2.13262	11	cg26829451, cg13421924, cg18247126, cg13982661, cg08243963, cg12753450, cg26735824, cg10316593
TEX261	0.000770033	0.0241287	0.477271	-0.66617	-2.1324	14	cg01708812, cg24236559, cg12539128, cg07410044, cg07040133, cg05409038, cg23731591, cg07603744, cg13320002
KIAA1239	0.00123339	0.0317905	0.45506	-0.7126	-2.13147	11	cg02564761, cg25205699, cg11856542, cg23189276, cg09295573, cg06651311, cg06805348
SFRP2	8.78343e-05	0.00657406	0.538434	-0.519459	-2.13097	35	cg04965141, cg23910835, cg10942078, cg23121156, cg05164933, cg23292160, cg10790791, cg09788843, cg03202804, cg24968721, cg00082664, cg05874561
COL4A5	0.000770033	0.0241287	0.477271	-0.665704	-2.13091	14	cg09792758, cg04793532, cg21064229, cg23689357, cg21705513, cg13113011, cg00815013, cg02937357, cg21051522
HADHB	0.000250168	0.0127776	0.498493	-0.566089	-2.13089	25	cg08235500, cg00747065, cg26119090, cg01355520, cg13178077, cg01655552, cg00966762, cg03330302, cg21903765, cg07203352, cg26949087, cg20517616, cg19386576, cg17695351, cg08067268, cg10857710
EIF1AD	0.000328364	0.0150707	0.498493	-0.539086	-2.13075	28	cg04187187, cg15657666, cg07147218, cg13143994, cg19121987, cg03857673, cg02202077, cg02427764, cg04401197, cg27445169, cg04154397, cg13069411, cg09783858, cg04197135, cg17985854
ZNF460	0.00171724	0.037338	0.45506	-0.678493	-2.13013	13	cg11321674, cg04203113, cg08008199, cg26633994, cg12495725, cg17099677, cg08849938, cg02978959
RNASEN	0.000453108	0.0182173	0.498493	-0.625335	-2.12975	18	cg05611617, cg01221836, cg00368022, cg00307266, cg18610977, cg21605845, cg11271457, cg16539675, cg12193657
SPATA1	0.000503002	0.019297	0.477271	-0.585008	-2.12973	21	cg23255950, cg00357368, cg13469748, cg27037943, cg11341527, cg24995240, cg03757594, cg07706442, cg00020720, cg16261581, cg19764042, cg16384088, cg23054925, cg23441167
SLU7	0.00127473	0.032342	0.45506	-0.711989	-2.12965	11	cg15333689, cg00583654, cg25596173, cg22712893, cg18516985
LOC153684	0.00143001	0.034398	0.45506	-0.731928	-2.12951	10	cg17269733, cg00717648, cg09741070, cg05000518, cg25564121, cg14681629, cg00257271
SPOCK1	0.00143001	0.034398	0.45506	-0.731832	-2.12923	10	cg14650610, cg18263365, cg09054633, cg24847829, cg20897685, cg24780234, cg03554765, cg12832649, cg18603028
SP8	0.00171724	0.037338	0.45506	-0.6782	-2.12921	13	cg16448102, cg06112708, cg16544956, cg27191852, cg14141380, cg24881205, cg21438382, cg01582980
DCDC1	0.000353428	0.0157025	0.498493	-0.569152	-2.12909	24	cg26224996, cg01711021, cg21433330, cg00892312, cg24811929, cg22333733, cg16322655, cg25572812, cg17730486, cg13669089, cg12882726, cg16048161
VIM	0.000250168	0.0127776	0.498493	-0.565606	-2.12908	25	cg18876173, cg06460869, cg27313572, cg20198108, cg07831453, cg26306372, cg16744595, cg00146951, cg18664095, cg19111999, cg11973177, cg05151811, cg08918274, cg21745992, cg01044166, cg02236650
INTS8	0.000541197	0.0201195	0.477271	-0.70025	-2.12827	12	cg19995094, cg00375031, cg13924748, cg06702534, cg04441697, cg10867947, cg00485702, cg10472151
C5orf34	0.000402424	0.0167382	0.498493	-0.639586	-2.12801	17	cg21545926, cg06610098, cg14116465, cg21990494, cg24043192, cg07939922, cg21367516, cg22719833, cg09156140, cg25392187, cg12998533
SALL1	4.79919e-05	0.00481404	0.557332	-0.509044	-2.12619	39	cg11035433, cg00582524, cg04550052, cg22674717, cg05404010, cg09016242, cg00177451, cg05213609, cg02288754, cg04844564, cg08526074, cg04698114, cg06653699, cg02417084, cg27423760, cg06274671, cg13755795, cg01500945, cg13692711
SPRY1	0.000322291	0.0149337	0.498493	-0.562481	-2.12532	26	cg19123095, cg00882832, cg01954742, cg22421084, cg06974483, cg06233211, cg27362222, cg26036478, cg23345580, cg27191207, cg05570735, cg22637759, cg18435820, cg27096981, cg22423979
ASXL3	0.00135742	0.0332687	0.45506	-0.710029	-2.12379	11	cg08689015, cg20034091, cg06908534, cg12361352, cg20329085, cg09774572, cg09963640, cg27109877, cg24880056
PARD3	0.00155009	0.0357669	0.45506	-0.761364	-2.12347	9	cg24138862, cg27500214, cg07452799
TMEM109	0.000820262	0.0247819	0.477271	-0.569515	-2.12282	23	cg04723601, cg17229496, cg05160409, cg07346676, cg14898246, cg09954549, cg14256568, cg02442820, cg20334699, cg27119919, cg15431741
PPP1R3G	0.000576113	0.0206501	0.477271	-0.698439	-2.12277	12	cg12150111, cg05098876, cg07005356, cg24920126, cg21789044, cg11574745, cg18252067, cg09138115
PCDHGA3	0.00158331	0.036051	0.45506	-0.641072	-2.12152	15	cg11236452, cg01301252, cg14468658, cg15314696, cg01418385, cg17588578, cg02146079, cg18839637, cg18839750, cg24066843, cg01561869
DUSP12	0.000611028	0.0210082	0.477271	-0.697987	-2.12139	12	cg01028447, cg19969587, cg23779106, cg12018765, cg06514368, cg11132352, cg16924622, cg16414945
DNAJC28	0.000543242	0.0201195	0.477271	-0.582537	-2.12074	21	cg13319664, cg24278865, cg08682352, cg09563231, cg21131315, cg23464435, cg13066630, cg05083393
MGC2752	0.000323798	0.014967	0.498493	-0.837026	-2.12028	7	cg15539395, cg07786254, cg22010065, cg26954695, cg13923040
ZFP42	0.000438619	0.0177292	0.498493	-0.637185	-2.12002	17	cg09357276, cg22283925, cg10242602, cg17214381, cg14189571, cg12704432, cg11638298, cg24519147, cg06274159, cg24896649, cg18034737
SLC25A23	0.00160309	0.0361624	0.45506	-0.759839	-2.11921	9	cg26192857, cg08782213, cg10131887, cg25468529, cg21457031, cg03214277, cg15187882
C19orf40	0.000768331	0.0241287	0.477271	-0.63777	-2.11892	16	cg15196793, cg25368113, cg23933793, cg18037230, cg07727872, cg16174234, cg11992021, cg24028120, cg09328527
NCAM1	0.00185916	0.0389024	0.45506	-0.674855	-2.11871	13	cg15395329, cg00919143, cg22173837, cg04920270, cg13692433, cg20268522
NAA25	0.00139876	0.0339824	0.45506	-0.708187	-2.11827	11	cg10294200, cg24638271, cg07706687, cg01030173, cg20979926, cg16587594, cg20884502
KAT5	0.000462763	0.0184427	0.498493	-0.636563	-2.11795	17	cg18896539, cg02124605, cg02561205, cg27133880, cg05138272, cg14726348, cg20423942, cg00582417, cg24874776, cg22114498, cg07564927, cg05785768, cg11480243, cg20108992
TIGD1	0.00037875	0.0162704	0.498493	-0.560238	-2.11685	26	cg07590839, cg18867375, cg17935173, cg03566780, cg15243454, cg12405341, cg05911928, cg08940762, cg01011757, cg24880821, cg23743058, cg15957524, cg02359411
PYCARD	0.00161346	0.0362983	0.45506	-0.639505	-2.11634	15	cg15468095, cg09115984, cg21107590, cg08730348, cg07461837, cg00244979
DKKL1	0.00185916	0.0389024	0.45506	-0.674072	-2.11625	13	cg13262105, cg08593051, cg03061811, cg05088512, cg26727980, cg20208858, cg27024876, cg22343640, cg10469286, cg22750364, cg21589115, cg05022225
SDHAP3	0.000359444	0.0158972	0.498493	-0.835338	-2.11601	7	cg21167402, cg24960960, cg08422420, cg21931717
JAG1	0.00161346	0.0362983	0.45506	-0.639291	-2.11563	15	cg05799256, cg23643330, cg05419505, cg13151266, cg00051068, cg10611115, cg02683085, cg13592385
DBR1	0.00160309	0.0361624	0.45506	-0.758498	-2.11547	9	cg25188949, cg07464355, cg17918682, cg12823953, cg25096456
GDF6	0.00164384	0.0365172	0.45506	-0.726976	-2.1151	10	cg15152894, cg09730795, cg03734437, cg05552220, cg14407420, cg00421139
SLC35A1	0.00162958	0.036477	0.45506	-0.758205	-2.11466	9	cg04137380, cg27169166, cg26394619, cg20648632, cg27146131, cg17341703, cg05977147
VGLL3	0.00145416	0.0348496	0.45506	-0.706819	-2.11418	11	cg07558275, cg17811545, cg20109541, cg16373010, cg06251539, cg12726110, cg02126446, cg09376680, cg08616593
PTGES3	0.000990036	0.0276525	0.45506	-0.660465	-2.11414	14	cg03226218, cg16823406, cg05562751, cg08027110, cg24320563, cg22366350, cg18494884
APIP	0.000666893	0.022071	0.477271	-0.695586	-2.11409	12	cg25931580, cg24460113, cg21916100, cg15745106, cg08318506, cg11622362, cg20541753, cg20869710, cg17147794
TNIK	0.000630778	0.0214222	0.477271	-0.799122	-2.11392	8	cg20532972, cg21413905, cg07203134
LSR	0.000666893	0.022071	0.477271	-0.6955	-2.11383	12	cg24977254, cg06330142, cg03521258, cg21262073, cg16612742
ARID2	0.00145416	0.0348496	0.45506	-0.706642	-2.11365	11	cg00035453, cg14817975, cg20877895, cg27515949, cg23932241
CAPZA1	0.000258774	0.0131139	0.498493	-0.57899	-2.11336	22	cg21499782, cg19260885, cg18768400, cg17861791, cg00224275, cg03503114, cg17081063, cg12664323, cg06157285, cg07003563, cg02661426, cg06860218
IWS1	0.000990036	0.0276525	0.45506	-0.660181	-2.11323	14	cg18451256, cg10180764, cg02592214, cg22409775, cg23570261, cg02372421, cg19409088, cg23623107
ZFP28	0.00164384	0.0365172	0.45506	-0.726275	-2.11306	10	cg25963041, cg16983237, cg21970554, cg09478324, cg23850212, cg22054362, cg24152605, cg12973930
NUDT5	0.000854262	0.0253414	0.477271	-0.566884	-2.11301	23	cg05164094, cg01723142, cg01867280, cg11203153, cg16595404, cg27255378, cg18634342, ch.10.345533F
SH2D5	0.00043707	0.0177195	0.498493	-0.606895	-2.11293	19	cg04923513, cg26840598, cg05704196, cg16172837, cg16455037, cg23841903, cg20567404
HNRNPD	0.000990036	0.0276525	0.45506	-0.660083	-2.11292	14	cg16438432, cg11962841, cg19105459, cg03853253, cg10358816, cg01942445, cg12023589, cg02101219, cg07964133, cg16629967, cg05949034
C1orf9	0.00167057	0.0368168	0.45506	-0.726128	-2.11263	10	cg17809276, cg09247534, cg20853148, cg18280007, cg20525378, cg00978910, cg16301215
FAM123A	0.00051105	0.0193107	0.477271	-0.634843	-2.11223	17	cg24296626, cg07920503, cg22029275, cg22141111, cg03369269, cg11030811, cg05438320, cg14880499, cg04323814, cg06779705, cg18034232
NPC2	0.00164362	0.0365172	0.45506	-0.63809	-2.11165	15	cg01837320, cg06291595, cg05076775, cg06868247, cg16374328, cg01311559, cg01680773, cg10317198
TRIM33	0.00167057	0.0368168	0.45506	-0.72578	-2.11162	10	cg02852257, cg23555187, cg20932765, cg09320437
C17orf28	0.00145416	0.0348496	0.45506	-0.705836	-2.11124	11	cg08449860, cg13745142, cg00806198, cg20935945, cg03443162
HADHA	0.00164362	0.0365172	0.45506	-0.637843	-2.11084	15	cg08235500, cg00747065, cg26119090, cg01355520, cg00966762, cg03330302, cg21903765, cg07203352, cg26949087, cg20517616, cg19386576
ZNF583	0.000831528	0.0250477	0.477271	-0.635191	-2.11035	16	cg02776314, cg20118020, cg08342619, cg03812920, cg27129744, cg07129725, cg14684842, cg11718235, cg16620731, cg24119079
MRPL47	0.00164362	0.0365172	0.45506	-0.637644	-2.11018	15	cg03046746, cg13601225, cg25478109, cg12979743, cg18754754, cg23168649, cg18652121, cg15559398
GSPT2	0.00167057	0.0368168	0.45506	-0.72522	-2.10999	10	cg10371310, cg19094615, cg07819186, cg26909705, cg21258987, cg12967624, cg12165338, cg04238575
LOC100132215	0.00167378	0.0368459	0.45506	-0.637574	-2.10995	15	cg12376047, cg26313088, cg00445126, cg18126442, cg15402210, cg00157515, cg06528559, cg27344587, cg13433250, cg17583946, cg22197050
C17orf91	0.00148185	0.0350387	0.45506	-0.70528	-2.10958	11	cg06552751, cg08651631, cg15771370, cg20876723, cg13101624, cg02659149, cg26102512, cg11099291
NDST3	0.00173557	0.0374022	0.45506	-0.755946	-2.10835	9	cg23694616, cg00508526, cg10118828, cg06132694, cg23063036
PCDHGB6	0.00169729	0.0372371	0.45506	-0.724493	-2.10787	10	cg03898577, cg07613945, cg22463553, cg18617005, cg13254082, cg18507379, cg06157602
IGFBP7	0.00156495	0.0358015	0.45506	-0.70443	-2.10704	11	cg03023052, cg01959562, cg00884221, cg03195531, cg21921384, cg11597475, cg08924554, cg19045644
WDR75	0.000687843	0.0224211	0.477271	-0.692815	-2.10567	12	cg11815639, cg27370131, cg06522063, cg18921061, cg04170442, cg06257029, cg13259821, cg10426652, cg12791010
ELOVL6	0.00176425	0.0375091	0.45506	-0.636273	-2.10564	15	cg27410858, cg25019126, cg16584286, cg11423717, cg04249586, cg23200970, cg25313892, cg03835987, cg26225025
ZNF660	0.00175075	0.0374803	0.45506	-0.723715	-2.10561	10	cg01139508, cg11542789, cg03340649, cg22598028, cg15372508, cg17536166, cg21771463, cg15688619
ZNF235	0.00175075	0.0374803	0.45506	-0.723686	-2.10553	10	cg19280530, cg13757989, cg27585874, cg02993145, cg08271318, cg15111345, cg00852139
HAND2	0.000389784	0.0165299	0.498493	-0.532649	-2.10531	28	cg03905758, cg22517735, cg08328610, cg20474850, cg04825850, cg15195321, cg21530280, cg05496192, cg25102370, cg00443971, cg02774439, cg26101410, cg19178853, cg07969748, cg05536800
UBE2T	0.00202946	0.0407567	0.431708	-0.670514	-2.10508	13	cg11819639, cg13395333, cg17199631, cg26399396, cg02926368, cg16993579
PUS10	0.000399233	0.0166793	0.498493	-0.532353	-2.10414	28	cg13196962, cg26562600, cg01758312, cg11879028, cg22045371, cg17673205, cg17936862, cg04107082, cg07695257, cg19449219, cg13565723, cg24877391, cg11736869, cg00414572, cg08445701, cg18625361, cg00298910, cg00808766, cg07546878
MEIS1	0.000732646	0.0235658	0.477271	-0.79533	-2.10389	8	cg02609473, cg01406988, cg12975220, cg05930133, cg02209932, cg05098471
ID1	0.000445089	0.0179326	0.498493	-0.604186	-2.1035	19	cg27634884, cg09569033, cg11815991, cg20993243, cg00494337, cg05194250, cg26310240, cg11850311, cg24015467, cg26475299, cg27562717, cg19033308, cg14353231
ATP6V0A1	0.0019452	0.0398458	0.45506	-0.634934	-2.10121	15	cg08749686, cg04157072, cg20082357, cg06927775, cg17176108, cg07408552, cg14014527, cg05299486, cg20530580, cg04900999, cg18491199
FAM76B	0.000653594	0.0218164	0.477271	-0.616802	-2.10069	18	cg27145422, cg18394519, cg25478527, cg09014478, cg03916912, cg09877105, cg03412097, cg04303269, cg06044117, cg27261641, cg00671093, cg25622487
AGPAT9	0.000454028	0.0182173	0.498493	-0.555807	-2.1001	26	cg24260320, cg16236108, cg20506403, cg02759647, cg12741867, cg05756848, cg24603081, cg02768101, cg22089878, cg06412434, cg23853768, cg04149980, cg26071978, cg10685945
ZNF665	0.00159264	0.0361072	0.45506	-0.70199	-2.09974	11	cg07950216, cg01620580, cg07686635, cg11265561, cg17169289, cg25526475
ERLEC1	0.000653594	0.0218164	0.477271	-0.616492	-2.09963	18	cg10440923, cg17235978, cg15418474, cg13467814, cg00063567, cg01135477, cg08665704, cg02079951, cg16108521, cg03390569, cg03322619, cg00140842, cg04849907, cg18256236
DHFRL1	0.000284438	0.0139425	0.498493	-0.575209	-2.09956	22	cg14459352, cg23498877, cg16463395, cg20170443, cg09619475, cg17767184, cg25581063, cg20852286, cg26301639, cg04499690
RAB2B	0.000672008	0.0221649	0.477271	-0.576396	-2.09838	21	cg03530172, cg07587209, cg25556343, cg11080530, cg20263096, cg13091707, cg27169539, cg10892375
NUDT15	0.00228491	0.0442872	0.431708	-0.668071	-2.09741	13	cg18760916, cg18950578, cg01596986, cg11071591, cg06093354, cg18781764, cg11473104
HOXA1	0.0021563	0.0427743	0.431708	-0.633694	-2.09711	15	cg00288327, cg02978421, cg04167903, cg03700462, cg03116258, cg12686016, cg27180314, cg26744375, cg15218775, cg04673590
ZSWIM1	0.00162034	0.0363689	0.45506	-0.701091	-2.09705	11	cg14335121, cg23271318, cg23610053, cg06439777, cg25630211, cg25887850, cg03710119
HOXD12	0.00231329	0.0446984	0.431708	-0.6676	-2.09593	13	cg17512364, cg23130254, cg03874199, cg12503267, cg06571387, cg01405040, cg03964958, cg20292112, cg18022224, cg12268637, cg02694427
TMEM198	0.00231329	0.0446984	0.431708	-0.667518	-2.09567	13	cg13055713, cg27185933, cg15253243, cg20919680, cg05401428, cg04118884
MAFB	0.000607625	0.0209873	0.477271	-0.629438	-2.09425	17	cg20224984, cg24033330, cg05573182, cg18251612, cg13188011, cg12499119, cg20518154, cg16844989, cg12902062, cg23791813, cg14102676, cg02497758
CROT	0.000677653	0.022251	0.477271	-0.614597	-2.09318	18	cg16063666, cg18952098, cg11252776, cg19642189, cg12969170, cg07582133, cg02673015, cg14001567, cg21526343
HJURP	0.00128338	0.032364	0.45506	-0.653901	-2.09313	14	cg13022642, cg14664879, cg18553762, cg06310422, cg27143307, cg21542780, cg06085544
PAX9	0.000207849	0.0115235	0.518848	-0.514368	-2.09296	33	cg25617340, cg04711852, cg21875330, cg19842809, cg19538655, cg00970313, cg01972418, cg01672943, cg04426862, cg00762160, cg10911990, cg04243401, cg21207665, cg11194925, cg07459252
ORMDL2	0.000314378	0.014849	0.498493	-0.57337	-2.09285	22	cg21667943, cg04346539, cg24775313, cg22575599, cg18710288, cg06990019, cg14657159, cg05584675, cg20959240, cg08799692, cg03744975, cg20260663
PPP3CA	0.000607625	0.0209873	0.477271	-0.629017	-2.09285	17	cg26454299, cg25433855, cg07751222, cg01943657, cg07809618
PLA2G16	0.00215952	0.0427946	0.431708	-0.750221	-2.09239	9	cg15219506, cg05897048, cg06235847, cg12066398, cg16484943, cg03627015, cg13916322
TRPC6	0.00239756	0.0454742	0.431708	-0.631996	-2.09149	15	cg23644960, cg18137040, cg00967884, cg04553838, cg22123490, cg18239414, cg24842731, cg03411507, cg07931431, cg07013734
SNCB	0.000750897	0.0239775	0.477271	-0.688144	-2.09148	12	cg14696254, cg01382414, cg07003542, cg07035740, cg03607359, cg13786191
ZNF202	0.00173113	0.0373479	0.45506	-0.6992	-2.09139	11	cg05236037, cg06038239, cg01843663, cg06130950, cg25784936
PCDHA11	0.00251198	0.046631	0.431708	-0.666064	-2.09111	13	cg13762451, cg01369220, cg22869668, cg12091708, cg08974687
ISCU	0.000720295	0.0232069	0.477271	-0.574299	-2.09075	21	cg24903225, cg13240898, cg13381718, cg14419151, cg13470919, cg21167558, cg06530240, cg19162598, cg14690343, cg01972961, cg23951927, cg17319365, cg03827423
LRRTM3	0.00173113	0.0373479	0.45506	-0.698705	-2.08991	11	cg01207912, cg09455274, cg19837720, cg05626013, cg27251384, cg22516804
PALM2	0.00251198	0.046631	0.431708	-0.66565	-2.08981	13	cg05720571, cg08198400, cg11849422, cg00752376, cg00254793, cg00856839, cg02442436, cg09609266, cg09547698
MALT1	0.00132738	0.0328218	0.45506	-0.652782	-2.08955	14	cg17903999, cg23450680, cg15252509, cg24182998, cg03361575, cg04632255, cg16637619, cg25075644, cg07997844, cg10897648
CALCB	0.00239756	0.0454742	0.431708	-0.631368	-2.08941	15	cg22536580, cg09929831, cg23721036, cg02907374, cg01616682, cg19199711, cg10846356, cg26608883, cg25372278, cg06938878, cg05514418, cg08896945, cg06839970
NHSL1	0.000335764	0.0151778	0.498493	-0.572405	-2.08933	22	cg21543918, cg06881310, cg16292132, cg01615880, cg04850961, cg25989075, cg02705163, cg16027412, cg15444048
PAX5	0.00132738	0.0328218	0.45506	-0.652647	-2.08912	14	cg00204390, cg18889595, cg00953480, cg06204376, cg06561106, cg10059959, cg00464519, cg03791373, cg23042700
CCNG1	0.00098991	0.0276525	0.45506	-0.628786	-2.08907	16	cg20477999, cg01893681, cg10852661, cg08970050, cg18020381, cg04084172, cg04232649, cg17876308, cg17381847
GTF3C1	0.00239756	0.0454742	0.431708	-0.63124	-2.08899	15	cg04714248, cg08478193, cg27461883, cg19571071, cg04247218, cg07907998, cg04179668, cg16365265, cg05096690, cg05300937
CNOT8	0.000470102	0.0185562	0.498493	-0.528504	-2.08893	28	cg08572808, cg01485196, cg10508639, cg17575087, cg10214058, cg20776454, cg18632102, cg10270698, cg09890088, cg26014228, cg11372683, cg26759387, cg05428781, cg08873008
SNORD104	0.000923766	0.0263972	0.477271	-0.789651	-2.08887	8	cg24139916, cg20969675, cg00614969, cg26529556, cg12977686, cg20850195, cg12274314
CCDC62	0.00173113	0.0373479	0.45506	-0.698289	-2.08867	11	cg10194844, cg12861107, cg04998435, cg04465834, cg06604690, cg12552232, cg14127396, cg26594398, cg08775774
ZNF234	0.00251198	0.046631	0.431708	-0.665234	-2.0885	13	cg23489630, cg13838055, cg09932439, cg06181301, cg13747803, cg23532246, cg16938305
FEZF2	0.000709731	0.0230189	0.477271	-0.613171	-2.08832	18	cg18902742, cg27564792, cg13304093, cg06707343, cg25082847, cg08252579, cg14651453, cg24705960, cg06423920, cg19227130, cg11374425, cg14261840, cg19629292
ISCA2	0.00248803	0.0464656	0.431708	-0.63099	-2.08816	15	cg01837320, cg06291595, cg05076775, cg06868247, cg16374328, cg01311559, cg01680773, cg10317198
KIAA1279	0.000750897	0.0239775	0.477271	-0.687044	-2.08813	12	cg18947032, cg22692790, cg05483617, cg04241725, cg26082690, cg12062489, cg10822447, cg09420665, cg15558658
KCNH8	0.00191112	0.0395643	0.45506	-0.717617	-2.08787	10	cg02210104, cg23053624, cg24668089, cg07657236, cg23011597, cg19691993, cg01398050, cg25849262, cg24997944
SCFD2	0.00100575	0.0278849	0.45506	-0.628319	-2.08752	16	cg00112056, cg14992181, cg12245795, cg13271594, cg15778811, cg14079414, cg08225341, cg11799233, cg00292637
LHX8	0.000576321	0.0206501	0.477271	-0.55775	-2.08644	24	cg20594809, cg25289697, cg01185626, cg23451528, cg10249828, cg10714415, cg10029842, cg08587354, cg22694818, cg17473600, cg07563793, cg00419321, cg01622379, cg01259156
GATA6	0.00173113	0.0373479	0.45506	-0.697404	-2.08602	11	cg22446331, cg17995867, cg05971503, cg03473387, cg07361491, cg12356311, cg02634712, cg18632712
PPME1	0.00127278	0.0323345	0.45506	-0.559431	-2.08523	23	cg27203558, cg16400434, cg07712444, cg21493666, cg16399312, cg01452167, cg00469635, cg23558650, cg25310822
OSR1	0.00127278	0.0323345	0.45506	-0.559376	-2.08503	23	cg19226872, cg15237819, cg11950994, cg14157048, cg10521706, cg06279113, cg10978282, cg03489023, cg00954878, cg16418862, cg22478121
WNT5A	0.000760535	0.0241287	0.477271	-0.572527	-2.08429	21	cg21498653, cg08514735, cg08174718, cg15361065, cg15051960, cg15190013, cg15183882, cg24080313, cg15345351, cg22615158, cg09615965, cg24942186
ZNF154	0.00175883	0.0375091	0.45506	-0.696768	-2.08412	11	cg05661282, cg27049766, cg08668790, cg01268824, cg03234186, cg12506930, cg21790626, cg26465391, cg00983956
EPHX3	0.00257851	0.0470751	0.431708	-0.629605	-2.08358	15	cg16184495, cg15826897, cg19744936, cg26010734, cg17399362, cg18366919, cg24745495, cg14556683
FAM46B	0.000778967	0.0241766	0.477271	-0.685524	-2.08351	12	cg08830553, cg15938711, cg22395192, cg05514349, cg24481381, cg13782884, cg09257349, cg06606318
CYP2F1	0.000987473	0.0276525	0.45506	-0.787231	-2.08247	8	cg17222579, cg13676449, cg01454153, cg26859042, cg06210526
CHMP5	0.00260866	0.0472794	0.431708	-0.629217	-2.08229	15	cg14213824, cg23689916, cg27400713, cg08213399, cg01177235, cg18578708, cg27514014
E2F3	0.000361427	0.0159126	0.498493	-0.570377	-2.08193	22	cg18363568, cg27250759, cg26171446, cg21803390, cg21079802, cg10448593, cg00153662, cg27301331, cg16309248, cg05617744, cg26080798, cg08298587, cg15585670
CCT7	0.000773704	0.0241287	0.477271	-0.583439	-2.08186	20	cg14912896, cg06642617, cg12972213, cg13685329, cg13663190, cg14421218, cg00655779, cg05291385, cg14067052, cg26478621, cg03317826, cg19543987
SKP1	0.000525283	0.0196956	0.477271	-0.597926	-2.0817	19	cg01067626, cg08584618, cg08024561, cg08431089, cg26922706, cg09613648, cg00854995, cg06751596
TXN2	0.00178652	0.0378712	0.45506	-0.695826	-2.0813	11	cg17793848, cg24403968, cg16924664, cg06293195, cg16199098, cg11423990, cg21778268, cg11063167
ZNF141	0.000778967	0.0241766	0.477271	-0.684739	-2.08113	12	cg11765430, cg07190698, cg03322548, cg22687239, cg00573330, cg24802771, cg13447915
COG7	0.00259713	0.0472794	0.431708	-0.662756	-2.08072	13	cg26809911, cg05370569, cg10208294, cg10692753, cg01375172, cg26703483, cg27196102, cg01655607
DCC	0.000361427	0.0159126	0.498493	-0.570001	-2.08055	22	cg14268020, cg25122395, cg18801691, cg02837027, cg21263710, cg14222939, cg05416337, cg07935012, cg25204852, cg16964748, cg00027400, cg07897248, cg19613722
PRDM1	0.000505922	0.019297	0.477271	-0.550558	-2.08027	26	cg26351406, cg07331652, cg19577529, cg25608130, cg10573915, cg00555933, cg24793124, cg17143179, cg05170275, cg08204053, cg11072009, cg01761420, cg02667677, cg22196848, cg14359052, cg23778363, cg08742502, cg12589564
TOX4	0.000525283	0.0196956	0.477271	-0.59728	-2.07945	19	cg03530172, cg07587209, cg25556343, cg11080530, cg20263096, cg13091707, cg27169539, cg10892375
C12orf65	0.000210368	0.0115971	0.518848	-0.518165	-2.07942	32	cg01188069, cg02339418, cg19367466, cg25424237, cg16138158, cg05881947, cg10073303, cg19031841, cg08894685, cg08750057, cg13371907, cg26068169
TMSB4X	0.000793002	0.0242639	0.477271	-0.684176	-2.07942	12	cg17625764, cg03120461, cg02522370, cg21119901, cg21013536
TTLL5	0.00110078	0.0294918	0.45506	-0.625578	-2.07841	16	cg24045810, cg26044711, cg07932479, cg18638383, cg09430689, cg22776257, cg16578355, cg08865886, cg17345366
RPSA	0.000541322	0.0201195	0.477271	-0.596821	-2.07785	19	cg14644209, cg17616205, cg07087116, cg17944282, cg17080073, cg15750315, cg23633526, cg01798443, cg03591561, cg07564019
RPL21P28	0.00181422	0.0383331	0.45506	-0.694673	-2.07785	11	cg08921970, cg06459020, cg22600945, cg12584034, cg10779375, cg23460137, cg03402794, cg22625347
CAGE1	0.00139236	0.0339148	0.45506	-0.557248	-2.07709	23	cg25551918, cg15324969, cg07157058, cg19198764, cg03969138, cg02013957, cg22804502, cg05371005, cg27260630, cg05907686, cg07900658
NNT	0.000382813	0.0163142	0.498493	-0.568951	-2.07672	22	cg08358683, cg09489281, cg07848310, cg12626968, cg12656077, cg04215256, cg11843640, cg03902565, cg24153889, cg26317056, cg12253865, cg00452016, cg14635187, cg08052882, cg13102118
TRAPPC6A	0.000813984	0.0247116	0.477271	-0.609521	-2.07589	18	cg27567587, cg19703494, cg22769810, cg07928695, cg11961288, cg15150615, cg18405297, cg15176664, cg04881464, cg23256630, cg00555293, cg11589573
FTSJ3	0.000408476	0.0168071	0.498493	-0.568044	-2.07341	22	cg25654072, cg00691529, cg25570360, cg08730330, cg06024079, cg19877921, cg23090583
PIAS3	0.00192501	0.0397357	0.45506	-0.693045	-2.07298	11	cg11246695, cg04921814, cg08818139, cg01715562, cg05768362, cg11344430, cg15978276, cg23995917, cg23373718
TRPC7	0.000849143	0.0252635	0.477271	-0.681772	-2.07211	12	cg10761295, cg07572966, cg25886996, cg06448705, cg00118989, cg14006900, cg02773435, cg23409403, cg17275074, cg23288973, cg22770135
NDUFB5	0.00225859	0.0439699	0.431708	-0.712184	-2.07206	10	cg03046746, cg13601225, cg25478109, cg12979743, cg23168649, cg15559398
ERCC3	0.00255697	0.0470309	0.431708	-0.742827	-2.07177	9	cg26107076, cg13422881, cg09520855, cg07455051, cg16458455
CDH4	5.1685e-07	0.000314309	0.659444	-0.417557	-2.07174	94	cg16997807, cg22079931, cg25418743, cg19801831, cg12923331, cg13786944, cg14146112, cg04881002, cg21077074, cg12687332, cg21952799, cg21195953, cg09813632, cg15534366, cg27639546, cg15549873, cg04863665, cg11230111, cg00942432, cg06244177, cg22970969, cg11024496, cg22813391, cg16007403, cg13970791, cg19921985, cg01229489, cg08290240, cg16379868, cg24711888, cg08903736, cg21996645, cg05908227, cg2…
WT1	0.000821394	0.0247819	0.477271	-0.580502	-2.07138	20	cg07565441, cg12600018, cg02475197, cg07193766, cg21548155, cg03669907, cg26232818, cg14657517, cg22975913, cg19126300, cg15107670, cg19570244, cg19074340
NDUFA11	0.000792726	0.0242639	0.477271	-0.622278	-2.07043	17	cg02434381, cg14789178, cg18891387, cg16868177, cg19530883, cg04582374, cg14508733, cg22854549, cg25730138, cg24321432, cg26378629
MLC1	0.000597458	0.0209865	0.477271	-0.594324	-2.06916	19	cg11674130, cg20266220, cg07863159, cg19194233, cg03677952, cg25127852, cg18093120, cg05861567, cg19349372, cg22970987
C3orf26	0.000800774	0.0244249	0.477271	-0.621816	-2.06889	17	cg15077343, cg03275067, cg13477253, cg08539350, cg01854420, cg11168235, cg06062590, cg03059470, cg05642802, cg04739149
DAXX	3.12232e-05	0.00377394	0.557332	-0.475231	-2.06853	48	cg12832355, cg27393652, cg13443893, cg18279148, cg04086445, cg11111423, cg02173004, cg24328964, cg03369465, cg14539675, cg24728112, cg20763184, cg20223162, cg17079757, cg08567382, cg14622330, cg09615909, cg04152866, cg03382121, cg12923297, cg04488476, cg27052777, cg18944910, cg07689821, cg24496586, cg06171013, cg05532204, cg08375286, cg24513883, cg03085224, cg12727605
LRRC45	0.00148871	0.0351582	0.45506	-0.646213	-2.06852	14	cg21828899, cg19001231, cg15578811, cg11040439, cg04489846, cg04875987, cg17241816, cg00056628, cg10645943
SLITRK3	0.000897746	0.0259201	0.477271	-0.568168	-2.06843	21	cg17211349, cg02580197, cg13619915, cg00741295, cg00665492, cg25198481, cg03177600, cg18447727, cg06312254, cg19532307, cg04228468, cg04481181, cg01882260, cg09269007
ZNF12	0.00151819	0.035433	0.45506	-0.645793	-2.06718	14	cg09123307, cg05006567, cg25878452, cg00504951, cg12592779, cg00387323, cg15240064, cg20942782, cg25845323, cg17766707
COL23A1	0.00122748	0.0317486	0.45506	-0.622157	-2.06705	16	cg20546002, cg23437733, cg26667699, cg08496276, cg10354549, cg10730712, cg22960186, cg11256387, cg04591034, cg26996818, cg25552435
LRRCC1	0.000891248	0.0258909	0.477271	-0.679885	-2.06638	12	cg05242148, cg06900861, cg08165661, cg05570314, cg24317002, cg13580934, cg25774237, cg07280489, cg21816001
ANKRD35	0.000891248	0.0258909	0.477271	-0.679851	-2.06627	12	cg27582948, cg12424475, cg03961800, cg11672099, cg26261172, cg18762736
GSTM3	0.000891248	0.0258909	0.477271	-0.679808	-2.06614	12	cg04545003, cg02880629, cg11913652, cg26020161, cg25027501, cg08525331
CHMP4B	0.000905283	0.0259835	0.477271	-0.679763	-2.066	12	cg04653776, cg08428707, cg25390476, cg00997172, cg24300135, cg05196101, cg03355213, cg21113841, cg07996548
NKAIN3	0.000878456	0.0258229	0.477271	-0.606581	-2.06588	18	cg00277827, cg22389279, cg12380909, cg01509237, cg06410746, cg01458228, cg08855288, cg21498772
LGR5	0.00195271	0.0398629	0.45506	-0.690339	-2.06489	11	cg13435381, cg01622344, cg01103590, cg18234145, cg14561567, cg27166993, cg05670290
CSDA	0.00125504	0.0320935	0.45506	-0.780415	-2.06443	8	cg19907625, cg17544691, cg26871120, cg13836329, cg13253637, cg05406791
NEUROG1	0.00113561	0.0302248	0.45506	-0.531233	-2.06419	27	cg11248413, cg12065579, cg24899138, cg13336665, cg18362330, cg04897683, cg14958635, cg17772342, cg08285915, cg04620091, cg04330449, cg00513205, cg22630755, cg08587845, cg11260904, cg02604503, cg22734397, cg11946503, cg04469059, cg19951663
AARS	0.00088519	0.0258909	0.477271	-0.578332	-2.06364	20	cg26862620, cg06733215, cg24115784, cg01439854, cg25432323, cg09102714, cg03818826, cg08238283, cg04424379, cg06767762, cg21045174
KPNA4	0.00157715	0.0359804	0.45506	-0.644594	-2.06334	14	cg03868206, cg05068548, cg18996776, cg18004778, cg21087962, cg18987683, cg15062281
MED14OS	0.000502708	0.019297	0.477271	-0.872821	-2.06295	6	cg24682488, cg02302131, cg09504728, cg13489874, cg17165799
PRKAA2	0.00252588	0.0466796	0.431708	-0.708797	-2.06221	10	cg05894391, cg24277313, cg19083779, cg05656934, cg09763175, cg25617691, cg04876835
KCNG1	0.00125916	0.0321565	0.45506	-0.620517	-2.0616	16	cg16313393, cg20832181, cg15081220, cg17846334, cg13664475, cg18062205, cg24924779, cg26748449, cg24389970
GPR37	0.000645575	0.0217417	0.477271	-0.592067	-2.0613	19	cg17052813, cg23428445, cg02960853, cg23847172, cg17152484, cg09458673, cg14311320, cg16847696, cg13064050, cg21087674, cg12693076, cg26141626, cg27533119, cg07392724, cg24114273, cg22230167
HBM	0.0020358	0.040842	0.431708	-0.689137	-2.06129	11	cg06319822, cg07893512, cg26540367, cg05057452, cg01744019, cg09812623, cg25322095, cg01558909, cg24407589
TAF7	0.00129084	0.0324544	0.45506	-0.620116	-2.06027	16	cg19311812, cg16019898, cg18145047, cg19218029, cg26086899, cg24830062, cg06284322, cg24717875
ERH	0.000964935	0.0272931	0.477271	-0.577326	-2.06004	20	cg05195393, cg12006217, cg03328886, cg04310006, cg04509559, cg13665174, cg15358052, cg26931528, cg22294715, cg16322149, cg17926678, cg11633209
OTOP2	0.000661614	0.0220086	0.477271	-0.591485	-2.05928	19	cg03710354, cg09461395, cg06353318, cg07651040, cg04886642, cg09225321, cg02275878, cg25306087, cg19019804, cg06960693
USH1G	0.000661614	0.0220086	0.477271	-0.591485	-2.05928	19	cg03710354, cg09461395, cg06353318, cg07651040, cg04886642, cg09225321, cg02275878, cg25306087, cg19019804, cg06960693
C14orf166	0.00255261	0.046995	0.431708	-0.707711	-2.05905	10	cg19957032, cg00864261, cg09669049
CYP2S1	0.0021189	0.0422044	0.431708	-0.688277	-2.05872	11	cg03620853, cg19834071, cg02997111, cg21117476, cg17693865, cg04291888, cg04417607, cg18105767
CHCHD1	0.00131888	0.0328168	0.45506	-0.778113	-2.05835	8	cg05370102, cg00291003, cg23392730, cg23269655, cg23822264, cg04704631
HSPA1L	0.000171382	0.0105417	0.518848	-0.50173	-2.05825	35	cg26616261, cg18315695, cg22466425, cg24631716, cg18846140, cg18466674, cg17494781, cg17186760, cg15174834, cg01639032, cg03096830, cg02897359, cg10598353, cg08373989, cg05920090, cg21122656
NR4A2	0.000996833	0.0277516	0.45506	-0.575842	-2.05475	20	cg14617996, cg11399967, cg20804199, cg03953709, cg20945253, cg25247969, cg18881247, cg07646377, cg23474904, cg16246410
POLB	0.00265952	0.0477377	0.431708	-0.706091	-2.05434	10	cg25258812, cg18894794, cg16667004, cg01005518, cg21845424, cg14836868, cg27370867, cg01544807, cg20264731
PPA2	0.00101756	0.0280082	0.45506	-0.675886	-2.05422	12	cg27313662, cg25083636, cg13529269, cg14759964
ID3	0.000962447	0.0272623	0.477271	-0.616748	-2.05203	17	cg26847678, cg05969021, cg21686225, cg22258437, cg25762068, cg20485144
LTV1	0.00271298	0.0482583	0.431708	-0.705244	-2.05187	10	cg25683535, cg14222704, cg19818278, cg05215536, cg23493127, cg27408637, cg16764408
ATP5B	0.00234048	0.0450056	0.431708	-0.68591	-2.05164	11	cg22012054, cg22870344, cg06679265, cg03249590, cg01068913
PITX2	0.000184268	0.0109128	0.518848	-0.500102	-2.05157	35	cg17929238, cg20705938, cg23663774, cg13458645, cg21735256, cg26199289, cg14056644, cg05702723, cg24224020, cg08867413, cg27659787, cg18501555, cg01616926, cg09169953, cg19909239, cg23130131, cg05522383, cg17707140, cg19829847
C10orf82	0.00236817	0.0454276	0.431708	-0.685669	-2.05092	11	cg15398400, cg17349199, cg07945733, cg13707002
ZNF8	0.00271298	0.0482583	0.431708	-0.704836	-2.05069	10	cg25354520, cg20667230, cg17130812, cg15245120
COX5B	0.00105967	0.0287603	0.45506	-0.674513	-2.05005	12	cg09907096, cg16022344, cg24441121, cg15362194, cg27351477, cg00605057, cg21242684, cg07211894
SUMF1	0.00239587	0.0454742	0.431708	-0.68537	-2.05003	11	cg16643090, cg20486230, cg05843800, cg26670548, cg07911463, cg18847227, cg07465754, cg11108137
MIR142	0.00147253	0.0350283	0.45506	-0.774602	-2.04906	8	cg01951274, cg10530767, cg26112797, cg00176888, cg15035143, cg19466818
RTN1	0.000287577	0.0140609	0.498493	-0.499269	-2.049	36	cg19556814, cg21857885, cg10766546, cg27135692, cg17988158, cg01141940, cg12317080, cg08625261, cg24128130, cg20463862, cg11293157, cg15832201, cg04510871, cg23627909, cg04147372
CCDC104	0.00242357	0.0456523	0.431708	-0.684975	-2.04885	11	cg20419724, cg17158059, cg12929625, cg04842553, cg21597209, cg00980331, cg22669090
NAGPA	0.00271298	0.0482583	0.431708	-0.703868	-2.04787	10	cg07202092, cg00998410, cg06545328, cg09645516, cg09584112, cg07960787
CNP	0.00271298	0.0482583	0.431708	-0.703692	-2.04736	10	cg15248157, cg10871529, cg01366580, cg24396683, cg15935113, cg05182416
KLK7	0.00146506	0.0349388	0.45506	-0.616221	-2.04733	16	cg17103314, cg27021492, cg19471655, cg26241993, cg26172504, cg05070709, cg13096980, cg05345925, cg15732230, cg22044892, cg12667315, cg06258834
GNAI3	0.00190141	0.0395315	0.45506	-0.639463	-2.04691	14	cg19572362, cg15694127, cg07502066, cg07838205, cg24719827, cg16582156
CDH11	0.000547653	0.0201462	0.477271	-0.508331	-2.04689	31	cg12074857, cg26624576, cg08747777, cg12163490, cg04536893, cg23564028, cg15010714, cg02352722, cg16500501, cg06158347, cg15163159, cg01602001
ARRDC3	0.00108774	0.0293178	0.45506	-0.673371	-2.04658	12	cg10955034, cg12630606, cg26981201, cg11240212, cg19431963, cg00598143
NAPRT1	0.00152374	0.0354752	0.45506	-0.773627	-2.04648	8	cg07691531, cg00713939, cg01494348, cg19357499, cg13282195, cg08508337, cg15537850
ZC3H13	0.0011242	0.0300095	0.45506	-0.614982	-2.04615	17	cg11075937, cg07252602, cg04570827, cg14966220, cg22449099, cg19294256, cg21132649, cg17305638, cg23314506, cg07376541
PNRC2	0.000765867	0.0241287	0.477271	-0.587599	-2.04575	19	cg22727761, cg17755208, cg04989128, cg03384426, cg08266565, cg22401419, cg00903702, cg18825999, cg10881359, cg07066932
SLC29A2	0.00110178	0.0294918	0.45506	-0.67294	-2.04527	12	cg15507391, cg17415721, cg16909570, cg22725847, cg14684675, cg16271524, cg17208577, cg23375719, cg24420770, cg07183539
FAM174B	0.00190141	0.0395315	0.45506	-0.638894	-2.04509	14	cg26266934, cg20823977, cg25846795, cg18252731, cg03429689, cg07726241, cg23436158, cg15289316, cg25864024
SLC6A17	0.00109185	0.0293878	0.45506	-0.561508	-2.04418	21	cg14107583, cg10417901, cg00961932, cg13846697, cg16320958, cg05949020, cg01202526, cg13048512, cg11885396
HOXA4	0.000545894	0.0201195	0.477271	-0.560014	-2.0441	22	cg22997113, cg19142026, cg24169822, cg07317062, cg15196806, cg14359292, cg23884241, cg11410718, cg16651126, cg25952581, cg03724423, cg17457637, cg08203284, cg25967031, cg11015251, cg08657492
ZNF408	0.00110178	0.0294918	0.45506	-0.672238	-2.04313	12	cg11558328, cg18458295, cg25577598, cg02851825, cg25993851, cg15384392
TMED10	0.00264515	0.0476176	0.431708	-0.682823	-2.04241	11	cg18829186, cg00387731, cg18672421, cg27150010, cg02062326, cg27507375, cg23142035, cg12939298, cg06817572
SELK	0.00190141	0.0395315	0.45506	-0.637997	-2.04222	14	cg26129759, cg10472244, cg06801544, cg18697348, cg23970189, cg02759005, cg17784863, cg16814023, cg02011912, cg20791839
FBXO48	0.00156009	0.0357669	0.45506	-0.614634	-2.04205	16	cg04341202, cg03995206, cg00831048, cg22885367, cg03239202, cg16380618, cg20195957, cg26431750, cg03215730, cg09154837
LHX2	0.00264515	0.0476176	0.431708	-0.682603	-2.04175	11	cg10755973, cg07109287, cg18904346, cg04456155, cg06177522, cg13964092, cg05649614
C18orf55	0.00156009	0.0357669	0.45506	-0.614374	-2.04119	16	cg21789870, cg16378950, cg16479341, cg03595406, cg03959733, cg12091503, cg19578388, cg15974085, cg20250274, cg05386387
ADAMTS1	0.00282042	0.0495356	0.431708	-0.70136	-2.04057	10	cg23737229, cg13758712, cg24262066, cg11189837, cg02855633, cg00472814, cg12282100
ZNF625	0.00282042	0.0495356	0.431708	-0.701302	-2.0404	10	cg17892556, cg17287725, cg02914087, cg00875960, cg24115221, cg06429617, cg17456704
FOXL2	0.00180272	0.0381661	0.45506	-0.547151	-2.03946	23	cg01379240, cg25670330, cg05386493, cg23637494, cg25509697, cg13894046, cg11293699, cg07135614, cg04111064, cg17503456, cg14312526, cg18755942
EN2	0.00196037	0.0398629	0.431708	-0.636748	-2.03822	14	cg13913332, cg13677571, cg14036479, cg10481660, cg17803868, cg12034383, cg20767111, cg11648289, cg16313026, cg12508286
SATB2	6.81953e-05	0.00592447	0.538434	-0.467754	-2.03819	46	cg21485895, cg25928603, cg12960893, cg03447810, cg12938338, cg16439564, cg27352019, cg17276976, cg01651170, cg07582470, cg23994043, cg23244253, cg13612316, cg22973789, cg20785796, cg17204275, cg01413546, cg17604404, cg24090090, cg07855083, cg05358815, cg18638206, cg26792080, cg26658341, cg21599020, cg26101402, cg10185119
EPHA5	0.000588877	0.0207601	0.477271	-0.55803	-2.03686	22	cg01101647, cg13701273, cg25798792, cg12682684, cg14810013, cg09009536, cg10554702, cg02463418, cg17644293, cg09448373, cg05191076, cg02355420, cg14386496, cg03143681, cg13796804, cg06622379
CLCN4	0.000626592	0.0213546	0.477271	-0.505204	-2.0343	31	cg03670355, cg04512693, cg23156100, cg05255078, cg11475300, cg15635780, cg10775576, cg07275665, cg12516234, cg05226107, cg04297907, cg18350620, cg10246296, cg14973339, cg02383649, cg03627993
PRR13	0.00163944	0.0365172	0.45506	-0.612033	-2.03341	16	cg17984924, cg17940575, cg23344935, cg07223803, cg00054511
VCAN	0.00149823	0.0352539	0.45506	-0.523261	-2.03321	27	cg06505989, cg15114672, cg16431436, cg17771652, cg08288083, cg14997132, cg14307944, cg15336997, cg02371408, cg17130678
PARS2	0.00196037	0.0398629	0.431708	-0.635007	-2.03265	14	cg06221218, cg10322308, cg22854393, cg03961984, cg08168431, cg17429631, cg18014844, cg15083887, cg11084629, cg22389964, cg21815261
RPL35A	0.00196037	0.0398629	0.431708	-0.634934	-2.03242	14	cg23439012, cg23900982, cg20526303, cg27132393, cg22857817, cg10130344, cg25786758, cg08966155, cg21728791
MTDH	0.00196037	0.0398629	0.431708	-0.634785	-2.03194	14	cg05489927, cg14869203, cg05237543, cg25544073, cg08874788, cg00265490, cg08456760
STX10	0.00196037	0.0398629	0.431708	-0.634552	-2.03119	14	cg21292858, cg11158440, cg11025793, cg07500976, cg17712202, cg21611145, cg09174357
REEP1	0.0012536	0.0320935	0.45506	-0.610471	-2.03114	17	cg02870945, cg06060731, cg04305599, cg11915205, cg11722766, cg26886277, cg24591029, cg27179172
SPATA6	0.00120002	0.0313035	0.45506	-0.668237	-2.03097	12	cg01838482, cg00788461, cg05671516, cg01931775, cg18464784, cg21084142, cg11915739
CNGA3	0.00123607	0.0318173	0.45506	-0.56908	-2.03062	20	cg21488538, cg05564412, cg03015784, cg22408697, cg00209520, cg10583000, cg13933835
CYBASC3	0.000862338	0.0255165	0.477271	-0.583087	-2.03004	19	cg08792797, cg11786302, cg08048279, cg03324175, cg06240542, cg20528048, cg14363636, cg06052471, cg24560288, cg17449018
LRRIQ3	0.00120508	0.0313513	0.45506	-0.557542	-2.02974	21	cg16741816, cg04835163, cg06366937, cg00005434, cg06997167, cg03837750, cg21446242, cg19827606, cg18854765, cg23364470
PCDHA10	0.0012536	0.0320935	0.45506	-0.609941	-2.02938	17	cg12193929, cg11595575, cg14676529, cg25754158, cg18283342, cg23932782, cg21450108, cg02829712, cg13592931
TMEM167B	0.00122809	0.0317486	0.45506	-0.667621	-2.0291	12	cg23280418, cg00402812, cg22510442, cg22680931, cg09432166, cg08945988, cg16312414, cg13186846
CCDC85A	0.0017031	0.0372386	0.45506	-0.610594	-2.02863	16	cg06241374, cg22941974, cg03896589, cg01312858, cg08096062, cg17611074, cg20338300, cg21848371, cg19486482
KDM5C	0.00122809	0.0317486	0.45506	-0.66737	-2.02834	12	cg16417926, cg25603953, cg24985300, cg04927982, cg16824069, cg01859586, cg27526317
CYP24A1	0.00201933	0.0406795	0.431708	-0.633549	-2.02798	14	cg10671478, cg17997279, cg02604290, cg25220748, cg18956481, cg03307911, cg23685712, cg14595058, cg06368932, cg02143877
RPA1	0.00142801	0.034398	0.45506	-0.800169	-2.02692	7	cg09670182, cg09901733, cg26843862, cg13946118, cg17057072, cg21920539, cg02467073
PSMD13	0.00132976	0.032839	0.45506	-0.595101	-2.02678	18	cg22718774, cg18336825, cg24140832, cg03932600, cg03958208, cg04225347, cg23513443, cg08216368
CCT6B	0.001383	0.0338106	0.45506	-0.608651	-2.02509	17	cg20741429, cg25029315, cg11221508, cg10995628, cg02553070, cg00367659, cg06069179, cg19079000
NUDCD2	0.00126797	0.0322966	0.45506	-0.567454	-2.02482	20	cg12328282, cg09809720, cg20770003, cg09847085, cg22001924, cg17542225, cg11088743, cg10985680
BANF1	0.000817978	0.0247819	0.477271	-0.53586	-2.02473	26	cg04187187, cg15657666, cg07147218, cg13143994, cg19121987, cg03857673, cg02202077, cg02427764, cg04401197, cg27445169, cg04154397
SOX11	0.000925855	0.0264181	0.477271	-0.512207	-2.02451	28	cg14776201, cg14491209, cg26659079, cg12312988, cg20401252, cg15989068, cg16717065, cg07025511, cg24837370, cg18449120, cg08526991, cg08165221, cg19958021, cg04225243, cg23668184, cg18897632, cg00078318
CLYBL	0.00147601	0.0350283	0.45506	-0.79914	-2.02431	7	cg12175106, cg10972431, cg24747164, cg10504753, cg01726399, cg27435467
ARHGAP29	0.00128392	0.032364	0.45506	-0.567169	-2.0238	20	cg11630965, cg14185291, cg26513192, cg01784852, cg22950210, cg24150153, cg23257569, cg17490932, cg26229607
UNG	0.00101467	0.0279681	0.45506	-0.540993	-2.02375	24	cg20982606, cg12696399, cg11836012, cg22978941, cg15399604, cg18016466, cg08908267, cg14418138, cg18198707, cg27174387, cg17429457, cg20495247
CADM4	0.000904026	0.0259835	0.477271	-0.856164	-2.02358	6	cg14680556, cg22464423, cg16368116, cg23295478, cg09600426
NUCB2	0.00207829	0.041438	0.431708	-0.632109	-2.02337	14	cg00324733, cg21795654, cg09178514, cg17317180
CD28	0.00150001	0.0352539	0.45506	-0.798135	-2.02177	7	cg20725586, cg04098585, cg02099418, cg13651908, cg10240150, cg10098353
PTCH1	0.00021297	0.0116449	0.518848	-0.477539	-2.02153	41	cg13041311, cg14272822, cg14596987, cg25458182, cg03875450, cg13453424, cg25326740, cg04133410, cg09333871, cg21059936, cg04334429, cg14500569, cg05734301, cg14319249
SF1	0.00141535	0.0342572	0.45506	-0.60748	-2.02119	17	cg26780677, cg12553968, cg13990672, cg07025450, cg07221824, cg14988347, cg11445760, cg15065631, cg11295902, cg07437286
SESN1	0.000414213	0.0169948	0.498493	-0.492478	-2.02113	36	cg08009854, cg25508268, cg27573625, cg02366002, cg19414224, cg24313409, cg04240504, cg07604783, cg09588929, cg23274581, cg16729179, cg09553817, cg09518637, cg20232748, cg20442982, cg24424608, cg17624938, cg04424136
PDGFRA	0.000397496	0.0166793	0.498493	-0.496644	-2.02084	33	cg16718445, cg03792767, cg23209990, cg25667335, cg11351886, cg16012041, cg08038052, cg14373456, cg14777772, cg07698901, cg20121019, cg02722188, cg00873850, cg03966785, cg14872260
PTPRN	0.00129827	0.032481	0.45506	-0.664891	-2.0208	12	cg03970036, cg10140638, cg25516529, cg16166796, cg04422168, cg15119274, cg01382864, cg20671534
HOXC-AS3	0.00152401	0.0354752	0.45506	-0.797443	-2.02001	7	cg13426316, cg27247092, cg22711405, cg05090195, cg05420790, cg21898463
SASS6	0.0021962	0.0433449	0.431708	-0.630935	-2.01962	14	cg27323852, cg05432061, cg26554674, cg00165535, cg07568665, cg16182127, cg14022530, cg14711183, cg23106864, cg16727986
HPSE	0.00139423	0.0339148	0.45506	-0.592993	-2.0196	18	cg00979348, cg16101611, cg17515545, cg00849943, cg13508557, cg19763168, cg19763279, cg09221015, cg10521651, cg20587127, cg12721792
MESDC2	0.00129827	0.032481	0.45506	-0.664306	-2.01902	12	cg05159949, cg25034274, cg14679648, cg19039109, cg12158056, cg22044082
PHF21A	0.00133448	0.0329137	0.45506	-0.554459	-2.01852	21	cg02163039, cg22502704, cg06887159, cg18816170, cg16480966, cg18362489, cg16794406, cg11820818, cg08434803, cg10739684, cg07702255
PDGFC	0.00202143	0.0406795	0.431708	-0.607428	-2.01811	16	cg09848659, cg27110994, cg22451233, cg13153190, cg20736997, cg03376310, cg04419157, cg17715558, cg02200584
SLC39A3	0.00132634	0.0328218	0.45506	-0.663944	-2.01792	12	cg08301526, cg25981801, cg08265265, cg14659082, cg24861191, cg18643460, cg24604043
FAT4	0.0010074	0.0278862	0.45506	-0.579314	-2.0169	19	cg10399929, cg04373334, cg04023369, cg08644023, cg03404279, cg22911422, cg17265829, cg04459504, cg00990763, cg03947846
CPSF3	0.00141035	0.0342213	0.45506	-0.592035	-2.01634	18	cg09949845, cg20361001, cg23004591, cg07649498, cg20549545, cg23889771, cg24873957, cg07179925, cg26705461
LMNB1	0.00102352	0.028053	0.45506	-0.57888	-2.01539	19	cg20986134, cg12445693, cg06405317, cg26611836, cg18262958, cg21678934, cg14064399, cg01077085, cg15319698, cg23339321, cg05735502
GPHN	0.00102352	0.028053	0.45506	-0.578705	-2.01478	19	cg01428678, cg09345825, cg10071662, cg06330158, cg05985161, cg23418645, cg19926434, cg26048690, cg08056903, cg24111516, cg26926986, cg20844363
EOMES	0.00152858	0.035539	0.45506	-0.604928	-2.0127	17	cg15308664, cg07055504, cg14188354, cg01714811, cg01176458, cg11818703, cg13830203, cg02694810, cg12858460, cg02797548, cg06014401, cg07482337
GABARAP	0.00147483	0.0350283	0.45506	-0.590952	-2.01265	18	cg04937744, cg16879549, cg13173342, cg10182541, cg01479911, cg11209279
RSBN1L	0.001481	0.0350387	0.45506	-0.661528	-2.01058	12	cg05802532, cg17609731, cg23179249, cg18052755, cg18541469, cg24523301
SNORD27	0.0007866	0.0242587	0.477271	-0.550687	-2.01005	22	cg07611106, cg00321150, cg16663674, cg01382671, cg03601585, cg05115468, cg23385854, cg24135964, cg03438692, cg07297802, cg21733363
SIN3A	0.000194678	0.0111753	0.518848	-0.472899	-2.00942	42	cg11184237, cg03016189, cg07544511, cg08180952, cg25867650, cg09337653, cg07619069, cg12365396, cg15769256, cg15851274, cg01664094, cg07224454, cg10483776, cg17092862, cg02331594, cg07907534, cg22059910, cg05120225, cg27523423, cg03442734
TMEM126A	0.00221243	0.0435763	0.431708	-0.604604	-2.00873	16	cg11629838, cg24456602, cg26796873, cg24639862, cg12816683, cg09063262, cg18882404, cg16417437
LHFPL3	0.0019847	0.0401479	0.431708	-0.759289	-2.00855	8	cg24179888, cg06493334, cg24277791, cg09914288, cg10036918, cg10818278
MAPK7	0.00207741	0.041438	0.431708	-0.538728	-2.00806	23	cg17559549, cg27440050, cg13716873, cg17180742, cg04815426, cg26984694, cg12353516, cg03029975, cg04654365, cg03641793, cg21409450, cg19668278, cg08336152
KIAA0748	0.00150921	0.0352996	0.45506	-0.660589	-2.00773	12	cg07880109, cg25486399, cg00240653, cg16447680, cg02554168, cg19219778
RASGEF1B	0.00141535	0.0342572	0.45506	-0.551495	-2.00773	21	cg08785356, cg20419523, cg02712183, cg11899201, cg22274829, cg07915162, cg04534345, cg25036095, cg09476891, cg25994476, cg12724192, cg05898410, cg08669018
TIMM22	0.00150921	0.0352996	0.45506	-0.66054	-2.00758	12	cg05523653, cg22802068, cg17743580, cg27530058, cg26765511, cg15765054, cg19471376, cg09571097, cg08638939, cg02230085
ZNF488	0.000917961	0.0262699	0.477271	-0.53311	-2.00675	25	cg08685854, cg08341667, cg09778229, cg22361050, cg27067269, cg06994272, cg12450316, cg05787537, cg20036869, cg17300275, cg04901779, cg10688514, cg07543199, cg17460183, cg08356855
PRKCG	0.00150921	0.0352996	0.45506	-0.660226	-2.00663	12	cg04518808, cg06697294, cg14599257, cg12853461, cg08419827, cg03657031, cg14320625, cg27552287, cg00996626
FGF12	0.00109744	0.0294918	0.45506	-0.507385	-2.00545	28	cg19507527, cg01257828, cg00386551, cg01255414, cg06804312, cg17257731, cg04988476, cg13255590, cg08002883, cg02403395, cg16376000, cg22069098, cg18780257, cg23207710, cg15048660, cg10511904, cg02992632, cg16209795, cg07127762, cg03401266, cg04346397, cg04003850, cg17393267
S100PBP	0.000936412	0.0266802	0.477271	-0.532665	-2.00508	25	cg09755102, cg23150609, cg04234170, cg26430083, cg15146128, cg02048475, cg00959725, cg21774018, cg24310460, cg04360557, cg14831266
SH3GLB1	0.0014753	0.0350283	0.45506	-0.561636	-2.00406	20	cg22024145, cg02577793, cg01557171, cg09799432, cg11088137, cg06429597, cg25643399, cg18172823, cg09375944, cg06532348, cg09290554
FAM131B	0.00243203	0.0457269	0.431708	-0.625959	-2.00369	14	cg15892839, cg25775832, cg26575389, cg00292971, cg19557165, cg19601442, cg06100147, cg15153026
RPRM	0.00221476	0.0435763	0.431708	-0.537526	-2.00358	23	cg17942639, cg21130588, cg10639888, cg13167052, cg00522056, cg26649384, cg15400238, cg27420236, cg21821913, cg04011228
SFMBT2	0.000303019	0.0144905	0.498493	-0.488276	-2.00305	35	cg10588818, cg02866454, cg25291138, cg20299663, cg16664667, cg09443135, cg06352406, cg12220353, cg09762221, cg19625921, cg12328063
ZNF225	0.00230793	0.0446888	0.431708	-0.602592	-2.00205	16	cg02707280, cg01396855, cg24032981, cg25350136, cg08520228, cg21636353, cg15082520, cg25470741, cg04323379
HINT3	0.00156563	0.0358015	0.45506	-0.658712	-2.00202	12	cg10122479, cg04784633, cg19211899, cg07240721, cg15339810
PCDH21	0.00122321	0.0317486	0.45506	-0.847036	-2.00201	6	cg16678602, cg11591516, cg23076299, cg26717133, cg03611007
DDX25	0.00159384	0.0361072	0.45506	-0.657974	-1.99978	12	cg23727983, cg01736784, cg11413039, cg25537846, cg19792599, cg04609163, cg19007412, cg10319950, cg02659232
DDX49	0.00252047	0.046631	0.431708	-0.624673	-1.99957	14	cg09964705, cg17816495, cg21055532, cg10573763, cg20613442
BRIP1	0.00252047	0.046631	0.431708	-0.624558	-1.9992	14	cg06257227, cg23801987, cg13800158, cg11054620, cg05377417, cg00515161, cg00869632, cg05986149, cg11872651, cg10198124, cg12435611
CYB561D2	0.000872566	0.0257275	0.477271	-0.547586	-1.99873	22	cg12693975, cg16103332, cg12127757, cg09295416, cg13879871, cg14705524, cg15597540, cg15254424, cg02213581, cg27239147
LIG4	0.00129341	0.0324772	0.45506	-0.502607	-1.99857	29	cg25810247, cg07403350, cg21306988, cg15869021, cg03994959, cg26162150, cg01969938, cg16258721, cg27040463, cg08216792, cg17114573, cg19435206, cg05180121
HIST1H2BO	0.00216396	0.0428389	0.431708	-0.755327	-1.99807	8	cg06797525, cg07218048, cg19459093, cg10070969, cg04062567
LENG1	0.00252047	0.046631	0.431708	-0.624028	-1.99751	14	cg14103113, cg08069712, cg17168838, cg26564684, cg08646294, cg19239752, cg15665517, cg09412792, cg07884116
KCNV1	0.00180436	0.0381661	0.45506	-0.600175	-1.99689	17	cg17462793, cg05860890, cg15638055, cg13925623, cg13454407, cg17826753, cg00803179, cg25589352
KIAA2026	0.00226639	0.04406	0.431708	-0.754749	-1.99654	8	cg00313219, cg12538810, cg25608569, cg03495688, cg08793758
KIF12	0.00170667	0.0372748	0.45506	-0.656841	-1.99634	12	cg13426307, cg08666741, cg14326196, cg13983319, cg04021692, cg09419027
KDELC1	0.00161885	0.0363689	0.45506	-0.559311	-1.99576	20	cg11814571, cg22767079, cg00926502, cg03901784, cg21251000, cg13964378, cg04771820, cg06518779, cg13361007, cg10283958, cg15143833, cg24185898, cg06254406, cg08602689, cg24771121
FAT1	0.00142647	0.034398	0.45506	-0.57319	-1.99558	19	cg16248329, cg16168363, cg27475132, cg18894054, cg24410535, cg01244944, cg17090401, cg03811081, cg06286962, cg08874747, cg01261075, cg13658542
ZBTB9	0.000349636	0.0156412	0.498493	-0.486303	-1.99496	35	cg08039823, cg09892131, cg04979706, cg14853467, cg07620992, cg24891034, cg02322621, cg19326232, cg04752591, cg13553473, cg02128139, cg00408278, cg25998119, cg14837848, cg00417835, cg10427864
FAM188A	0.00254995	0.046995	0.431708	-0.623073	-1.99445	14	cg15671708, cg01845621, cg15875120, cg01714447, cg19707359, cg21501400, cg05499853
ACTL8	0.00176559	0.0375091	0.45506	-0.585574	-1.99434	18	cg03271140, cg02514715, cg08180188, cg07466820, cg25610955, cg21483173, cg03220543, cg00303507
PCDHB16	0.0016509	0.036549	0.45506	-0.558861	-1.99416	20	cg27582059, cg26569309, cg00269800, cg26389950, cg01101663, cg25596215, cg01248745
NME1	0.00176559	0.0375091	0.45506	-0.585326	-1.99349	18	cg00965052, cg19748692, cg08466881, cg01063524, cg15660466, cg00060403, cg22638842, cg11760986, cg04943737, cg04380669, cg16119972, cg10531026, cg04346272
NME1-NME2	0.00176559	0.0375091	0.45506	-0.585326	-1.99349	18	cg00965052, cg19748692, cg08466881, cg01063524, cg15660466, cg00060403, cg22638842, cg11760986, cg04943737, cg04380669, cg16119972, cg10531026, cg04346272
TTC27	0.00257943	0.0470751	0.431708	-0.622764	-1.99346	14	cg05300230, cg24300012, cg13855674, cg16149226, cg21624407, cg08075308
CEBPZ	0.00257943	0.0470751	0.431708	-0.622534	-1.99272	14	cg02625745, cg14985606, cg19998654, cg05882878, cg06359167, cg18630855, cg07695590, cg16863796, cg27274558, cg25805189
MPZL3	0.0026089	0.0472794	0.431708	-0.622481	-1.99255	14	cg13615650, cg23865598, cg26916260, cg26672590, cg14127589, cg19069882, cg20175449
MRPL49	0.00183687	0.038602	0.45506	-0.598859	-1.99251	17	cg19313758, cg15194222, cg16691477, cg13989528, cg10490271, cg01298356, cg06933752, cg01513909, cg05258139, cg00547730
GLMN	0.00183687	0.038602	0.45506	-0.598407	-1.991	17	cg08869831, cg11799600, cg01045423, cg16010723, cg04017116, cg02180333, cg24501027, cg27429627
DOCK7	0.00231761	0.0446984	0.431708	-0.752608	-1.99088	8	cg11960592, cg27123834, cg04022724, cg00357163, cg10702158, cg06547732, cg06595852
ZNF576	0.00150706	0.0352996	0.45506	-0.571672	-1.9903	19	cg18805028, cg15715542, cg04018639, cg09562240, cg08873701, cg02454210, cg13331136, cg07643904, cg11691990, cg26300975, cg05298871, cg00519346, cg07141702
PCDHB18	0.00153197	0.0355753	0.45506	-0.841952	-1.98999	6	cg18661205, cg27086874, cg11286063, cg04511041
FIG4	0.00183038	0.0385906	0.45506	-0.584265	-1.98988	18	cg20917554, cg23959518, cg07877852, cg06694616, cg25926008, cg03976567, cg02304879, cg15847400, cg03909712, cg05512669, cg14372919
ETV5	0.0026268	0.0474188	0.431708	-0.533733	-1.98944	23	cg15760943, cg23658014, cg22547764, cg18269183, cg26684511, cg02402071, cg17466567, cg21923992, cg11762904, cg27400923, cg01270378
ZEB2-AS1	0.00195601	0.0398629	0.431708	-0.785309	-1.98928	7	cg01497214, cg14022841, cg22960357, cg23267345, cg13511862
GTF2E1	0.00183687	0.038602	0.45506	-0.597754	-1.98883	17	cg27532099, cg14141775, cg27090191, cg05786287, cg24124753, cg10752028, cg20179222, cg10714940, cg21941374, cg01154234, cg12897058
SERPINA5	0.00284474	0.0498277	0.431708	-0.621178	-1.98838	14	cg15509705, cg07862738, cg00917847, cg13345783, cg06261620, cg16937611, cg11257864, cg13984563
ZNF830	0.00171501	0.037338	0.45506	-0.557151	-1.98806	20	cg20741429, cg25029315, cg11221508, cg10995628, cg02553070, cg00367659, cg06069179, cg19079000, cg25170034
ELP2	0.00171501	0.037338	0.45506	-0.55702	-1.98759	20	cg27332026, cg12339809, cg08803129, cg03278924, cg11951604, cg24525646, cg25426722, cg11826685, cg17540091, cg12954646, cg07000989
LOC148189	0.00165072	0.036549	0.45506	-0.840911	-1.98753	6	cg17871739, cg25246092, cg08220598, cg24415565
NKX6-2	0.00135265	0.0331937	0.45506	-0.499715	-1.98707	29	cg15304699, cg17996619, cg19701540, cg07055616, cg09260089, cg02306630, cg16949120, cg25485875, cg01303723, cg24659054, cg06648277, cg03905847, cg11163901, cg08444220, cg00699945, cg05904135, cg27583690, cg01384488
LOC285375	0.002028	0.0407567	0.431708	-0.784333	-1.98681	7	cg23620822, cg03553786, cg20187719
RAD54L	0.00190413	0.0395458	0.45506	-0.653568	-1.98639	12	cg17079378, cg24325883, cg01963221, cg21294209, cg03262773, cg04131943
IGFBP3	0.000585198	0.0207601	0.477271	-0.487856	-1.98508	33	cg10094651, cg16460681, cg04690927, cg10677697, cg19536059, cg24381682, cg04796162, cg09619271, cg16447589, cg23193639, cg08541297, cg24942272, cg23455440, cg11753867, cg22403266, cg02120774, cg06713098
ZNF470	0.00193234	0.0397357	0.45506	-0.653017	-1.98471	12	cg21552653, cg03153658, cg12432761, cg26982279, cg07790111, cg16722964, cg22935456, cg24334111
RBM4B	0.00281725	0.0495356	0.431708	-0.597241	-1.98427	16	cg15181807, cg25506195, cg23053568, cg27353979, cg23347400
ITGB8	0.00193234	0.0397357	0.45506	-0.652838	-1.98417	12	cg13263285, cg24049949, cg07853810, cg07345708, cg18409654, cg18461906, cg02828140, cg22483191
SIRT3	0.0026268	0.0474188	0.431708	-0.53204	-1.98313	23	cg22239605, cg22718774, cg18336825, cg24140832, cg03932600, cg03958208, cg04225347, cg23513443, cg08216368
IMMP1L	0.00158765	0.036051	0.45506	-0.569475	-1.98265	19	cg25130734, cg21508623, cg13263383, cg09616795, cg04972224, cg05635455, cg09787063, cg08626560, cg08111895, cg24531794, cg19328333
PCDH7	0.00199942	0.0404036	0.431708	-0.595436	-1.98112	17	cg06660523, cg26133769, cg18821742, cg04105342, cg25051831, cg18315963, cg24291087, cg04859706, cg13624385, cg05431842, cg03008693, cg24219058, cg10329173
FKBP14	0.00158765	0.036051	0.45506	-0.568855	-1.98049	19	cg18627480, cg13527910, cg23708842, cg03361067, cg02350474, cg16553090, cg03105133, cg24424591, cg16743785, cg24550696, cg27254813, cg11802692, cg06700964
PELI2	0.0025737	0.0470751	0.431708	-0.748629	-1.98035	8	cg19564637, cg06762902, cg06744740, cg02565863, cg14058432, cg19941270
ZIK1	0.00204518	0.0409456	0.431708	-0.651212	-1.97923	12	cg00800512, cg18435449, cg02653557, cg21911021, cg04342092, cg22444105, cg06707978, cg01046104, cg12060744, cg18579862
HNRNPA1	0.00184323	0.038694	0.45506	-0.554665	-1.97919	20	cg11338003, cg20545544, cg09060496, cg03689456, cg15708001, cg02049941, cg12263485, cg24505978, cg06399839, cg21651262, cg14017196, cg05754589, cg09158487
MTHFSD	0.00206444	0.0412464	0.431708	-0.594684	-1.97862	17	cg26436829, cg06301726, cg16359547, cg12403956, cg25370638, cg06874952, cg06599274, cg16540921, cg21890736, cg05225549
UCHL3	0.00187529	0.0391137	0.45506	-0.554348	-1.97805	20	cg07517901, cg21784919, cg12827798, cg09342320, cg01531495, cg01739963, cg11838887
RDH13	0.00266113	0.0477377	0.431708	-0.530672	-1.97803	23	cg11889478, cg10486055, cg15552461, cg04615299, cg17054951, cg05066851, cg02279127, cg18743287, cg08278892, cg05355320
NCDN	0.00187529	0.0391137	0.45506	-0.554237	-1.97766	20	cg14181387, cg18881764, cg26260588, cg12106731, cg00276532, cg27564656, cg15097913, cg07905888, cg10905247, cg08378356, cg10398408, cg19524049, cg19841187, cg02711976
VPS13C	0.00204518	0.0409456	0.431708	-0.650662	-1.97756	12	cg07478191, cg02372366, cg03502863, cg09972561, cg11579281, cg12032009
LUZP4	0.00193574	0.0397357	0.45506	-0.836391	-1.97685	6	cg14260465, cg24883860, cg11999399, cg08693325, cg03245429
RPS6KA2	0.000990431	0.0276525	0.45506	-0.495755	-1.97603	30	cg04471409, cg12308909, cg20206437, cg08186384, cg21760146, cg18775016, cg01327552, cg14574127, cg22776125, cg23327221, cg02926731, cg20515377, cg03120116, cg09987129, cg04016606
ZNF578	0.0019394	0.0397689	0.45506	-0.553661	-1.9756	20	cg26928418, cg21553182, cg25763393, cg22662231, cg20750472, cg15449323, cg13461241, cg20410171, cg14582763, cg15235999
HSPH1	0.00197146	0.0400423	0.431708	-0.553217	-1.97402	20	cg04351553, cg02093352, cg12344694, cg10362742, cg01707298, cg26946276, cg03373442, cg13741783, cg19890264
SNORA7A	0.002244	0.0438846	0.431708	-0.779089	-1.97352	7	cg26404568, cg00210098, cg10950202, cg20498895
IFI27L2	0.00224264	0.0438846	0.431708	-0.648449	-1.97083	12	cg20506250, cg02618908, cg06887170, cg05362320, cg15326801, cg16333156, cg00211719, cg05365578
BNC1	0.00269547	0.0482112	0.431708	-0.528714	-1.97074	23	cg02713760, cg07016258, cg18952647, cg06523224, cg22271562, cg19685251, cg18560204, cg17124224, cg00768409, cg20941110, cg23741520, cg14385245, cg14894702, cg27169020
CDK8	0.00224264	0.0438846	0.431708	-0.648202	-1.97008	12	cg04701243, cg09391705, cg21540848, cg00022633, cg14416337
SCNN1B	0.00153546	0.0356139	0.45506	-0.52661	-1.96995	24	cg03102879, cg16549389, cg00925717, cg26424556, cg00921759, cg07087293, cg05537253, cg25714018, cg26768712, cg03983589
ZNF350	0.00221912	0.0435763	0.431708	-0.578156	-1.96907	18	cg02573825, cg16580934, cg26498020, cg05017253, cg26146233, cg25782003, cg16018211, cg21168622
NVL	0.0022595	0.0439699	0.431708	-0.591444	-1.96784	17	cg25622749, cg01264651, cg18813989, cg25882709, cg11675327, cg22762951, cg00513003
RPL34	0.0022595	0.0439699	0.431708	-0.591242	-1.96716	17	cg17448127, cg08736516, cg11304315, cg16525761, cg16599965, cg15296129, cg18989863, cg16022748
TGFB2	0.00228391	0.0442872	0.431708	-0.577134	-1.96559	18	cg11976166, cg06899755, cg16658719, cg24763568, cg09167119, cg08746138, cg23889054, cg06674304, cg12334705
C14orf1	0.00232452	0.044743	0.431708	-0.58982	-1.96243	17	cg24045810, cg26044711, cg07932479, cg18638383, cg09430689, cg22776257, cg16578355, cg08865886, cg17345366
ZNF345	0.000707323	0.0229792	0.477271	-0.481914	-1.9609	33	cg14870914, cg02966453, cg01202997, cg13649886, cg19831147, cg26095210, cg22753918, cg22334559, cg03100040, cg06911873, cg16540393, cg18583246, cg27553501, cg07056149
DAB1	5.54557e-07	0.000327021	0.659444	-0.356264	-1.96025	144	cg08628153, cg07026918, cg11849122, cg00026909, cg15423773, cg00763223, cg05092478, cg08123701, cg01682287, cg15273111, cg18174779, cg09818265, cg23344761, cg20269267, cg17461600, cg23710611, cg03124710, cg00944580, cg12480034, cg02774129, cg07268227, cg21177673, cg19571285, cg17225340, cg17502213, cg02760152, cg11426193, cg01163362, cg25346709, cg20292791, cg13067432, cg00344270, cg25268621, cg0…
FGF19	0.00232452	0.044743	0.431708	-0.58905	-1.95987	17	cg20780721, cg26096837, cg24454109, cg27139491, cg15774153, cg26928125, cg06578825, cg18210732
SMC3	0.0024401	0.0457902	0.431708	-0.644773	-1.95966	12	cg00872628, cg16285240, cg06470552, cg15619745, cg11977348, cg07019712, cg25605792, cg03464502, cg00469508, cg03661616, cg24807448
RAB32	0.00238954	0.0454742	0.431708	-0.53827	-1.95958	21	cg26252281, cg03325733, cg23267550, cg23833452, cg15056556, cg25634742, cg01851450, cg01915609, cg14889768, cg13046801, cg22030890, cg20837557
AMOT	0.00154831	0.0357669	0.45506	-0.52037	-1.9588	25	cg10028049, cg09912589, cg05177782, cg03615197, cg17380767, cg15670241, cg23955970, cg02583883, cg13912400, cg25866412
NLRP14	0.00154831	0.0357669	0.45506	-0.52028	-1.95846	25	cg20883730, cg22235417, cg22867063, cg22443982, cg21873011, cg09371047, cg14948785, cg17228942, cg04346415, cg08757348, cg15125684, cg11679142, cg11838299, cg06200514, cg00355992
ALCAM	0.0023811	0.0454276	0.431708	-0.574951	-1.95816	18	cg09222287, cg21945842, cg17550268, cg18239337, cg08454485, cg24173411, cg09684136, cg02866870, cg18756498, cg11531198, cg08519233
GAD1	0.00115038	0.0304577	0.45506	-0.491116	-1.95754	30	cg02510467, cg15306595, cg03448612, cg09742688, cg11266473, cg23221504, cg03443455, cg11281641, cg24202654, cg01763173, cg15993538, cg03498913, cg09392443, cg25264004
C1orf58	0.00235703	0.0452792	0.431708	-0.588185	-1.95699	17	cg03395198, cg07031916, cg11177955, cg16307860, cg23734759, cg15559578, cg12700102, cg09820183, cg17160590
TXNDC17	0.0023811	0.0454276	0.431708	-0.574598	-1.95695	18	cg09605893, cg10175688, cg22344047, cg06465080, cg26723560, cg04181614, cg21337984, cg07322755, cg10041810, cg24419101
ATR	0.00249652	0.0465348	0.431708	-0.643865	-1.9569	12	cg20032934, cg00969988, cg20636078, cg00950962, cg24856922, cg24631870, cg15480357, cg17945282, cg16031872
SLC39A9	0.00115038	0.0304577	0.45506	-0.49091	-1.95672	30	cg04855791, cg05195393, cg12006217, cg03328886, cg04310006, cg04509559, cg13665174, cg03885708, cg15358052, cg26931528, cg22294715, cg16322149, cg17926678, cg15843009, cg11633209
CHRDL1	0.00241349	0.0456429	0.431708	-0.574461	-1.95649	18	cg00619443, cg07051329, cg25903474, cg23245147, cg20620716, cg16637019, cg16140952, cg09895223, cg23914031, cg23476456, cg19777864, cg12485020
NXPH1	0.00245456	0.0459728	0.431708	-0.587151	-1.95355	17	cg00948897, cg24785946, cg25273039, cg06444755, cg27293631, cg08723739, cg07462540, cg22339356, cg07934780
GPR83	0.00258115	0.0470751	0.431708	-0.642358	-1.95232	12	cg07586272, cg27634151, cg05374654, cg12226717, cg22638597, cg23739994
SNCA	0.00119039	0.0311778	0.45506	-0.489726	-1.952	30	cg20776829, cg11512365, cg06848047, cg08767460, cg23396644, cg00119181, cg17045024, cg18258770, cg04957214, cg01035160, cg10731794, cg20003494, cg12030690, cg15452573, cg10208370, cg01966878
DNAJC10	0.00248707	0.0464656	0.431708	-0.586665	-1.95194	17	cg05489902, cg26847229, cg25410181, cg18799908, cg01470637, cg13137476
NCRNA00171	0.00173906	0.0374361	0.45506	-0.516364	-1.95107	26	cg21759797, cg01382504, cg18832902, cg07735885, cg23694520, cg23223756, cg17994050, cg06155771, cg07468289, cg10680836, cg27023654, cg07481734
PSMA2	0.00258115	0.0470751	0.431708	-0.641769	-1.95053	12	cg15036284, cg16337783, cg21922419, cg16940617, cg00365680, cg26930615, cg17963456, cg15251939
GSC	0.00258115	0.0470751	0.431708	-0.641635	-1.95012	12	cg01695643, cg26582051, cg23655107, cg19224837, cg23636606
NBEAL2	0.00260936	0.0472794	0.431708	-0.641575	-1.94994	12	cg02670466, cg20674725, cg26699901, cg14140830
RNF167	0.00267266	0.0478913	0.431708	-0.572534	-1.94992	18	cg05072554, cg24205792, cg14624505, cg15254632, cg01035812, cg19288723, cg27658640, cg09027639, cg23220695
OLFM1	0.00238818	0.0454742	0.431708	-0.546222	-1.94906	20	cg04449479, cg00672359, cg21222830, cg23880816, cg03462051, cg27018849, cg27286999, cg04857380, cg08268099, cg11163997
ZEB2	0.000510207	0.0193107	0.477271	-0.475068	-1.94887	35	cg14388092, cg01497214, cg20177310, cg19190728, cg14022841, cg22960357, cg03424727, cg23267345, cg09670616, cg15120754, cg07246225, cg19123296, cg17751438, cg11540007, cg26522240, cg14421309, cg13511862, cg23639412
CHCHD4	0.00255209	0.046995	0.431708	-0.535326	-1.94886	21	cg16463573, cg14375111, cg00003173, cg10298173, cg14919823, cg00661202, cg13906045, cg21666675, cg27109131, cg02711527
FPGT	0.00260936	0.0472794	0.431708	-0.640979	-1.94813	12	cg04835163, cg06366937, cg21446242, cg23364470, cg23752735, cg16356856
TFAP2C	0.00263757	0.0475691	0.431708	-0.64057	-1.94689	12	cg18398846, cg19694200, cg09183753, cg03201044, cg15536490, cg12521353, cg11482571, cg05013064
ESYT3	0.0027504	0.0487014	0.431708	-0.640113	-1.94549	12	cg11885357, cg09373148, cg26258273, cg12616277
DIO3	0.00145769	0.0348914	0.45506	-0.482906	-1.94451	31	cg08667244, cg07193553, cg01044961, cg16781205, cg18301891, cg03721993, cg15341124, cg04623955, cg00741900, cg21174533, cg02287710, cg01693026, cg18804615, cg23354716, cg17557552, cg20560169, cg05176667, cg02609127, cg04818710, cg13126530, cg22688428, cg00328051, cg01664864, cg01085461
TMEM138	0.00193108	0.0397357	0.45506	-0.518816	-1.94079	24	cg08792797, cg04215668, cg11786302, cg08048279, cg06240542, cg20528048, cg14363636, cg06052471, cg24560288, cg17449018, cg01694177
C11orf54	0.00193108	0.0397357	0.45506	-0.518636	-1.94012	24	cg27329005, cg22427773, cg08494300, cg01988480, cg06996869, cg21339478, cg04209631, cg19185133, cg21866596, cg17021566
NBR2	0.00274715	0.0486882	0.431708	-0.583015	-1.93979	17	cg15419295, cg16630982, cg20187250, cg21253966, cg16963062, cg08386886, cg19088651, cg24806953, cg17301289, cg08993267, cg20760063
CHN1	0.00277967	0.0491301	0.431708	-0.53237	-1.9381	21	cg18433728, cg09456216, cg23003258, cg13067306, cg18661246, cg00939301, cg21361856, cg23576695, cg20070631, cg16992637, cg07504288, cg18440474, cg16813053
CPSF2	0.00274715	0.0486882	0.431708	-0.582496	-1.93807	17	cg12502025, cg10324096, cg20071523, cg16204238, cg13970204, cg25946256, cg18621361, cg16925126, cg06948630, cg05007375, cg15456551
WFDC3	0.00281218	0.0495356	0.431708	-0.531849	-1.93621	21	cg17178646, cg14780681, cg26540123, cg23252815, cg04940435, cg19743869, cg10662479, cg15344410, cg25769883, cg24799514, cg07085497, cg22655324, cg17240987, cg00946582
ZNF213	0.00277967	0.0491301	0.431708	-0.58186	-1.93595	17	cg19703826, cg06910254, cg01960789, cg10256349, cg26702001, cg06218932, cg03875787, cg01449415, cg03955409
MIR934	0.00032222	0.0149337	0.498493	-0.900881	-1.93535	5	cg07911140, cg15380873, cg06268905, cg00583858
MYL12B	0.00166736	0.0368168	0.45506	-0.530198	-1.93527	22	cg19974477, cg19222379, cg20356664, cg19146448, cg09079495, cg21226485, cg06860460, cg14462626, cg16244494, cg00760847, cg09856359, cg13014058
NDUFC1	0.00270873	0.0482583	0.431708	-0.541564	-1.93244	20	cg25444551, cg24726122, cg08980109, cg25491088, cg06351786, cg02358689, cg03316672, cg15010390, cg22706166, cg08477205, cg07830416
SHPK	0.0023811	0.0454276	0.431708	-0.553705	-1.92775	19	cg12950012, cg14335564, cg11338666, cg17745562, cg13664195, cg16171867, cg12419451, cg26289012, cg25371182, cg17199681, cg07571582, cg09904774
SSB	0.0023811	0.0454276	0.431708	-0.553693	-1.9277	19	cg10037027, cg09665488, cg12990844, cg15433843, cg00767846, cg26783666, cg20787648, cg11109510, cg27252233
EMX2	0.0028049	0.0495312	0.431708	-0.540203	-1.92758	20	cg12317601, cg25334257, cg02420850, cg03522063, cg19685479, cg00603371, cg15325373, cg16654801, cg24522083, cg17307442, cg12994147, cg01202155
PSMB8	0.00013773	0.0088165	0.518848	-0.435849	-1.92613	53	cg15451100, cg13853192, cg05629721, cg05697726, cg07456831, cg09154880, cg20848216, cg24625115, cg13603062, cg05115162, cg24767041, cg01295600, cg00777968, cg24893844, cg21322855, cg11141874, cg05693489, cg21568368, cg11706729, cg06531943, cg05545172, cg03166550, cg24326130, cg20630683, cg22007922
LOC400027	0.000406276	0.0168071	0.498493	-0.896105	-1.92509	5	cg00035453, cg22732432, cg21315021
FBXL15	0.00220571	0.0434885	0.431708	-0.487015	-1.92494	28	cg04359129, cg20601314, cg13548361, cg00857182, cg11138922, cg11015346, cg20683565, cg01085228, cg06370301, cg03511638, cg25631022, cg12837404, cg01453378, cg10982567
BAT3	0.00043913	0.0177292	0.498493	-0.437655	-1.922	52	cg01806025, cg17006042, cg17797875, cg05649229, cg03098515, cg04456228, cg16598405, cg20847496, cg19444690, cg16500605, cg09900585, cg03243497, cg25921418, cg26114655, cg07449105, cg08885659, cg03119031, cg26721619, cg20640177, cg25145715, cg14756795, cg22095584, cg04536765, cg11678773, cg17615061, cg14526732, cg10628782, cg20938572
QRICH1	0.00192738	0.0397357	0.45506	-0.525168	-1.91691	22	cg15315015, cg14847983, cg16270091, cg11376330, cg05392222, cg14533860, cg10954248, cg16526952
IFT140	0.00237883	0.0454276	0.431708	-0.52218	-1.906	22	cg27186878, cg08235889, cg07746699, cg04932804, cg10146249, cg07195197, cg02010347, cg00123094, cg16327326, cg09621938, cg10444556, cg03054303, cg08965723
IFT122	0.00242572	0.0456523	0.431708	-0.504374	-1.90577	26	cg24769670, cg08110332, cg16435858, cg04290349, cg24196008, cg19876724, cg03061024, cg04584087, cg10113393, cg02397893, cg24273718, cg18770345, cg22415463
TMEM60	0.00191062	0.0395643	0.45506	-0.47726	-1.90231	30	cg04320354, cg22318996, cg02232396, cg08726195, cg26770381, cg10322824, cg15698347, cg17677112, cg15235373, cg17126941, cg20527383
ATP5J	0.00136027	0.0332966	0.45506	-0.473813	-1.90143	32	cg01957918, cg26562424, cg17331315, cg09651630, cg07795841, cg25670690, cg06164433, cg26131381, cg15842400, cg15707568, cg25797568, cg03497482, cg00520622, cg25085950, cg12457986, cg12545570, cg12301294, cg24327803, cg21890848, cg17612569, cg16896631, cg19891733
ZBTB37	0.00250212	0.0465944	0.431708	-0.502743	-1.8996	26	cg00857660, cg19406762, cg04705273, cg06704773, cg00263210, cg17170111, cg02033606, cg07177756, cg25883402, cg03053914, cg17025683
HTR1E	0.00265665	0.0477377	0.431708	-0.519589	-1.89654	22	cg00454577, cg22141389, cg07833420, cg17790358, cg10135483, cg02928916, cg02508664, cg21286526, cg20991421, cg14774364, cg09863441, cg04278702
GRIA4	0.00225592	0.0439699	0.431708	-0.506884	-1.89616	24	cg09980522, cg06119894, cg24968203, cg00343633, cg21217024, cg00629688, cg14088478, cg19343464, cg04747226
CAST	0.000164854	0.0103153	0.518848	-0.430327	-1.89557	51	cg07690455, cg19471485, cg07507685, cg05953230, cg19779670, cg05548403, cg15820273, cg02180159, cg27067214, cg03839934, cg13012653, cg02632229, cg02587643, cg22066000, cg16136840, cg12352035, cg27588075, cg16070035, cg13924988, cg00560574, cg12451676, cg12290896, cg19933664, cg21635917, cg14097306, cg01249180, cg11214001, cg00380725, cg15919833, cg25889249
RPL26L1	0.00283463	0.0496955	0.431708	-0.544251	-1.89483	19	cg19580633, cg25406872, cg23193410, cg01418033, cg14134153, cg16662989, cg14015804, cg08669721, cg24876683, cg19523118
MYC	0.00273131	0.0484957	0.431708	-0.500551	-1.89132	26	cg03076047, cg27045396, cg01052743, cg27207274, cg17160660, cg23187103, cg15465092, cg03003858
MIR6508	0.000895403	0.0258909	0.477271	-0.879857	-1.89019	5	cg17943520, cg16299399, cg17360196, cg07495738
NRXN3	0.000754651	0.0240187	0.477271	-0.430775	-1.87782	47	cg09363586, cg09260207, cg12501171, cg13968242, cg11318790, cg04546953, cg15572745, cg22878414, cg09986710, cg08119153, cg05468833, cg16766249, cg11510620, cg17390031, cg02971654, cg01409496, cg24951376, cg14335579, cg04324727, cg04272011, cg12224393
HNRNPUL1	0.00168755	0.0370938	0.45506	-0.467407	-1.87572	32	cg06297490, cg08602075, cg03730535, cg10177748, cg17106073, cg26936188, cg12946660, cg13085065, cg23330034, cg06505394, cg25627403
MID1	0.00032067	0.0149337	0.498493	-0.426263	-1.86625	50	cg02275924, cg12071142, cg24585667, cg16902775, cg03188519, cg03259264, cg00536065, cg16692308, cg13270115, cg25710140, cg05783039, cg10426727, cg01755224, cg25016710
CDK6	0.00107761	0.029159	0.45506	-0.454327	-1.86378	35	cg16527334, cg02689293, cg04208803, cg20524301, cg07469637, cg04725669, cg21914187, cg26582784, cg14767289, cg01756060, cg09142942, cg20712426, cg14787980
TFAP2A	0.000543188	0.0201195	0.477271	-0.435025	-1.86343	44	cg14009588, cg22836400, cg25940847, cg16871519, cg11063729, cg13045959, cg20540714, cg01158822, cg03719083, cg10129408, cg21284680, cg12439899, cg16226962, cg17697633, cg26394775, cg25472998, cg27283345, cg23535596
INTS9	0.00172846	0.0373479	0.45506	-0.456838	-1.85887	33	cg27020749, cg15720343, cg23662892, cg07174911, cg14442394, cg07267296, cg04041942, cg16118564, cg11180303, cg02102810, cg05314271, cg07421858, cg26471529, cg03103158, cg22095816, cg07358015, cg14143435
ADD2	0.000808255	0.0246145	0.477271	-0.444847	-1.85834	40	cg17152854, cg14288567, cg21614115, cg22370480, cg02012731, cg01290229, cg16366965, cg23427269, cg13019856, cg15170605, cg03384579, cg22039638
HOXA11	0.00217584	0.0430304	0.431708	-0.45435	-1.85265	34	cg21447117, cg18977999, cg04822748, cg25901381, cg10657141, cg24446586, cg12810084, cg12997720, cg15760840, cg09495769, cg07116997, cg15916646, cg10767141
BDNF	7.90943e-05	0.00630355	0.538434	-0.373172	-1.8484	92	cg22128379, cg27193031, cg07159484, cg03747251, cg15710245, cg23947039, cg25381667, cg23497217, cg16257091, cg09505801, cg23619332, cg24249411, cg24377657, cg17882499, cg11865360, cg00298481, cg17413943, cg13974632, cg03984780, cg15462887, cg15688670, cg10022526, cg25412831, cg06816235, cg05218375, cg12021170, cg06025631, cg21291635, cg25328597, cg06046431, cg26949694, cg01225698, cg04481212, cg2…
BRCA1	0.00170282	0.0372386	0.45506	-0.444326	-1.84326	37	cg15419295, cg16630982, cg20187250, cg21253966, cg16963062, cg08386886, cg19088651, cg20185525, cg25067162, cg10893007, cg02286533, cg24806953, cg01587050, cg17301289, cg08993267, cg20760063, cg14048487, cg04658354, cg14947218
MCM3AP-AS1	0.00266163	0.0477377	0.431708	-0.856068	-1.83908	5	cg00453930, cg22203077, cg19045300, cg04736676
CCDC140	0.000718141	0.0231758	0.477271	-0.421219	-1.83542	46	cg14559259, cg18077971, cg06916239, cg16325502, cg16529477, cg13767755, cg14093610, cg20372045, cg23546474, cg24261911, cg19476053, cg08431536, cg14064356, cg02245378, cg13485564, cg16692317, cg15703632, cg09424526, cg03539789, cg20584905, cg00926215, cg19352038, cg20969194, cg15133719, cg08697503, cg08688313
C1orf94	0.00119872	0.0313035	0.45506	-0.431612	-1.83398	42	cg09485211, cg27019257, cg24435884, cg09596405, cg26711073, cg16787185, cg22015449, cg04486873, cg25025247, cg23704137, cg00124902, cg13080029, cg04323427, cg26226879, cg02656891, cg25772827, cg04025150, cg23442151, cg19228118, cg24558425, cg01956976, cg18328755, cg24411961, cg13329248
GLI3	0.000878354	0.0258229	0.477271	-0.442998	-1.82828	38	cg07191743, cg25846074, cg19603847, cg19208079, cg17390350, cg11366849, cg10199556, cg25726664, cg00560277, cg07104748, cg15751116, cg10950272, cg10055593, cg04131524, cg16216907
NR2F2	0.00175034	0.0374803	0.45506	-0.429369	-1.81762	41	cg20754348, cg23669287, cg08370996, cg01153166, cg09969043, cg17826834, cg15379412, cg26584653, cg01370181, cg14205663, cg21318213, cg05108467, cg16517469, cg12280054, cg04256378, cg03018496, cg02968429, cg23042706, cg05155965
CCND2	0.00272507	0.0484291	0.431708	-0.444436	-1.81222	34	cg15264083, cg05987650, cg18566594, cg05667158, cg25454116, cg00888007, cg15993083, cg15348972, cg13575161, cg17296482, cg15249639, cg08949711, cg22678952
MAD2L2	0.00242055	0.0456523	0.431708	-0.44065	-1.80842	36	cg19494645, cg08275633, cg24117376, cg21153875, cg06631863, cg08269037, cg00449251, cg00285319, cg22456539, cg01719832, cg26807643, cg25102735, cg06630737, cg02397176
MIER1	0.00105293	0.0286574	0.45506	-0.436792	-1.80266	38	cg22855438, cg19315942, cg04021663, cg22875643, cg20681437, cg02281959, cg04717579, cg19150666, cg06568431, cg17104542, cg21070498, cg25828688, cg00044354, cg15930380, cg05555975, cg21299256, cg03892937, cg17825156, cg27590792, cg08817048, cg09585255, cg07195508, cg05898729
IGF2	8.44026e-05	0.00643997	0.538434	-0.36157	-1.79395	94	cg13791131, cg17462140, cg05444816, cg25574024, cg16817891, cg26516510, cg20088847, cg08162473, cg19443075, cg24431667, cg13167664, cg20339650, cg00164727, cg24047810, cg22287492, cg06460568, cg21917949, cg08014499, cg16977706, cg05323345, cg14432744, cg13928782, cg05859777, cg10337079, cg08986368, cg21667878, cg14612568, cg17906784, cg15393937, cg15508379, cg25742037, cg18087943, cg13756879, cg1…
CDH13	0.00010759	0.00746419	0.538434	-0.364256	-1.78894	88	cg11586220, cg13419681, cg08497530, cg21843225, cg01840508, cg25671785, cg01301138, cg16278635, cg05374412, cg09532041, cg05786812, cg13069413, cg08004934, cg02753722, cg13453162, cg06386789, cg17755498, cg05949171, cg12061329, cg08747377
C6orf48	0.000669793	0.0221293	0.477271	-0.410459	-1.7866	48	cg22034155, cg06320936, cg03446203, cg02335619, cg27349795, cg12047750, cg19965099, cg14510314, cg15734516, cg17183362, cg14850580, cg09673200, cg00528568, cg17536960, cg20900994, cg02522311
ETV1	0.00193549	0.0397357	0.45506	-0.435108	-1.78494	35	cg20281632, cg10386045, cg26986937, cg07323919, cg00469341, cg13484991, cg08784464, cg01958221, cg21249126, cg20500248, cg05131488, cg03932308, cg12145787, cg22479366, cg02881625, cg09366357
ODZ4	0.000651102	0.0218164	0.477271	-0.385514	-1.74956	60	cg25783326, cg00908927, cg20480334, cg25965355, cg10144558, cg06892009, cg24810917, cg05340269, cg06562283, cg18222192, cg17146918, cg04983516, cg01149449, cg12841273, cg11987596, cg11076902, cg17579825, cg15310583, cg14762722, cg22782986, cg05473648, cg11172483, cg26977644
CHST8	0.000799921	0.0244249	0.477271	-0.38123	-1.73012	60	cg24739326, cg18252433, cg05746134, cg12103265, cg22853855, cg07981869, cg15510895, cg08135503, cg04514644, cg10579631, cg22375689, cg11351746, cg10579818, cg15688551, cg17896573, cg03125498, cg12200950, cg08989375, cg22200289, cg03770290, cg21483110, cg08400962, cg10358533, cg16190732, cg19594305, cg01444487, cg27198485
ALX4	0.002423	0.0456523	0.431708	-0.405982	-1.72802	43	cg00268840, cg00374839, cg01483681, cg26717041, cg04578774, cg15817236, cg19020830, cg13408594, cg13807496, cg16321280, cg22974228, cg15786900, cg24362098, cg07462292, cg23385200
CHRM2	0.00254669	0.046995	0.431708	-0.394034	-1.71885	49	cg13102079, cg22471517, cg00973677, cg10454514, cg24575234, cg02866106, cg25150440, cg08323651, cg07664198, cg23300659, cg24845274, cg05327864, cg23886662, cg26253500, cg04842426, cg10418044, cg16057587, cg07172149
TBL1X	0.00198065	0.0401076	0.431708	-0.376525	-1.68571	57	cg04820960, cg16936021, cg04271131, cg27434862, cg00808693, cg10018576, cg16892191, cg17064159, cg01975591, cg02171705, cg13728104, cg23508627, cg22865368, cg07689715, cg09408387, cg10782454, cg14105781, cg02810043, cg08259248, cg24529143, cg08076261
EDNRB	0.00228074	0.0442872	0.431708	-0.37649	-1.66778	54	cg18032190, cg21364111, cg18568990, cg07035515, cg19916212, cg02147695, cg23316360, cg06057566, cg13434989, cg22541679, cg12847373, cg23494140, cg19650157, cg26022015, cg01910869, cg09152886, cg19742055, cg12602112, cg21675115, cg16739796, cg04390523, cg10016380
HOXC4	0.000772895	0.0241287	0.477271	-0.293487	-1.57112	131	cg17026220, cg03923561, cg15894722, cg07779605, cg03144714, cg08465346, cg05349837, cg26035702, cg27441225, cg20435403, cg10561239, cg05982757, cg08106887, cg02017718, cg04704531, cg19892287, cg03892356, cg27002522, cg11585893, cg15834355, cg18922524, cg15817960, cg16937769, cg21703606, cg23047434, cg05416450, cg17031478, cg09878193, cg04105511, cg12232783, cg26019295, cg01524853, cg00040312, cg2…
ANKRD11	0.000177381	0.0107083	0.518848	0.35941	1.57298	232	cg07201614, cg09919524, cg01744474, cg06063149, cg01739236, cg09823077, cg00623000, cg00675737, cg24867981, cg15842189, cg06159562, cg10515125, cg08134863, cg13629304, cg23781206, cg26826216, cg26533023, cg12914530, cg06783428, cg05712873, cg02013146, cg09139097, cg06233738, cg07600669, cg16623734, cg09222577, cg02749356, cg16437021, cg05320533, cg27300957, cg03649606, cg27600435, cg27660627, cg0…
ZMIZ1	0.00283112	0.0496787	0.431708	0.393642	1.58674	103	cg16251918, cg17343196, cg16523252, cg23084416, cg02145310, cg02851873, cg06311168, cg00533891, cg10612237, cg23537141, cg01720007, cg16854826, cg07562888, cg04174354, cg17823346, cg04652333, cg16112766, cg00162361, cg17065712, cg11939940, cg12585732, cg17378114, cg10427868, cg03216879, cg09936762, cg03810913, cg22848722, cg18295744, cg16944845, cg16207001, cg16182375, cg04708661, cg20870979, cg0…
SEPT9	0.000243764	0.012691	0.518848	0.371431	1.60292	194	cg12176787, cg02277530, cg16366686, cg13342364, cg13061373, cg06791979, cg12424499, cg06909384, cg26415789, cg15096327, cg22580670, cg15229994, cg12513760, cg17922695, cg07827420, cg11000969, cg19083265, cg06584448, cg02482730, cg15293063, cg10755077, cg17697835, cg17398836, cg17053854, cg05626616, cg01330277, cg05275033, cg01944380, cg02236330, cg24136318, cg00871371, cg12817089, cg16722931, cg2…
CCNY	0.00202036	0.0406795	0.431708	0.408827	1.62472	94	cg06397711, cg20418498, cg17025291, cg13524748, cg19025193, cg22527230, cg16151503, cg02950701, cg12273505, cg05701548, cg19384681, cg10068572, cg11958675, cg15109966, cg18702026, cg20359183, cg11558515, cg19241465, cg14168246, cg13457238, cg07740894, cg16431067, cg12391815, cg02283126, cg11830857, cg11730023, cg19677952, cg04922063, cg01217608, cg02815248, cg10819163, cg14664391, cg04054187, cg0…
CBFA2T3	0.000981552	0.0276525	0.45506	0.398081	1.62855	118	cg12168623, cg16686594, cg08047086, cg04468133, cg13745346, cg10370872, cg18695143, cg05267735, cg05099708, cg26507422, cg00108108, cg26927634, cg26824780, cg08443038, cg08674255, cg00493358, cg26776806, cg09141835, cg06592860, cg08978788, cg10022702, cg00492521, cg05540133, cg04379002, cg08415156, cg27061485, cg05489661, cg08698997, cg00825967, cg23362570, cg02525435, cg01123787, cg24250919, cg1…
GNAS	0.000317386	0.0149334	0.498493	0.389429	1.64883	154	cg04779428, cg25130962, cg17071192, cg01748573, cg20213508, cg17334845, cg04677683, cg08997444, cg03264550, cg20008140, cg10748817, cg21809160, cg19296354, cg10011623, cg24276988, cg07284407, cg07909402, cg21625881, cg15725616, cg01817393, cg20782596, cg22290117, cg06693667, cg23159236, cg20018057, cg03821543, cg25983380, cg18224653, cg11244758, cg09604333, cg00267746, cg01715551, cg01538522, cg1…
TNS3	0.000903071	0.0259835	0.477271	0.421834	1.66429	91	cg24499411, cg06935531, cg13803195, cg18723295, cg18990560, cg20128809, cg02507246, cg10003974, cg11203616, cg17858880, cg06114556, cg05773702, cg15105359, cg13245817, cg07395763, cg11505784, cg26978854, cg24813021, cg01899074, cg15118922, cg23895495, cg22244334, cg01103207, cg12787411, cg04089246, cg03758710, cg04879211, cg05794556, cg21160357, cg14998086, cg21630292, cg01645496, cg26748278, cg2…
DLGAP1	0.00173025	0.0373479	0.45506	0.441954	1.67191	70	cg18101707, cg06203851, cg16390346, cg18164689, cg27602828, cg22846976, cg09092200, cg09864151, cg10386511, cg13436049, cg20123962, cg12631169, cg27318000, cg14960433, cg14181588, cg00752864, cg25358264, cg11249109, cg06809621, cg13696868, cg14153112, cg05371589, cg04098302, cg00041368, cg20384043, cg26598649, cg23756536, cg05037158, cg00520265, cg24943150, cg24595270
B3GALT4	0.00212261	0.0422352	0.431708	0.464891	1.68112	54	cg09349343, cg03127244, cg22878489, cg18729787, cg13882090, cg03721978, cg17103217, cg24605046, cg14023774, cg00052772, cg23950233, cg16090881, cg26055446, cg16226644, cg21618521, cg09080120, cg00163549, cg04263436, cg21986677, cg16396284, cg06362282, cg17416730, cg19882268, cg22322679, cg04262471, cg16580935
CTBP2	0.000227961	0.0121871	0.518848	0.410151	1.6914	122	cg06738031, cg12647283, cg07445831, cg10125451, cg06782004, cg20030560, cg07914282, cg05138702, cg06986462, cg05577920, cg04764907, cg09872760, cg02900757, cg02399019, cg10296292, cg04493700, cg21026634, cg07922827, cg27488007, cg15438130, cg03576555, cg16174644, cg22769890, cg02631583, cg19580293, cg14095797, cg23992194, cg00317852, cg06240209, cg11784626, cg09709245, cg23000734, cg01316671, cg1…
FILIP1L	0.000565736	0.0203498	0.477271	0.432275	1.69864	89	cg23221889, cg21855281, cg15055095, cg27479401, cg05273695, cg13219301, cg16347595, cg03758308, cg13790797, cg04521697, cg09957895, cg00432221, cg16443146, cg10561392, cg04016922, cg15827559, cg07472196, cg07600990, cg14394740, cg00573148, cg04569855, cg18252261, cg08857713, cg03656137, cg05906075, cg26234786, cg08883172, cg07030765, cg20760676, cg21792806, cg01932663, cg12818658, cg16318181, cg1…
KIAA0513	0.00125375	0.0320935	0.45506	0.474996	1.721	55	cg07929310, cg16141165, cg21184340, cg07005506, cg06407371, cg04967410, cg02695112, cg27466129, cg12948972, cg14110304, cg04016660, cg24148044, cg01629891, cg18313620, cg26578983, cg07308243, cg20565740, cg05105330
ACOT12	0.00243793	0.0457902	0.431708	0.815833	1.72279	6	cg17741014, cg01277506, cg21942082, cg11137578
MIR539	0.00281384	0.0495356	0.431708	0.641761	1.72942	14	cg08051194, cg18096939, cg09337069, cg14667980, cg17613498, cg19560831, cg02882979, cg01078903, cg18863119
PEX2	0.00262665	0.0474188	0.431708	0.643099	1.73303	14	cg09960596, cg22875784, cg13690605, cg26157534, cg01791597, cg26702290, cg18188756, cg03179020
LIMA1	0.00139312	0.0339148	0.45506	0.502748	1.73398	41	cg16289723, cg24245830, cg02400760, cg06817772, cg00718418, cg24489161, cg12892471, cg10831560, cg10319545, cg06556439, cg06399901, cg09920043, cg20289898, cg14394091, cg15819890, cg16030540, cg17046586
C20orf54	0.00267529	0.0478943	0.431708	0.755242	1.73505	8	cg23289456, cg01479232, cg04972979, cg10339152, cg19145218, cg20119532
MIR211	0.00177477	0.037663	0.45506	0.87219	1.73823	5	cg01684389, cg08096702, cg13905606, cg20260028
SYNE2	0.00114456	0.0303863	0.45506	0.491318	1.73843	48	cg26897514, cg21647636, cg18901581, cg07101560, cg00579734, cg00851532, cg06653974, cg21147364, cg16778211, cg23250157, cg02464912, cg19913123, cg08238265, cg10204058, cg05915593, cg19987354, cg17309380, cg21055933, cg27088639, cg25056332, cg11479220, cg21615907, cg12353867
NCOR2	0.000551178	0.0202376	0.477271	0.460238	1.7414	69	cg17282981, cg01054110, cg22580512, cg25449924, cg18221226, cg06242243, cg11639950, cg19184362, cg13830110, cg01366470, cg20494738, cg13416396, cg22820108, cg08192337, cg17543324, cg24913871, cg01936957, cg16350126, cg14256268, cg08988859, cg22828383, cg26406891, cg23237987, cg18906815, cg11607710, cg07747189, cg06955420, cg03448733, cg05948411, cg24011399, cg26581206, cg06410888, cg09825309, cg2…
UBOX5-AS1	0.00155871	0.0357669	0.45506	0.874259	1.74236	5	cg14171928, cg21533389, cg26245366, cg21442356
CD1A	0.00155871	0.0357669	0.45506	0.874474	1.74279	5	cg03718242, cg19355763
LAMTOR1	0.00163029	0.036477	0.45506	0.827504	1.74743	6	cg15573884, cg11861591, cg09569107
RNASE10	0.0022461	0.0438846	0.431708	0.761726	1.74995	8	cg23244376, cg00478884, cg23260578, cg21931174
TMCC1	0.00163078	0.036477	0.45506	0.539468	1.75336	30	cg03704024, cg01630688, cg13682735, cg05679002, cg25392340, cg02007809, cg09610578, cg16224832, cg02772190, cg19405504, cg15489422, cg12062611, cg01574040, cg21775245, cg19272592, cg03541853, cg25703937
GTSF1	0.00240879	0.0455983	0.431708	0.682094	1.75469	12	cg20451566, cg20576002, cg04450876, cg07875328, cg06809675, cg03758367, cg04042279, cg18211706
COX7A1	0.00237355	0.0454276	0.431708	0.742266	1.76026	9	cg21695771, cg24929925, cg12942894, cg24335895, cg15176213, cg01990874, cg24516964, cg01102311
RGS13	0.00221827	0.0435763	0.431708	0.684835	1.76174	12	cg19984039, cg17365629, cg25966829, cg10298896, cg05023691, cg04229820, cg24679007, cg21089125
SCARF1	0.00187414	0.0391137	0.45506	0.767695	1.76366	8	cg13327929, cg08130663, cg11998307
BTBD17	0.00170247	0.0372386	0.45506	0.770371	1.76981	8	cg00230074, cg12443604, cg10866062, cg00898111, cg11541486, cg08084655, cg07819011
ZNF559-ZNF177	0.00205496	0.0410992	0.431708	0.688282	1.7706	12	cg25338308, cg06224278, cg16277399, cg04085696, cg00084205, cg07085900, cg23470478, cg22176473, cg22265293
ASB16	0.00200839	0.0405428	0.431708	0.746646	1.77064	9	cg22998028, cg21038703, cg10023613, cg04520793, cg16988970, cg14455421
LRG1	0.000945084	0.0268879	0.477271	0.839106	1.77193	6	cg22375763, cg11502375, cg17272620, cg11829879
CD47	0.00197331	0.0400423	0.431708	0.689884	1.77472	12	cg06806080, cg25881170, cg09643587, cg02487233, cg17216759, cg11741004, cg16637917, cg09273969, cg00492070
CXCL17	0.00155941	0.0357669	0.45506	0.772944	1.77572	8	cg15937958, cg14799008, cg22276896, cg02831955, cg14601613, cg16512640
GOPC	0.00172	0.0373479	0.45506	0.659217	1.77646	14	cg09108191, cg25175215, cg11662098, cg22575681, cg06104144, cg23172864, cg24234850
COMTD1	0.00261439	0.0473266	0.431708	0.731302	1.77998	10	cg04944931, cg16004814, cg02271943, cg06113708, cg00478333
AKR1C3	0.000751607	0.0239775	0.477271	0.843134	1.78044	6	cg10986817, cg07665352, cg26820473, cg21680227
MXRA8	0.00231612	0.0446984	0.431708	0.59522	1.78059	21	cg05572157, cg18534079, cg17132079, cg18550476, cg03397519, cg00970622, cg24356704, cg23036947, cg13393580, cg22273474, cg27399052, cg23973885
C1orf162	0.00247459	0.0463033	0.431708	0.732866	1.78378	10	cg10345494, cg10861596, cg23068939, cg08468422, cg16540981, cg07329259
MIR130B	0.00244662	0.0458683	0.431708	0.733404	1.78509	10	cg04282607, cg16244770, cg16974014, cg02473781, cg11673244, cg03636163
SEMA3B	0.00240081	0.0454916	0.431708	0.567941	1.78571	25	cg22927302, cg02490920, cg12999941, cg06192381, cg11039694, cg17190441, cg12577320, cg13209298, cg12479660, cg09034667, cg20116935, cg25647415, cg22229016, cg25597623, cg19655486, cg02657721
TNNI2	0.00148	0.0350387	0.45506	0.66332	1.78752	14	cg26072173, cg22327778, cg15662902, cg20660011, cg18386828, cg14672680
STRA6	0.000782639	0.0242299	0.477271	0.544508	1.789	32	cg23887948, cg01332054, cg17516330, cg18640660, cg06062102, cg06973218, cg13888509, cg02051878, cg22672067, cg00316939, cg23719157, cg03030071, cg09153267, cg11787522, cg09682679, cg08978227, cg21068293, cg14275207, cg24186440, cg15858994, cg18717554, cg14686792, cg21631918, cg15162876
PRR23B	0.00158706	0.036051	0.45506	0.754688	1.78971	9	cg16359799, cg00662963, cg14928617, cg26115216, cg23330451, cg22926528, cg02045971
TCEA2	0.000588297	0.0207601	0.477271	0.518985	1.78998	41	cg00636737, cg04956806, cg10494860, cg27370028, cg03946671, cg24348495, cg00237512, cg05031898, cg27598208, cg15929202, cg21381421, cg02197387, cg17368917, cg12176783, cg19242268, cg22243423, cg04171166, cg24700051, cg05270606
KRTAP15-1	0.000603508	0.0209873	0.477271	0.847824	1.79034	6	cg21777304, cg22337977, cg24706647, cg01149537
INHA	0.0016467	0.036539	0.45506	0.695966	1.79037	12	cg08493959, cg00036871, cg22065526, cg19780389, cg10157183
KRT80	0.00155897	0.0357669	0.45506	0.755567	1.7918	9	cg00280812, cg04472592, cg20225745, cg22351187, cg03747456
SORT1	0.00281904	0.0495356	0.431708	0.60457	1.79193	20	cg12464626, cg23616212, cg23032129, cg15309741, cg02175308, cg16988986, cg09764697, cg06387602, cg14621698, cg01526259, cg02192749, cg13926338
SNORD37	0.00213905	0.0425189	0.431708	0.737318	1.79462	10	cg10340117, cg03692782, cg27168033, cg20738733, cg08844770, cg06951383
OSBPL6	0.000553521	0.0202732	0.477271	0.520689	1.79586	41	cg15501346, cg27365261, cg22869011, cg10448915, cg00156026, cg03115493, cg19151455, cg26320010, cg17640626, cg14807892, cg16136187, cg04461800, cg27332830, cg03915558, cg10917899, cg23945081, cg26949612, cg25219515, cg17289076
BRD1	0.00223887	0.0438846	0.431708	0.682394	1.79691	13	cg14159509, cg25943702, cg06057569, cg16001335, cg20400518, cg25467224, cg21032013
GRB10	0.000116259	0.00785556	0.538434	0.449352	1.79883	98	cg00224523, cg03013699, cg08835688, cg01238073, cg25829805, cg22821931, cg13311902, cg03104936, cg13338445, cg10289927, cg19381814, cg25472458, cg07519654, cg00228281, cg23120299, cg25674763, cg16349612, cg22812151, cg02468316, cg15565231, cg04223026, cg24864397, cg12999836, cg01177190, cg17819489, cg07338713, cg12903171, cg23742152, cg07398810, cg11867552, cg25748357, cg16826856, cg05998930, cg1…
PPT2	0.000417521	0.0170693	0.498493	0.497642	1.79955	54	cg17329164, cg18049167, cg12883279, cg17161421, cg13102294, cg04749507, cg16481280, cg12738718, cg10551329, cg06025456, cg01111041, cg02956248, cg06108383, cg00552704, cg23359665, cg05133205, cg06264679, cg11386011, cg13934406, cg14130039, cg12626589, cg08509237, cg00933538, cg21037008, cg20914572, cg17113856, cg23470939, cg04105091, cg19048176
C3orf20	0.00130681	0.0326452	0.45506	0.699858	1.80038	12	cg05029780, cg20830699, cg14432477, cg08692541, cg20393669, cg09491709
LOC390594	0.00257081	0.0470751	0.431708	0.813117	1.80326	7	cg10619342, cg23058194, cg06674527, cg18376860, cg01569660
PRRT1	0.000789735	0.0242639	0.477271	0.553533	1.80779	31	cg12883279, cg17161421, cg04749507, cg16481280, cg12738718, cg10551329, cg06025456, cg01111041, cg02956248, cg06108383, cg23359665, cg11386011, cg13934406, cg12626589, cg21037008, cg20914572, cg17113856
PIWIL3	0.00260124	0.0472794	0.431708	0.615513	1.80962	19	cg20320128, cg19529709, cg07971797, cg05312960, cg15256783, cg09900586, cg04583163, cg22897224, cg23638640, cg19198924, cg02028568
GIPC2	0.0017504	0.0374803	0.45506	0.687504	1.81037	13	cg09662920, cg09826056, cg01074657, cg19766489, cg09107315, cg20785560, cg00406225, cg21497935, cg00347563, cg25288420
KLHDC5	0.00197641	0.0400634	0.431708	0.816691	1.81118	7	cg10538146, cg21962611, cg08742424, cg10893683
OLA1	0.00260124	0.0472794	0.431708	0.616336	1.81204	19	cg27310255, cg20124547, cg11214594, cg19925801, cg20635266, cg09385801, cg19788136, cg18390683, cg02895802, cg06068625, cg08826760
FRK	0.000790107	0.0242639	0.477271	0.789465	1.81367	8	cg15226275, cg23286972, cg09563657, cg26557270, cg18764771
MIR487B	0.00270494	0.0482583	0.431708	0.720437	1.81384	11	cg10177827, cg14667980, cg17613498, cg19560831, cg02882979, cg01078903, cg18863119
TCTEX1D4	0.00156044	0.0357669	0.45506	0.689407	1.81538	13	cg26274118, cg04625834, cg09400475, cg12492197, cg09292826, cg07937270
CCL25	0.00125082	0.0320935	0.45506	0.765723	1.81588	9	cg15436354, cg11245297, cg21743830, cg21833338, cg20327591
DCN	0.00126091	0.032159	0.45506	0.597053	1.81632	22	cg15132385, cg07648851, cg21298703, cg21226087, cg02322911, cg27610709, cg04018214, cg17736331, cg15569988, cg04088433, cg26521708, cg09471817, cg12762596
C19orf77	0.00185753	0.0389024	0.45506	0.819679	1.81781	7	cg22105158, cg18795569, cg15148078, cg06666376, cg03107987
PIK3C2G	0.000882309	0.0258679	0.477271	0.674795	1.81844	14	cg26156648, cg20944970, cg23024242, cg14290427, cg19539278, cg20429242, cg13657185, cg02620935, cg16260786, cg27156917
NKX6-3	0.00101324	0.0279681	0.45506	0.770945	1.82827	9	cg18227471, cg25883020, cg04624413, cg11952839, cg00448191, cg22282038, cg18256894, cg01768960
TRAF1	0.0021912	0.0432901	0.431708	0.622066	1.82889	19	cg00725213, cg21241889, cg21152671, cg15551881, cg16689534
LEP	0.00122877	0.0317486	0.45506	0.611482	1.82924	21	cg03084214, cg23753947, cg14734794, cg05136031, cg19594666, cg26814075, cg00666422, cg19788638, cg20564991, cg11005360, cg13381984, cg16683741, cg12782180, cg12083122
LOC144571	0.00101324	0.0279681	0.45506	0.771439	1.82944	9	cg20380214, cg02883147, cg04155231, cg26114124, cg13575925, cg10605084
SLC27A2	0.00128946	0.0324544	0.45506	0.695293	1.83088	13	cg25417405, cg24717159, cg00616172, cg02365220, cg03782694, cg25150243, cg15660094, cg02726943
CNGA1	0.00175553	0.0375005	0.45506	0.632215	1.83215	18	cg16187121, cg17509061, cg18961787, cg02339197, cg02804895, cg03825843, cg22322620, cg00418859, cg24093715, cg24494102
PDLIM5	0.000545208	0.0201195	0.477271	0.519226	1.83254	47	cg17037091, cg25398032, cg27004481, cg15537731, cg17312424, cg21482885, cg22244815, cg18224734, cg06683978, cg12486630, cg09867705, cg16968297, cg02383173, cg14881910, cg11427848, cg02529459, cg16934360, cg15468403, cg15313339, cg12091254, cg04772620, cg21997435, cg02586348
LRRC14B	0.00175555	0.0375005	0.45506	0.667854	1.83282	15	cg24814621, cg03553576, cg01239922, cg13787932, cg19858576, cg12711961, cg24696500, cg15351009, cg00607051, cg19091930, cg18443893, cg05760882
WIPI2	0.000545138	0.0201195	0.477271	0.564805	1.8357	30	cg02876211, cg16497323, cg25259798, cg19925809, cg04560347, cg25397886, cg20592700, cg16236639, cg00318788, cg12927293, cg27508148, cg01683969, cg24555360, cg03314875, cg19512887
CLDN9	0.00215493	0.0427743	0.431708	0.651559	1.83726	16	cg10282491, cg15335089, cg10594179, cg27583220, cg16837379, cg04715503, cg09674170, cg27009812, cg06117341, cg03038672, cg06489965, cg08199758, cg01519584, cg05485462
CGA	0.000577269	0.0206501	0.477271	0.799996	1.83787	8	cg13753006, cg07981495, cg18899818, cg23389079, cg25622655, cg27011416, cg12078738
ENTPD2	0.000193428	0.0111753	0.518848	0.870714	1.83868	6	cg14044120, cg14295062, cg25483003
NARR	0.00102254	0.028053	0.45506	0.755813	1.83964	10	cg06756709, cg27547165, cg02098463, cg22833124
ASB15	0.00257204	0.0470751	0.431708	0.642606	1.8399	17	cg07642729, cg04727614, cg27181727, cg23809103, cg13643794, cg05491902, cg25014533, cg07068054, cg18369564, cg22137273
TRIP12	0.000482743	0.0189018	0.498493	0.536998	1.84158	39	cg22190754, cg14285250, cg05111073, cg17823328, cg20727933, cg21738675, cg21190617, cg23594249, cg06532879, cg10388975, cg03488056, cg00898279
MOS	0.00190857	0.0395643	0.45506	0.731741	1.8423	11	cg05661838, cg27002178, cg11716789, cg00480264, cg00636390, cg22130262, cg00931742
TNF	0.00252086	0.046631	0.431708	0.643465	1.84236	17	cg10650821, cg01569083, cg19648923, cg08553327, cg11484872, cg21370522, cg26729380, cg03037030, cg04425624, cg21222743, cg12681001
FERMT1	0.00159716	0.0361403	0.45506	0.671382	1.84251	15	cg25325723, cg09539538, cg15692360, cg07718903, cg26758396, cg02182074
ZBTB20	3.80229e-06	0.00117448	0.627257	0.440891	1.8429	143	cg01389234, cg19981243, cg13055436, cg13484596, cg22367727, cg05522408, cg19013174, cg00570881, cg22695318, cg24146776, cg26042546, cg08996334, cg13792714, cg09484322, cg13108609, cg14654134, cg25735593, cg01879525, cg08135136, cg25973835, cg02564299, cg15677954, cg21316960, cg14847818, cg17875356, cg23093175, cg22612330, cg10501306, cg05785919, cg20349650, cg02331784, cg27273791, cg16127691, cg2…
COX7B2	0.00127964	0.032364	0.45506	0.586296	1.84342	25	cg18618789, cg25463409, cg21053474, cg27299949, cg17121772, cg10910685, cg10651502, cg24117354, cg12018494, cg11085283, cg21472835, cg24831862, cg12403328, cg03628457, cg17634390, cg07471018
SCAPER	0.00249526	0.0465348	0.431708	0.644248	1.8446	17	cg18112451, cg20108671, cg09425604, cg05061763, cg19289870, cg08234411, cg05895507, cg26685313, cg21673338, cg22578048, cg22233170, cg11789146, cg15234346, cg00891396, cg26804004, cg23625390
LOC646627	0.000563103	0.0203498	0.477271	0.802942	1.84464	8	cg19519737, cg01878406, cg10402995, cg04162032, cg16824319, cg03541887, cg04024799, cg23230830
OMG	0.000541854	0.0201195	0.477271	0.803555	1.84604	8	cg24425628, cg10872095, cg22915752, cg17041755, cg17487957, cg13772849, cg18232597
NPAS3	0.000966888	0.0273086	0.477271	0.758857	1.84704	10	cg15477096, cg10727171, cg05326274, cg11787167
ZBTB38	8.0657e-05	0.00630355	0.538434	0.481221	1.84713	74	cg04011423, cg08360599, cg06820102, cg20543978, cg13544811, cg25395158, cg02004979, cg21474062, cg18952015, cg04352534, cg07963147, cg13029400, cg27242726, cg20210641, cg14500070, cg00527195, cg21370924, cg18523689, cg05746809, cg23967605, cg08171890, cg01879779, cg11091779, cg13411656, cg03848978, cg09822863, cg11421029, cg19418346, cg12265439, cg09025210, cg15257376, cg01879723, cg03943459, cg1…
ABCB5	0.00241849	0.0456523	0.431708	0.645227	1.84741	17	cg21202529, cg06281721, cg08888968, cg03770549, cg18150800, cg22066521, cg01028458, cg23626475, cg21643191, cg14878128, cg08486595
PLA2G4D	0.000845531	0.0252635	0.477271	0.779245	1.84795	9	cg07774177, cg15021670, cg18063853, cg22600443, cg00934746
OTUD5	0.0008641	0.0255165	0.477271	0.593643	1.84868	24	cg02480419, cg03831206, cg02573613, cg18780401, cg07750402, cg12591117, cg18112782, cg27277239, cg12298823, cg00680673, cg13574945, cg26201401, cg14006678, cg09985072, cg03711046, cg08221357, cg15925199, cg21206285
AIRE	0.00117161	0.0308519	0.45506	0.623935	1.84933	20	cg09510531, cg16501323, cg11923631, cg01323542, cg27251412, cg08089567, cg17356252, cg18689454, cg15838223, cg16717549, cg12555955, cg15955655, cg23272544, cg03146797, cg04878385
PODNL1	0.00149925	0.0352539	0.45506	0.638529	1.85045	18	cg10729062, cg11172565, cg19921355, cg10760452, cg11509100, cg11453058, cg26650007, cg07425555, cg25264101, cg10609371, cg07336299, cg26969888
PRSS22	0.00174381	0.0374803	0.45506	0.735131	1.85084	11	cg00699901, cg21996072, cg27620871, cg21452411, cg19328294, cg00931514, cg05895034, cg05490519, cg10620012, cg09745688
SLC26A8	0.00100592	0.0278849	0.45506	0.702946	1.85103	13	cg03409668, cg19374743, cg25123266, cg15782984, cg23807646, cg00770599, cg19271626, cg20132791, cg25907322
RAD54L2	0.000992416	0.0276682	0.45506	0.703286	1.85193	13	cg18422423, cg03184357, cg18017827, cg11095658, cg04903693, cg08030373, cg26875765, cg16897579, cg05101231
LOC387646	9.93017e-05	0.00718368	0.538434	0.931333	1.8561	5	cg15469871, cg16023943, cg03848129
MUC12	0.000716476	0.0231605	0.477271	0.764059	1.85971	10	cg03982074, cg20688289, cg00841151, cg26802830, cg25797164, cg03455418, cg09313831, cg20238355
HSF5	0.00138681	0.0338612	0.45506	0.738919	1.86038	11	cg08357436, cg00878163, cg00545916, cg27366766, cg25997426
ECEL1	0.000629983	0.0214222	0.477271	0.723973	1.86242	12	cg07503630, cg09736968, cg02932167, cg12559056, cg05402424, cg03422579
UMAD1	0.000645722	0.0217417	0.477271	0.550723	1.86393	36	cg25422938, cg26322315, cg12846407, cg01553030, cg00828140, cg07628784, cg02372595, cg26965464, cg22069979, cg10420602, cg10309059, cg15943966, cg04884114, cg10295469, cg25056280, cg15198098, cg13303686, cg06211566
ARAP3	0.00074938	0.0239775	0.477271	0.708815	1.86649	13	cg11136562, cg27040005, cg02333670, cg15043642, cg13310554, cg00069642
NPEPL1	0.000498397	0.0192437	0.477271	0.692707	1.86671	14	cg00406338, cg21962374, cg27274542, cg00905309, cg20022869, cg20198384, cg26460720, cg16106179, cg17575833, cg20742175, cg16153071, cg01371631
PPP1R3F	0.00182987	0.0385906	0.45506	0.652108	1.86711	17	cg02882301, cg16403901, cg16261146, cg15620469, cg13744306, cg12704708, cg21905818, cg06025043, cg14051366, cg10723556, cg05223760, cg02156782
PIK3CD	5.22384e-05	0.00510834	0.557332	0.511082	1.86896	57	cg13297177, cg05605414, cg08201721, cg16417977, cg20994801, cg03653801, cg24859236, cg20880254, cg11873211, cg16037569, cg11980800, cg23251761, cg13457410, cg05300241, cg15590006, cg04162034, cg26819945, cg20546648, cg07427436, cg07793148
C22orf15	0.000636401	0.0215755	0.477271	0.843247	1.87008	7	cg02923302, cg07048516, cg09052401, cg04714688, cg07187268
P2RY6	0.000294016	0.0143039	0.498493	0.530039	1.87071	47	cg01743077, cg26343510, cg15745401, cg06637774, cg25137204, cg03622371, cg17373839, cg18214402, cg09379935, cg22881680, cg24104456, cg25692460, cg27590469, cg06714324, cg26501777, cg02830616, cg16886719, cg02319094, cg16008990, cg04401674, cg04099543, cg00277342, cg07726664
PRR23A	0.000695372	0.0226287	0.477271	0.710459	1.87082	13	cg02806645, cg01926813, cg21098437, cg24872425, cg03772909, cg00172799, cg06322988, cg04085942, cg07452777
NCR1	0.000621686	0.0212246	0.477271	0.843876	1.87147	7	cg13518366, cg14550066, cg18832619, cg17804112, cg25429875, cg12123879, cg11356156
FSCN2	0.00068187	0.0223387	0.477271	0.710983	1.87219	13	cg13700073, cg20932150, cg16507479, cg15774065, cg13468858, cg09084279, cg18919720, cg18447174, cg00221012
C20orf24	0.000664057	0.0220521	0.477271	0.789606	1.87252	9	cg11965685, cg19562969, cg03076771, cg11316100
AVP	0.000564129	0.0203498	0.477271	0.769834	1.87376	10	cg05136169, cg02187522, cg25551168, cg04632887, cg15313891, cg16536918, cg23169111, cg23035419
AKR7L	0.000333029	0.0151778	0.498493	0.815695	1.87393	8	cg07162162, cg13935437, cg18202521, cg12798157, cg20677058, cg11376198, cg09990584, cg09045262
MIR140	0.000329505	0.0150875	0.498493	0.816185	1.87506	8	cg01735503, cg08209934, cg03549146, cg03848856, cg03417340, cg00158530
KLHDC7A	0.000813089	0.0247116	0.477271	0.632931	1.87599	20	cg01827761, cg05040210, cg20200200, cg27451581, cg24076588, cg13507429, cg15131316, cg14356550, cg03733578, cg06662140, cg20706909
NSD1	0.00157395	0.0359495	0.45506	0.655288	1.87621	17	cg04101002, cg19731612, cg18016826, cg06407284, cg18121224, cg23831626, cg08369368, cg10821304, cg24711224, cg19027636
KCP	0.000508704	0.019297	0.477271	0.729411	1.87641	12	cg07302677, cg11461236, cg09982773, cg17150663, cg16155175, cg20531550, cg17533927, cg21550295, cg14703138
AMIGO3	0.00115397	0.0305112	0.45506	0.638772	1.878	19	cg22993195, cg17969437, cg26840291, cg05493761, cg00763458, cg25090325, cg05666287, cg27508979, cg01204305, cg02943194, cg08166588, cg17321883, cg03719380
STAP2	0.000587569	0.0207601	0.477271	0.792036	1.87828	9	cg05517572, cg12229841, cg01549069, cg15797834
LRFN4	0.00058782	0.0207601	0.477271	0.714345	1.88105	13	cg11862081, cg22740006, cg15320059, cg18986090, cg11614622, cg19391515
NPFFR2	0.000503741	0.019297	0.477271	0.619339	1.88411	22	cg16304438, cg23243355, cg25476136, cg21266330, cg10698419, cg18779103, cg09516121, cg04008252, cg10545482, cg14010852, cg02192673, cg26656113, cg20289913
FBXO27	0.000894944	0.0258909	0.477271	0.749269	1.88643	11	cg16385120, cg02197293, cg19318209, cg21849790, cg08404221, cg06957349, cg24068229, cg19767709
KLRC4-KLRK1	0.000554231	0.0202732	0.477271	0.71641	1.88648	13	cg25855710, cg22792587, cg06094757, cg03128558, cg04131958, cg08449487, cg06264089, cg08041188, cg09131321, cg08936757, cg21950367, cg04531182
OR4D2	6.24755e-05	0.00560264	0.538434	0.893567	1.88694	6	cg14819820, cg24269480, cg08200621, cg22807776, cg09333392, cg10233463
PDCD1	0.000248451	0.0127776	0.498493	0.822677	1.88998	8	cg02122525, cg25890838, cg18096388
RBPJL	0.000427852	0.0174184	0.498493	0.735026	1.89085	12	cg08654443, cg14921939, cg14915878, cg15243856, cg22809920, cg27227742, cg21835643, cg16837441, cg07534843
CHRND	0.000771977	0.0241287	0.477271	0.751898	1.89305	11	cg22276371, cg09988676, cg11641416, cg06854311, cg05875017, cg20371266
ATP1A4	0.000303809	0.0144905	0.498493	0.703427	1.8956	14	cg00084271, cg09046080, cg03300353, cg07622944, cg08279665, cg22546158, cg24618742, cg06332601, cg16289896
SLC39A4	0.000557444	0.0203061	0.477271	0.640116	1.89728	20	cg23809082, cg09155025, cg16893024, cg05763556, cg22088683, cg12676500, cg07933378, cg21788897, cg20259557, cg03453890, cg00065570, cg06368857, cg11800672
OR3A2	4.15211e-05	0.00443956	0.557332	0.90018	1.9009	6	cg20109495, cg02175443, cg02176715, cg06841902
MAPK8	0.000465652	0.0184554	0.498493	0.635606	1.90141	21	cg24023352, cg24837179, cg03689586, cg09319838, cg15442244, cg04917730, cg05887968, cg18174089, cg16760512, cg00321603, cg18932526
SLC12A4	0.000390738	0.0165299	0.498493	0.562225	1.90286	36	cg05261851, cg08500818, cg09117114, cg08039193, cg08958168, cg26416227, cg26912222, cg19899008, cg06803257, cg04539111, cg27539214, cg11024963
ZNF280D	0.000643936	0.0217417	0.477271	0.658856	1.90935	18	cg18227854, cg11085062, cg27086690, cg12957265, cg15182936, cg15596971, cg23894291, cg09190051, cg23481905, cg09524481
INF2	0.000123936	0.00825664	0.518848	0.581523	1.91062	32	cg14058736, cg16004738, cg13590876, cg04871068, cg02092616, cg04573078, cg13578465, cg23998240, cg10797387, cg07155724, cg16147932
PTCHD3	0.000303387	0.0144905	0.498493	0.742793	1.91083	12	cg02933909, cg02402587, cg13458005, cg15283904, cg00632657, cg14174317, cg10601816, cg12508651, cg00650361
HORMAD2	0.000744906	0.0239206	0.477271	0.668205	1.9132	17	cg19528371, cg18609096, cg13936783, cg22681084, cg04046669, cg21890667, cg21843594, cg16686158, cg23268208, cg10195901, cg14509403, cg15209808, cg17632937, cg01141459
PPP2R2D	0.000423018	0.0172577	0.498493	0.590898	1.9144	29	cg12010638, cg22406941, cg22851378, cg17565051, cg26381263, cg04021127, cg06259557, cg15825889, cg21750602, cg20294155, cg13985270, cg03332810, cg23941394, cg15093399, cg01750938, cg04090697, cg26621292, cg16149455, cg18821895, cg10027225, cg13257878
CYTL1	0.000608424	0.0209873	0.477271	0.760413	1.91449	11	cg01114088, cg00442112, cg04887807, cg13255282, cg03199564, cg17563034
PRH1	1.77402e-05	0.00278407	0.57561	0.501398	1.91541	73	cg25565179, cg13005635, cg23693756, cg01293346, cg07741112, cg23914520, cg01557203, cg05750898, cg18658860, cg17844553, cg22791643, cg07266175, cg02330587, cg18421318, cg12424907, cg24250315, cg25953503, cg20031632, cg22997768, cg13217184, cg07342723, cg19534172, cg01150390, cg21152389, cg09474112, cg21874193, cg06604497, cg04749381, cg14718242, cg04875183, cg02647103, cg27453995, cg22403060, cg2…
DLEU7	0.000359413	0.0158972	0.498493	0.727736	1.91631	13	cg17288288, cg05965387, cg20400592, cg03389701, cg03333838, cg10359157, cg27051129, cg08274637, cg13846270, cg10085457
UTS2R	0.000273216	0.013638	0.498493	0.745795	1.91855	12	cg21448821, cg12598178, cg10634115, cg19668696, cg24192805, cg16423811, cg04191236
NLGN2	0.000222133	0.0119743	0.518848	0.788439	1.91905	10	cg09711113, cg09568217, cg10092265, cg03169180, cg00061695, cg20718319, cg03478846, cg15660077
C1orf59	0.000243906	0.012691	0.518848	0.810004	1.92089	9	cg23680821, cg24737783, cg27587125, cg16041286, cg06846186, cg11947712
TNXB	2.71211e-05	0.00342712	0.57561	0.506982	1.92513	71	cg18417373, cg09423875, cg09872737, cg16735938, cg00188055, cg20344925, cg18701983, cg19108771, cg03543593, cg07481886, cg25067686, cg14630933, cg14620908, cg17832639, cg16478197, cg19935845, cg07164109, cg21448535, cg07441854, cg02749948, cg14238986, cg17484510, cg25587092, cg15657588, cg14630748, cg26537323, cg12286154, cg06824720, cg22616343, cg03819671, cg21189146, cg09115485
PCGF3	2.11254e-05	0.00307707	0.57561	0.517344	1.9308	64	cg25712567, cg00614959, cg08923624, cg22777513, cg09269619, cg27210415, cg12148312, cg18005972, cg10864200, cg25670583, cg16767590, cg07697227, cg10843276, cg20051784, cg23376390, cg04128884, cg26959808, cg13941682, cg26131879, cg14229433, cg21942184, cg10548767, cg24899692, cg00252616, cg02912216, cg12135598, cg17170743
EID3	0.0003627	0.0159326	0.498493	0.705918	1.93728	15	cg25274376, cg10572274, cg00588621, cg01848457, cg21234561, cg09477407, cg05057777, cg18633684, cg27205904, cg26614816, cg20923245, cg15184308
B4GALNT4	0.0002957	0.0143142	0.498493	0.616285	1.93771	25	cg18916019, cg25020933, cg10798664, cg15971656, cg10828456, cg23409699, cg25868831, cg21996245, cg18546477, cg07556915, cg26461944, cg12811157, cg15762098, cg24194132, cg20846508
SLC25A2	0.000185571	0.0109128	0.518848	0.719368	1.93856	14	cg21636683, cg14739664, cg05845376, cg07039560, cg25212131, cg22748470, cg10540952, cg03060468, cg26518745, cg05638493, cg19215261
SGCE	3.8831e-05	0.00426922	0.557332	0.538575	1.94757	54	cg16492735, cg24885794, cg04303139, cg13660372, cg08291000, cg06674062, cg27120649, cg03384175, cg03682823, cg26503018, cg09890341, cg05531533, cg16761035, cg06695761, cg17701373, cg19924104, cg20041873, cg23616761, cg26997085, cg01566785, cg21853542, cg05819130, cg07921535, cg14873490, cg05096321, cg11589966, cg21771834, cg09512080, cg27393730, cg02965180, cg27435646, cg00906934, cg19107595, cg2…
GIT1	7.37172e-05	0.00613352	0.538434	0.850974	1.95498	8	cg20350981, cg08217285, cg05379350, cg16347833, cg22410751
PLD6	0.000258493	0.0131139	0.498493	0.712754	1.95604	15	cg25393494, cg16340422, cg23448998, cg11713493, cg00860641, cg11392858, cg03292213, cg19093370, cg24578857, cg26539818, cg02880176, cg00572586
FAM118A	0.000213413	0.0116449	0.518848	0.604248	1.95765	29	cg22160612, cg12262698, cg06575572, cg00643333, cg15477144, cg17795059, cg06315390, cg24477255, cg01404067, cg05149537
LDHD	0.000103667	0.00730711	0.538434	0.807112	1.9645	10	cg21434175, cg09899215, cg07320140, cg24429836, cg16540789, cg03085549, cg04906242, cg03743982
BTBD19	0.000102578	0.00730711	0.538434	0.767196	1.97361	12	cg26274118, cg14565781, cg04625834, cg09400475, cg12492197, cg09292826
MATN4	6.78685e-05	0.00592252	0.538434	0.608077	1.97635	30	cg08654443, cg14921939, cg14915878, cg15243856, cg22809920, cg27227742, cg10535411, cg21835643, cg03695613, cg16837441, cg26495953, cg07534843, cg23168456, cg14608505, cg16137772, cg00028844, cg06407657, cg16757724, cg20256260, cg27176129
ANKMY1	0.0001375	0.0088165	0.518848	0.645833	1.97709	23	cg03978514, cg07592361, cg13030331, cg20002504, cg25810938, cg00840370, cg13198503, cg11821086, cg13604246, cg23964682, cg15766075, cg02741393, cg18536132, cg04978266
HIST1H1A	0.000130547	0.00851811	0.518848	0.753527	1.98422	13	cg08511651, cg15741433, cg10146929, cg14703002, cg14652095, cg26713570, cg05816193, cg19082069, cg07816556, cg23829024, cg11282676, cg22128300
MAB21L2	0.000225691	0.0121325	0.518848	0.67492	1.98428	19	cg17433772, cg16385330, cg08219218, cg06205196, cg14904733, cg06495055, cg26218269, cg20334738, cg20481837, cg02580005, cg05878390, cg21977434, cg01012445
CPT1B	0.000104294	0.00730711	0.538434	0.666235	1.99303	21	cg17137457, cg17952465, cg19112186, cg01081346, cg00983520, cg18968256, cg16386697, cg00369357, cg02245810, cg05156901, cg06530441, cg17641876, cg24363820, cg00270625, cg10770023, cg08260245, cg07003941
KRBOX1	5.68462e-05	0.00534935	0.557332	0.777087	1.99905	12	cg10118419, cg02648562, cg14794247, cg23774386, cg11555493, cg06377306, cg21382037, cg27595003
MUC4	0.000179593	0.0107205	0.518848	0.71084	2.00442	16	cg13002712, cg10593292, cg15140981, cg08049923, cg07399928, cg15589427, cg19983801, cg21549260, cg05659262, cg08597092, cg23280655, cg03123551, cg15472754
CCL28	5.02074e-05	0.00498487	0.557332	0.779227	2.00456	12	cg00182712, cg13041796, cg20742784, cg17278992, cg08708644, cg03077492, cg14076417, cg09764314, cg26237003
SH3BP2	5.65849e-06	0.00141172	0.610527	0.552728	2.00573	56	cg22198044, cg01413404, cg25335944, cg10745272, cg00231918, cg01710886, cg15569052, cg17749374, cg00412094, cg23613051, cg07991621, cg00686694, cg03443467, cg10322254, cg07462790, cg22729100, cg08822227, cg14711616, cg24634455, cg02813750, cg03537321, cg24492202, cg06911765, cg10511758
LOC100302652	4.52282e-05	0.00465683	0.557332	0.78176	2.01107	12	cg11939825, cg01876338, cg08611810, cg19878627, cg19961545, cg05414908, cg00701946, cg13356253, cg01400468, cg12451530, cg19664945
SGPP2	1.33471e-05	0.00231908	0.593325	0.911482	2.0214	7	cg11300809, cg16968897, cg10091265, cg07873848
GPR81	7.15722e-05	0.00607807	0.538434	0.768295	2.02311	13	cg20566840, cg09745246, cg23505823, cg19975916, cg01306688, cg22972858, cg26643476, cg13702536, cg05290737, cg19328828
IQCA1	9.17474e-05	0.00676289	0.538434	0.709243	2.0307	17	cg09521719, cg24192364, cg00706159, cg17397592, cg05363903, cg13572144, cg18289240
TINAGL1	4.59033e-05	0.00467685	0.557332	0.688572	2.04091	20	cg15120085, cg22855405, cg07741616, cg03314569, cg18107144, cg15079885, cg16638238, cg25811375, cg16103203, cg00541683, cg26394270, cg22088096, cg01202491, cg02678971
TNNT1	6.57273e-05	0.00578757	0.538434	0.812506	2.04565	11	cg19504245, cg22711187, cg10218876, cg24699670, cg07189381, cg18649823, cg00844197, cg00915671, cg21127534
BCL9L	2.60923e-05	0.00334586	0.57561	0.759185	2.04585	14	cg20029201, cg02493211, cg04075973, cg08805054, cg11874426, cg11507178, cg20337103, cg12232470, cg03780927, cg02341556, cg15350899
CALHM2	7.59323e-05	0.00623478	0.538434	0.726236	2.04783	16	cg06722282, cg14302224, cg05042708, cg06075311, cg21686808, cg05319515, cg14000815, cg23753748, cg23175074, cg09336982
TMEM232	6.04739e-05	0.00547359	0.557332	0.715972	2.04996	17	cg10285888, cg22429640, cg17946588, cg23957216, cg06414816, cg06429214, cg23279021, cg25259944, cg17248924, cg26583412, cg27037608, cg11641395, cg19526166, cg10597099, cg24077801, cg19398821
ZNF516	2.11822e-05	0.00307707	0.57561	0.627998	2.05099	31	cg23483081, cg13354121, cg19470138, cg15350293, cg07646627, cg22079685, cg10504089, cg25725533, cg20132820, cg22444102, cg19277926, cg16619858, cg04962103, cg06092123, cg26505519, cg07620270, cg19951409, cg09174205
GPR75	4.95017e-05	0.00494002	0.557332	0.74864	2.05453	15	cg11939825, cg01876338, cg08611810, cg19878627, cg19961545, cg05414908, cg00701946, cg25102471, cg19911257, cg13356253, cg01400468, cg12451530, cg19664945, cg19592277, cg10124812
SLC19A3	5.54741e-05	0.00526598	0.557332	0.732159	2.06453	16	cg23122109, cg02562740, cg13466956, cg25713185, cg07417745, cg13966109, cg07365708
PRPS1L1	1.28396e-05	0.00231351	0.593325	0.805219	2.07142	12	cg21746050, cg19286658, cg23392950, cg14918144, cg00911873, cg03344806, cg12144754, cg24007612, cg11112914, cg13304306
FLJ44606	3.51354e-05	0.00407976	0.557332	0.724223	2.07359	17	cg05001932, cg26972554, cg15405432, cg10812634, cg14340928, cg02304092, cg22905511, cg17848407, cg21113900, cg27097438
CMYA5	7.50779e-06	0.00168677	0.610527	0.851961	2.07366	10	cg11438310, cg09481121, cg04154027, cg10257870, cg23279355, cg09655403, cg15197065, cg00431912, cg03546977
MS4A3	4.05239e-05	0.00441824	0.557332	0.736577	2.07699	16	cg19320193, cg18749799, cg19581091, cg04404514, cg08111960, cg24843263
RTKN	3.65003e-05	0.00412963	0.557332	0.65746	2.08302	26	cg26090072, cg00658082, cg14481208, cg09692695, cg03295928, cg25154474, cg00610692, cg26676034, cg19515035, cg25573114, cg02357623, cg00689340, cg26986064
ITPRIPL1	3.54306e-05	0.00407976	0.557332	0.738816	2.0833	16	cg02802590, cg06909469, cg18720905, cg08983217, cg06739059, cg05722266, cg17932631, cg24158111
MRGPRF	1.79426e-05	0.0027933	0.57561	0.674387	2.10013	24	cg19738774, cg24241586, cg02920396, cg27081634, cg01289483, cg05771342, cg13734833, cg22986999, cg23882131, cg21447477, cg25807487, cg12405136, cg03465499
EHHADH	1.68369e-05	0.00268562	0.57561	0.765377	2.10046	15	cg11935638, cg11660531, cg11806102, cg07884734, cg03414569, cg21685266, cg08095700, cg19536404, cg25219674, cg10550308, cg02738081, cg11755245
NINJ2	1.86381e-06	0.000771695	0.643552	0.59299	2.10542	49	cg00275686, cg11552370, cg01554891, cg02406350, cg03471195, cg21334546, cg15884713, cg08517040, cg23304078, cg14571491, cg05578102, cg20379954, cg09236951, cg19692784, cg24176612, cg01565145, cg20781967, cg10237701, cg16576285, cg12001021, cg00960440, cg15885383, cg20421525, cg18870751, cg00237010
PINLYP	7.36038e-06	0.00168509	0.610527	0.781318	2.1055	14	cg12818343, cg25857194, cg26547443, cg26354599, cg03873403, cg23139234, cg05458359, cg05720451, cg22150656
ARL5C	1.54663e-06	0.000686038	0.643552	0.873497	2.12608	10	cg07330481, cg16140242, cg00900933, cg06120399, cg09173348, cg12658374, cg13190608
TRPC3	7.73667e-06	0.00171086	0.593325	0.711889	2.12961	21	cg15267790, cg00058009, cg07674022, cg11079181, cg17018448, cg12747505, cg05548469, cg05422957, cg15798530, cg20893919, cg05854695, cg12944006, cg12975224, cg16162668, cg15482813
SDHAF1	2.49137e-06	0.000898538	0.627257	0.801515	2.15992	14	cg15584071, cg04579398, cg26643967, cg25468802, cg12416033, cg19389372, cg03226245
COX4I2	3.21978e-06	0.00102716	0.627257	0.822853	2.16678	13	cg17116120, cg21543589, cg11704513, cg26844208, cg12033622, cg08918020, cg27413508, cg26070540, cg17996391
DNLZ	2.69378e-06	0.000936088	0.627257	0.863032	2.17286	11	cg12463893, cg00853853, cg14035368, cg13446863, cg18033770
TMPRSS12	1.96895e-07	0.000166591	0.690132	0.899664	2.18977	10	cg01020079, cg25213362, cg12439325, cg15169829, cg02956274, cg27261219, cg19202760, cg25998706
TMEM100	1.46521e-06	0.000678881	0.643552	0.760797	2.20477	18	cg18040354, cg20073631, cg19403377, cg06441396, cg10976623, cg15945287, cg08762247, cg06271190, cg15095511, cg01155092
PLEKHM3	8.35687e-07	0.00042796	0.659444	0.770163	2.23192	18	cg09368486, cg20383801, cg08637946, cg19154323, cg06732666, cg27427227, cg00319536, cg18644787, cg04237128, cg19917744, cg27618172, cg21449384
DPEP3	2.21672e-07	0.000174682	0.690132	0.892891	2.24803	11	cg21695020, cg13559553, cg02893490, cg10199168, cg11999562, cg16170874, cg16880215, cg08530537, cg22828022
NNAT	3.25234e-08	5.5616e-05	0.719513	0.6609	2.28671	42	cg22943498, cg22551578, cg13708635, cg10981598, cg23605670, cg22510412, cg25712981, cg18433380, cg23566503, cg24762053, cg12862537, cg14765818, cg16648571, cg14469070, cg22421148, cg22298088, cg03615235, cg00576435, cg20783699, cg21588305, cg11174847, cg07360805, cg03061677, cg15473473, cg22378853, cg13790727, cg13690564, cg13901453, cg26083330, cg20601276, cg17643025, cg24338351, cg24675557, cg2…
SYCP1	6.24793e-08	6.62593e-05	0.704976	0.84727	2.3252	15	cg04987755, cg18087477, cg27332337, cg20441021, cg07724623, cg10440578, cg18396987, cg24985030, cg09685601, cg24330514, cg04115969, cg07832006
PM20D1	1e-10	3.892e-07	#N/A	0.966602	2.43361	11	cg26354017, cg11965913, cg12898220, cg14893161, cg14159672, cg07533224, cg05841700, cg24503407, cg07157834, cg16334093, cg07167872
